# Supplementary material for: Robust bi-directional photoswitching of thiomethyl substituted arylazopyrazoles under visible light
Source: Royal Society of Chemistry journal article supplement (doi:10.1039/d0cc04098c), 2020-01-01
Supplement: d0cc04098c1.pdf [file d0cc04098c1.pdf]

# Electronic Supplementary Information

## Robust bi-directional photoswitching of thiomethyl substituted arylazopyrazoles under visible light

Supriya Bhunia, Anirban Dolai, and Subhas Samanta\*

Department of Chemistry, University of Calcutta, 92 A.P.C Road, Kolkata-700009, West Bengal, India.

| Table of Contents                                                                                                      | Page No. |
|------------------------------------------------------------------------------------------------------------------------|----------|
| Additional Experimental and theoretical data .....                                                                     | S3-S10   |
| Synthesis .....                                                                                                        | S11-S13  |
| General methods .....                                                                                                  | S11      |
| General synthetic route .....                                                                                          | S11      |
| Experimental .....                                                                                                     | S11-S13  |
| X-ray Crystallography .....                                                                                            | S14      |
| Absorption spectra and photoswitching .....                                                                            | S14      |
| Determination of molar extinction coefficient .....                                                                    | S14      |
| Determination of <i>cis</i> and <i>trans</i> % in PSSs followed by determination of <i>cis</i> absorption spectra..... | S14-S15  |
| Photoswitching in different organic solvents.....                                                                      | S16      |
| Determination of thermal half-lives of <i>cis</i> isomers .....                                                        | S17      |
| Photobleaching .....                                                                                                   | S17-S18  |
| Photoswitching of <b>7</b> in DMSO and water and thermal relaxation of <i>cis</i> - <b>7</b> .....                     | S18      |
| Photoswitching of <b>8</b> in DMSO and water and thermal relaxation of <i>cis</i> - <b>8</b> .....                     | S19      |
| Glutathione stability of <i>trans</i> and <i>cis</i> isomers of <b>7</b> and <b>8</b> .....                            | S19      |
| <sup>1</sup> H and <sup>13</sup> C NMR spectra of <b>4-8</b> and their synthetic intermediates.....                    | S20-S30  |
| Computational chemistry .....                                                                                          | S31-S47  |
| References .....                                                                                                       | S47      |

### Table of Figures

|                                                                                                                                         |         |
|-----------------------------------------------------------------------------------------------------------------------------------------|---------|
| <b>Fig. S1.</b> Absorption spectra of PSS of <b>4-6</b> generated by various wavelengths of LEDs in DMSO.                               | S3      |
| <b>Fig. S2.</b> Calculated vs experimental UV-vis absorption spectra of <b>2a</b> & <b>4-6</b> in DMSO solvent.                         | S3-S4   |
| <b>Fig. S3.</b> Energetic diagram of frontier MOs of <i>trans</i> (top) and <i>cis</i> (bottom) isomers of <b>2a</b> , and <b>4-6</b> . | S5      |
| <b>Fig. S4.</b> Calculated structures of <i>trans</i> and <i>cis</i> isomers of <b>2a</b> and <b>4-6</b> .                              | S7-S8   |
| <b>Fig. S5.</b> Atomic charges calculated for minimum-energy geometry of <i>trans</i> - <b>4</b> and <i>cis</i> - <b>4</b> .            | S9      |
| <b>Fig. S6.</b> Atomic charges calculated for minimum-energy geometry of <i>trans</i> - <b>2a</b> and <i>cis</i> - <b>2a</b> .          | S10     |
| <b>Fig. S7.</b> <sup>1</sup> H NMR spectra of dark adapted state and PSSs of <b>6</b> in DMSO- <i>d</i> <sub>6</sub> .                  | S14     |
| <b>Fig. S8.</b> <sup>1</sup> H NMR spectra of dark adapted state and PSSs of <b>4</b> in DMSO- <i>d</i> <sub>6</sub> .                  | S15     |
| <b>Fig. S9.</b> <sup>1</sup> H NMR spectra of dark adapted state and PSSs of <b>5</b> in DMSO- <i>d</i> <sub>6</sub> .                  | S15     |
| <b>Fig. S10.</b> Photoswitching of <b>4</b> in acetonitrile, ethanol and toluene.                                                       | S16     |
| <b>Fig. S11.</b> Photoswitching of <b>5</b> in acetonitrile, ethanol and toluene.                                                       | S16     |
| <b>Fig. S12.</b> Photoswitching of <b>6</b> in acetonitrile, ethanol and toluene.                                                       | S16     |
| <b>Fig. S13.</b> Thermal <i>cis</i> -to- <i>trans</i> relaxation rates for <b>4</b> , <b>5</b> and <b>6</b> at 27°C in DMSO solvent.    | S17     |
| <b>Fig. S14.</b> Multiple rounds of photoswitching of <b>4-6</b> in DMSO.                                                               | S17-S18 |

|                                                                                                                                                                                             |         |
|---------------------------------------------------------------------------------------------------------------------------------------------------------------------------------------------|---------|
| <b>Fig. S15.</b> Photoswitching of <b>7</b> in DMSO and phosphate buffer, and thermal <i>cis</i> -to- <i>trans</i> relaxation rates in DMSO at 31°C.                                        | S18     |
| <b>Fig. S16.</b> Photoswitching of <b>8</b> in DMSO and in phosphate buffer, and thermal <i>cis</i> -to- <i>trans</i> relaxation rates in DMSO at 31°C.                                     | S19     |
| <b>Fig. S17.</b> UV-vis absorption scans of <i>trans</i> - <b>7</b> incubated with 10 mM GSH and TCEP (5 mmol) in phosphate buffer (pH 7.4) at 31°C, and multiple rounds of photoswitching. | S19     |
| <b>Fig. S18-S28.</b> <sup>1</sup> H / <sup>13</sup> C NMR spectra of <b>4-8</b> and their synthetic intermediates.                                                                          | S20-S30 |

## Table of Tables

|                                                                                                                       |         |
|-----------------------------------------------------------------------------------------------------------------------|---------|
| <b>Table S1.</b> Free energies for the <i>trans</i> and <i>cis</i> isomers of switches <b>2a</b> & <b>4-6</b> .       | S4      |
| <b>Table S2.</b> Atomic orbital contribution to frontier MOs.                                                         | S6      |
| <b>Table S3.</b> Dihedral angles and n-MO energies of <i>trans</i> and <i>cis</i> isomers of <b>2a</b> & <b>4-6</b> . | S8      |
| <b>Table S4.</b> XYZ coordinates optimized molecular geometry of <i>trans</i> - <b>4</b> .                            | S31     |
| <b>Table S5.</b> Details of electronic transitions of <i>trans</i> - <b>4</b> .                                       | S31-S32 |
| <b>Table S5.</b> XYZ coordinates optimized molecular geometry of <i>cis</i> - <b>4</b> .                              | S33     |
| <b>Table S6.</b> Details of electronic transitions of <i>cis</i> - <b>4</b> .                                         | S34-S35 |
| <b>Table S7.</b> XYZ coordinates optimized molecular geometry of <i>trans</i> - <b>5 (Conf-1)</b> .                   | S35     |
| <b>Table S8.</b> Details of electronic transitions of <i>trans</i> - <b>5 (Conf-1)</b> .                              | S35-36  |
| <b>Table S9.</b> XYZ coordinates optimized molecular geometry of <i>trans</i> - <b>5 (Conf-2)</b> .                   | S36-S37 |
| <b>Table S10.</b> Details of electronic transitions of <i>trans</i> - <b>5 (Conf-2)</b> .                             | S37-S38 |
| <b>Table S11.</b> XYZ coordinates optimized molecular geometry of <i>cis</i> - <b>5 (Conf-1)</b> .                    | S38     |
| <b>Table S12.</b> Details of electronic transitions of <i>cis</i> - <b>5 (Conf-1)</b> .                               | S38-S39 |
| <b>Table S13.</b> XYZ coordinates optimized molecular geometry of <i>cis</i> - <b>5 (Conf-2)</b> .                    | S40     |
| <b>Table S14.</b> Details of electronic transitions of <i>cis</i> - <b>5 (Conf-2)</b> .                               | S40-S41 |
| <b>Table S15.</b> XYZ coordinates optimized molecular geometry of <i>trans</i> - <b>6</b> .                           | S41-S42 |
| <b>Table S16.</b> Details of electronic transitions of <i>trans</i> - <b>6</b> .                                      | S42     |
| <b>Table S17.</b> XYZ coordinates optimized molecular geometry of <i>cis</i> - <b>6</b> .                             | S42-S43 |
| <b>Table S18.</b> Details of electronic transitions of <i>cis</i> - <b>6</b> .                                        | S43-S44 |
| <b>Table S19.</b> XYZ coordinates optimized molecular geometry of <i>trans</i> - <b>2a</b> .                          | S44     |
| <b>Table S20.</b> Details of electronic transitions of <i>trans</i> - <b>2a</b> .                                     | S44-45  |
| <b>Table S21.</b> XYZ coordinates optimized molecular geometry of <i>cis</i> - <b>2a</b> .                            | S45-S46 |
| <b>Table S22.</b> Details of electronic transitions of <i>cis</i> - <b>2a</b> .                                       | S46-S47 |

**Additional experimental and theoretical data:**

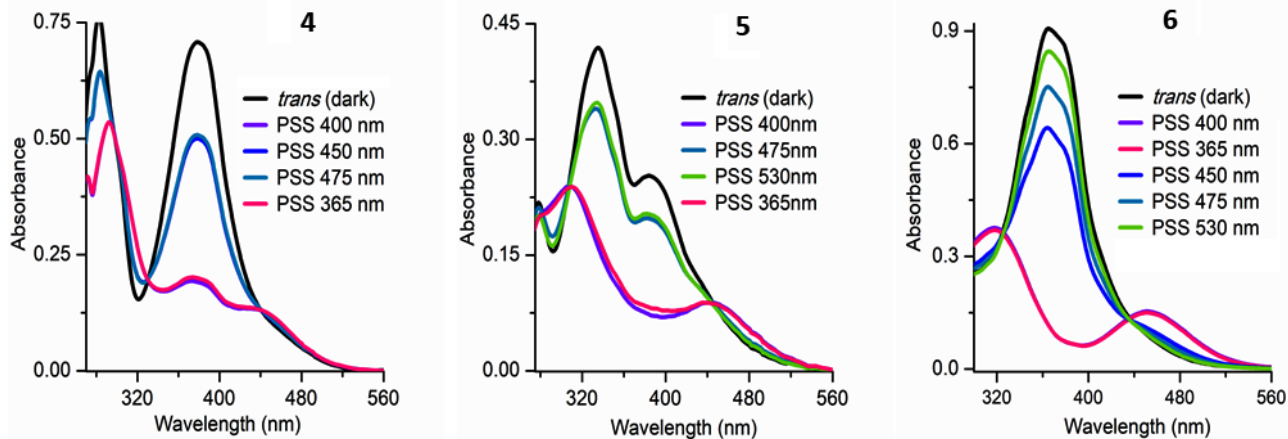

**Fig. S1.** Absorption spectra of PSS of 4-6 generated by various wavelengths of LEDs in DMSO.

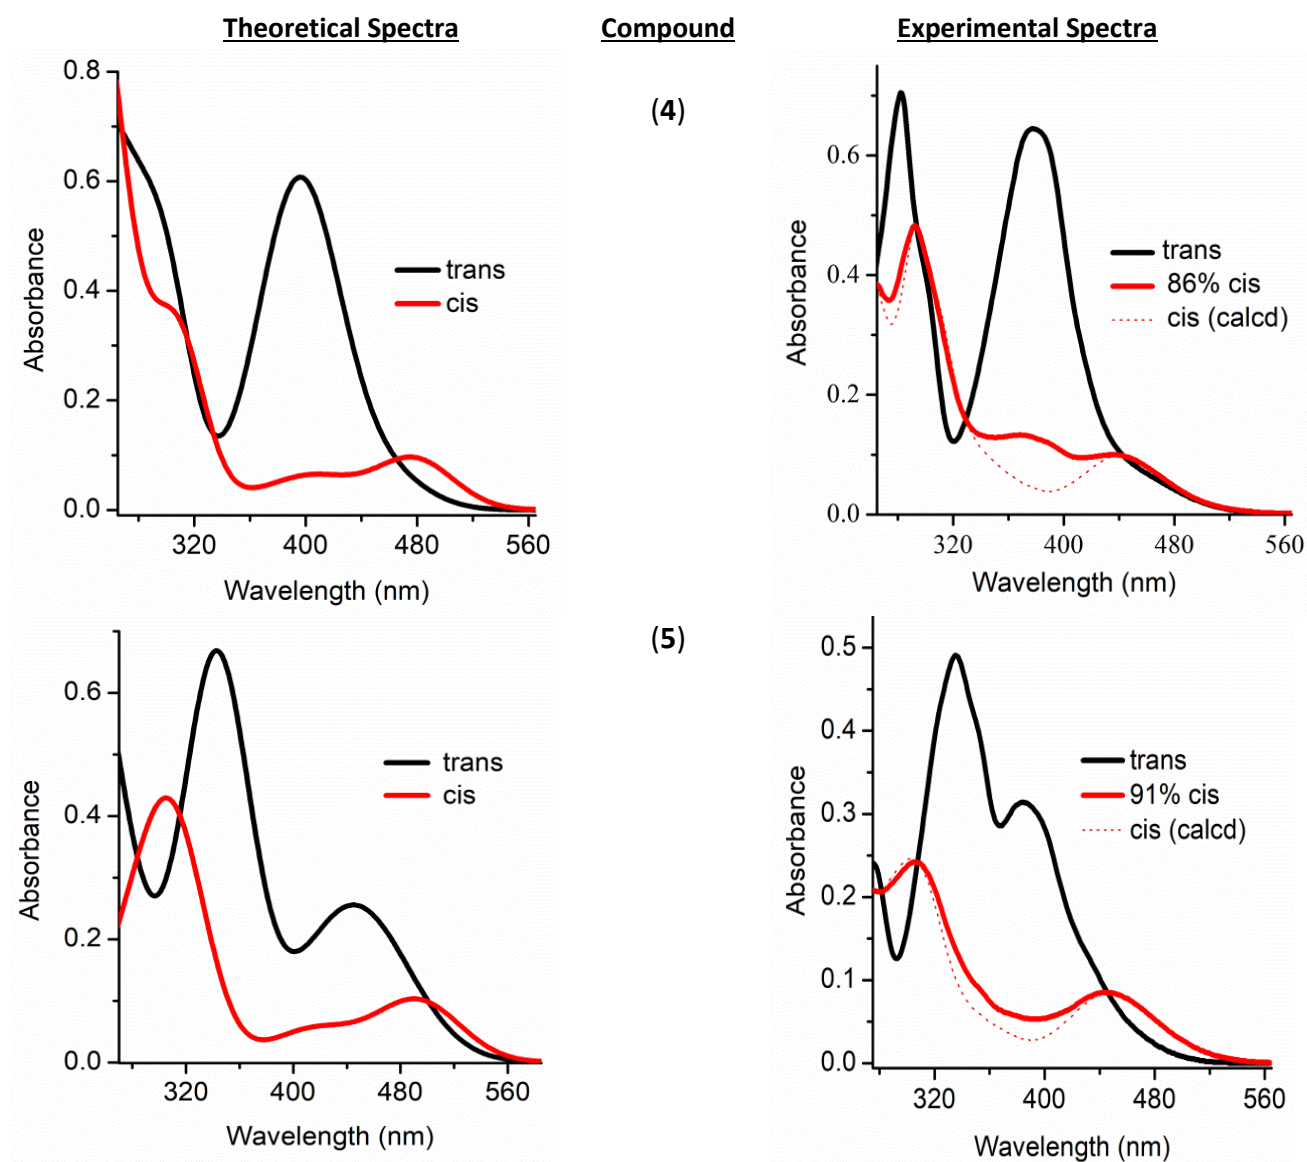

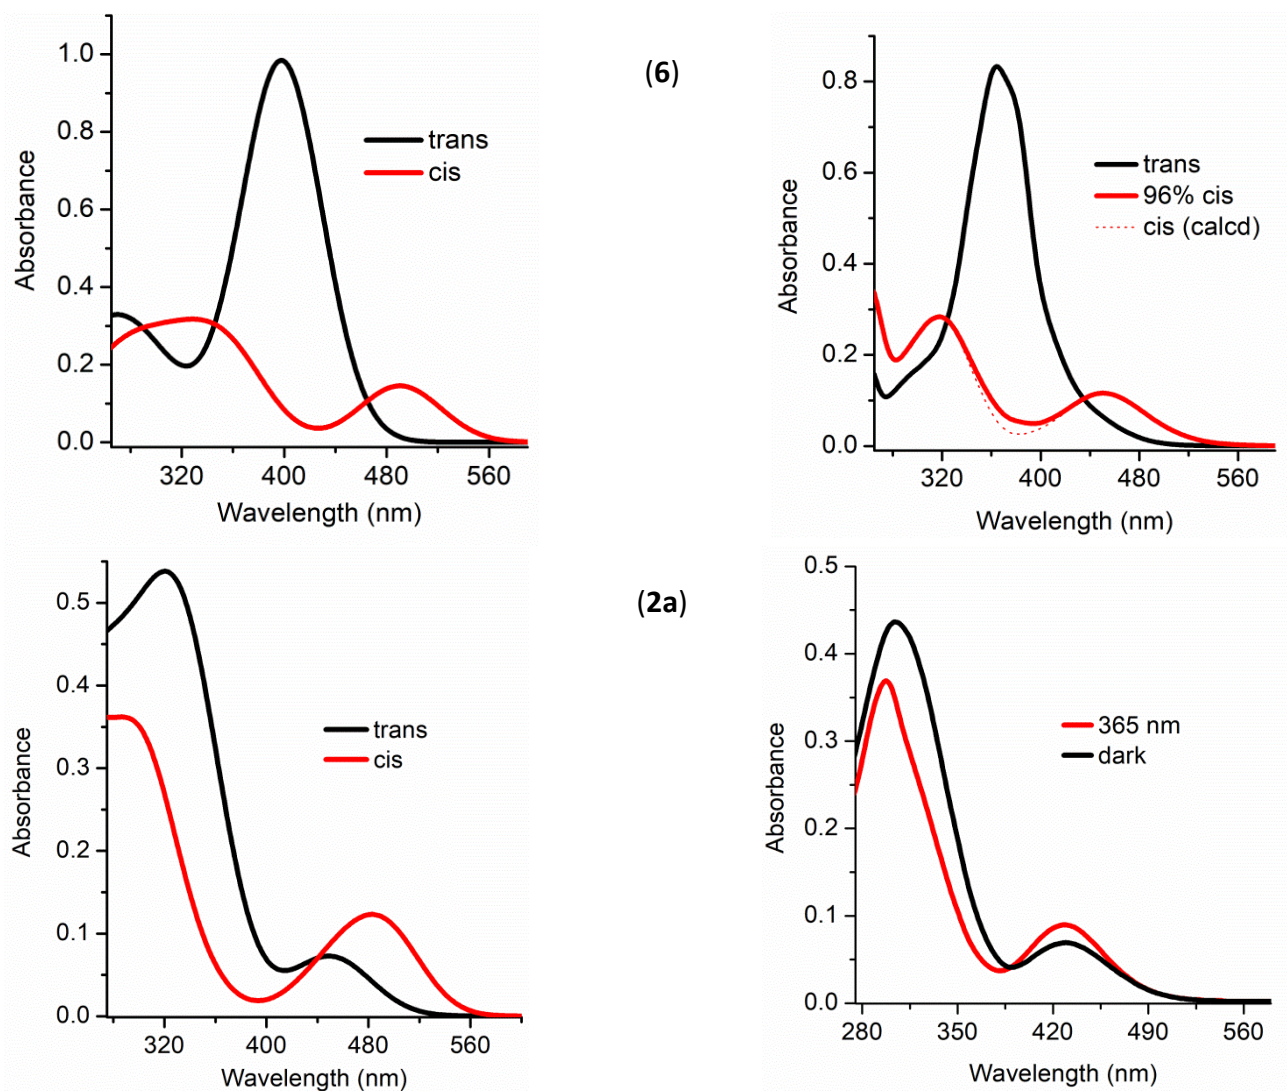

**Fig. S2.** Calculated vs experimental UV-Vis absorption spectra of **4-6** and **2a** in DMSO solvent. Two conformers were considered in case of both *cis* and *trans* isomers of **5**.

**Table S1.** Free energies for the *trans* and *cis* isomers of switches **2a** & **4-6**.

|           | <i>Trans</i> energy $G^\circ$<br>(eV) | <i>Cis</i> energy $G^\circ$ (eV) | Energy ( $G^\circ$ ) difference<br>( <i>trans-cis</i> ) (eV) | $t_{1/2}$ <i>cis</i> , experi-<br>-mental (day) <sup>a</sup> |
|-----------|---------------------------------------|----------------------------------|--------------------------------------------------------------|--------------------------------------------------------------|
| <b>2a</b> | -24863.17                             | -24862.65                        | 0.52 (11.99 kcal/mol)                                        | 111 <sup>b</sup>                                             |
| <b>4</b>  | -42441.12                             | -42440.46                        | 0.66 (15.22 kcal/mol)                                        | 1.1                                                          |
| <b>5</b>  | -30535.87 (conf-1)                    | -30535.23 (conf-1)               | 0.60 (13.84 kcal/mol) <sup>c</sup>                           | 3.3                                                          |
|           | -30535.75 (conf-2)                    | -30535.19 (conf-2)               |                                                              |                                                              |
| <b>6</b>  | -30535.96                             | -30535.25                        | 0.71 (16.37 kcal/mol)                                        | 2.7                                                          |

<sup>a</sup> Recorded in DMSO solvent at 27 °C; <sup>b</sup> Reported in acetonitrile; <sup>c</sup> Average of four energy difference values between *trans*-conformer-1/-2 and *cis*-conformer-1/-2.

The free energy difference between *cis* and *trans* isomers of **4-6** is ca. 0.60-0.71 eV, while that difference is ca. 0.52 eV for **2a**. The greater free energy difference between *cis* and *trans* isomers typically means lower activation barrier for thermal *cis*-to-*trans* reversion, leading to shorter thermal half-lives of *cis*-**4**/**5** and **6** in comparison to *cis*-**2a** (Table S1).



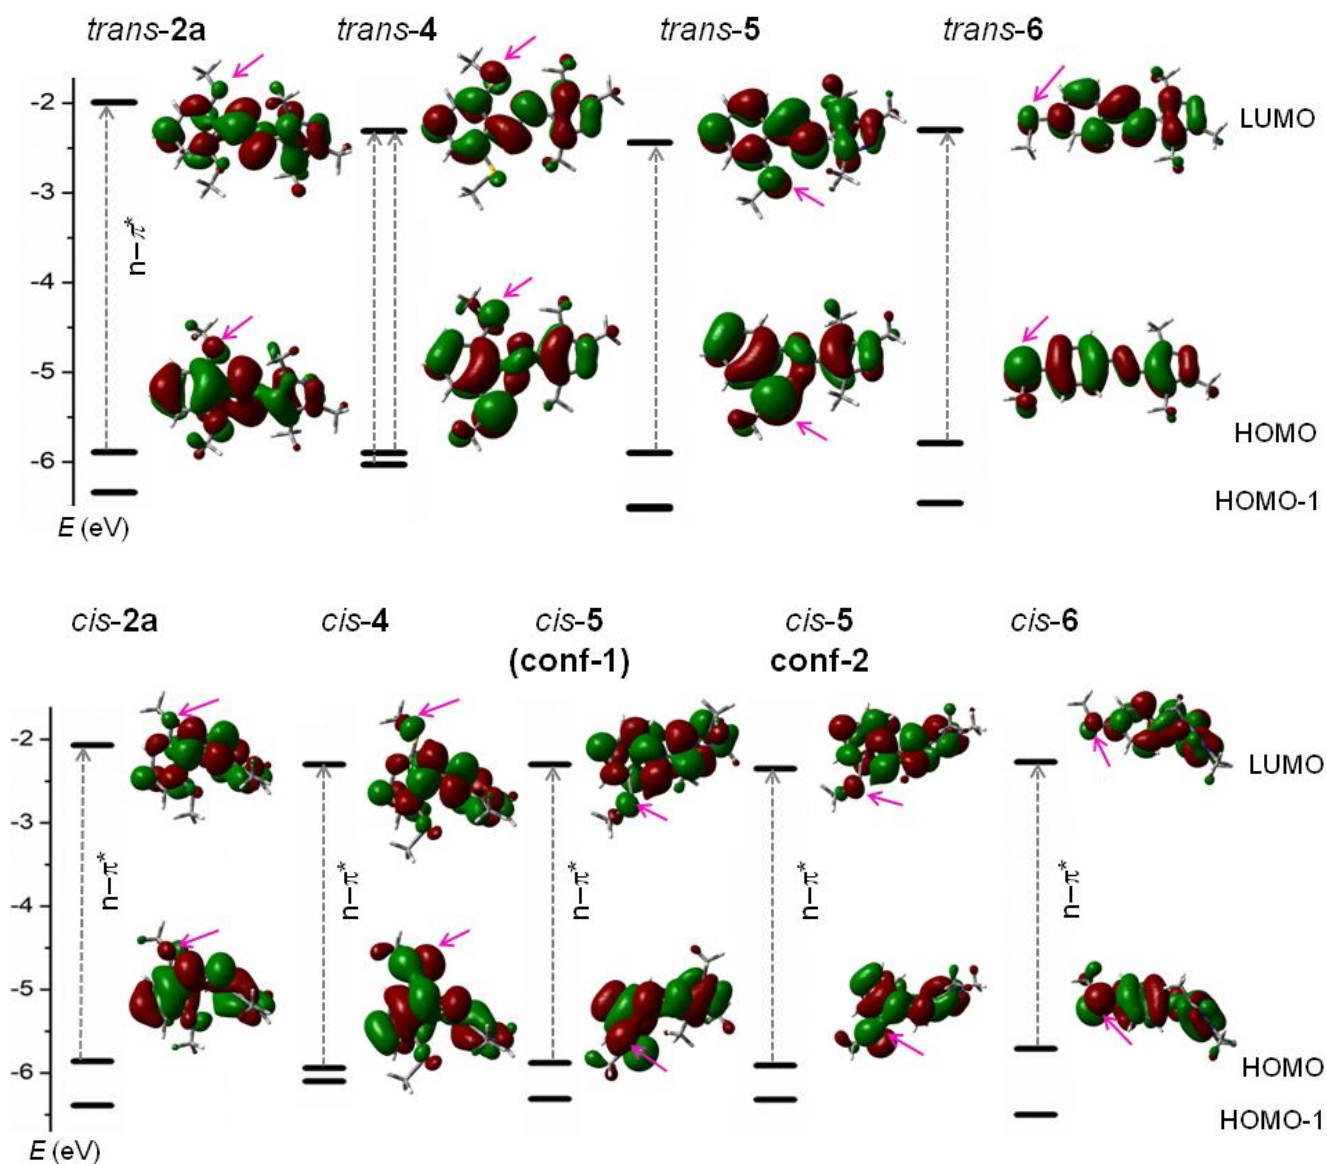

**Fig. S3.** Energetic diagram of frontier MOs of *trans* (top) and *cis* (bottom) isomers of **2a**, and **4-6**, and representations of LUMO (top) and HOMO (bottom). Dotted arrow illustrates long wavelength transition. Solid arrows show the lobe coefficients on the O and S atoms of  $-OMe$  and  $-SMe$  substituents, respectively.

Table S2. Atomic orbital contribution to the frontier MOs.<sup>a</sup>

| Compound | Frontier MO       | Trans                                                                                                                                                                                                                                | Cis                                                                                                                                                                                                                                                                 |
|----------|-------------------|--------------------------------------------------------------------------------------------------------------------------------------------------------------------------------------------------------------------------------------|---------------------------------------------------------------------------------------------------------------------------------------------------------------------------------------------------------------------------------------------------------------------|
| 2a       | HOMO              | C2-p=0.16 N8-p=0.16 N9-p=0.11 C4-p=0.09 C12-p=0.07 N8-s=0.06 C28-p=0.06 O37-p=0.05 N9-s=0.05 C12-s=-0.04 O38-p=0.04 C11-s=0.04 C23-p=0.04 C11-p=0.02 N13-p=0.02 N14-p=0.02 C10-p=0.01 C3-p=0.01                                      | N30-p=0.16 C3-p=0.13 N29-p=0.12 C20-p=0.09 C5-p=0.08 C18-p=0.06 C2-p=0.05 N30-s=0.04 N29-s=0.04 C9-p=0.04 O37-p=0.03 C19-p=0.03 O38-p=0.03 N31-p=0.03 N32-p=0.02 C19-s=0.02 C2 0-s=-0.02                                                                            |
|          | LUMO <sup>a</sup> | <b>N9-p=0.29 (29%) N8-p=0.28 (28%)</b> C10-p=0.10 C11-p=0.07 C4-p=0.06 C23-p=0.04 C28-p=0.03 C2-p=0.02 N13-p=0.02 N14-p=0.01 C2-s=0.01 C3-s=-0.01.                                                                                   | <b>N29-p=0.32 (32%) N30-p=0.31 (31%)</b> C18-p=0.09 C5-p=0.05 C9-p=0.05 C2-p=0.04 C19-p=0.04 C18-s=-0.03 C20-p=0.02 N31-p=0.02 C20-d=0.01<br><i>(Oxygen contribution is not identified as negligible.)</i>                                                          |
| 4        | HOMO              | <b>S28-p=0.26 (26%)</b> C2-p=0.13 C12-p=0.08 N8-p=0.06 C4-p=0.06 C23-p=0.06 N8-s=0.06 C1-p=0.05 C10-p=0.04 N9-p=0.04 N9-s=-0.04 <b>S30-p=0.04 (4%)</b> N13-p=0.03 C11-p=0.03 N14-p=0.02 C19-s=-0.02 C12-s=0.02 C29-p=0.02 C2-s=-0.02 | <b>S14-p=0.17 (17%)</b> N32-p=0.12 C3-p=0.12 N31-p=0.09 C22-p=0.08 C5-p=0.07 C1-p=0.05 N32-s=0.04 C9-p=0.04 N31-s=0.03 C20-p=0.03 N33-p=0.03 C3-s=0.02 C21-p=0.02 C22-s=-0.02 S19-p=0.02 N34-p=0.02 C20-s=0.01 C21-s=0.01                                           |
|          | LUMO              | <b>N9-p=0.26 (26%) N8-p=0.20 (20%)</b> C4-p=0.10 C10-p=0.09 C29-p=0.07 C11-p=0.06 C23-p=0.05 <b>S30-p=0.03 (3%)</b> C2-p=0.03 N13-p=0.02 <b>S28-p=0.01 (1%)</b> N14-p=0.01 C2-s=0.01                                                 | <b>N31-p=0.31 (31%) N32-p=0.27(27%)</b> C20-p=0.10 (10%) C5-p=0.05 (5%) C2-p=0.03 (3%) C21-p=0.03 (3%) C9-p=0.03 (3%) N33-p=0.03 (3%) <b>S14-p=0.02 (2%)</b> C22-p=0.02 (2%) C3-p=0.01 (1%) <b>S19-p=0.01 (1%)</b> C20-s=-0.01 (1%) C27-s=0.01 (1%) C22-d=0.01 (1%) |
| 6        | HOMO              | <b>S33-p=0.64 (64%)</b> C5-p=-0.13 C1-p=0.08 C3-p=0.06 C4-p=0.05 C1-s=0.05 H30-s=0.04 C4-s=0.04 H32-s=0.03 N9-p=0.02 C29-p=0.02 C10-p=0.01 C2-s=0.01 C2-p=0.01                                                                       | <b>S34-p=0.21 (21%)</b> N21-p=0.10 N20-p=0.10 C3-p=0.09 C11-p=0.08 C5-p=0.06 C9-p=0.04 C1-p=0.04 C2-p=0.03 C4-p=0.03 C8-p=0.03 N21-s=0.03 N20-s=0.03 N22-p=0.03 C10-p=0.02 N23-p=0.02 C9-s=0.01                                                                     |
|          | LUMO              | <b>N9-p=0.26 (26%) N8-p=0.22 (22%)</b> C10-p=0.11 C2-p=0.08 C5-p=0.07 C23-p=0.06 <b>S33-s=0.04 (4%)</b> C3-p=0.04 C29-s=-0.03 <b>S33-p=0.03 (3%)</b> C1-s=0.02 C4-p=0.02 N13-p=0.01 C10-s=0.01                                       | <b>N20-p=0.30 (18%) N21-p=0.26 (14%)</b> C2-p=0.07 C5-p=0.07 C8-p=0.06 C9-p=0.05 C10-p=0.04 <b>S34-p=0.02 (2%)</b> C3-p=0.02 C10-s=-0.02 C11-p=0.02 C3-s=-0.01 N22-p=0.01 N21-s=0.01 C1-p=0.01                                                                      |

<sup>a</sup> = Oxygen contribution to both LUMOs of trans and cis isomers is negligible and thus not identified in the calculation.

**Geometry optimized structures:**

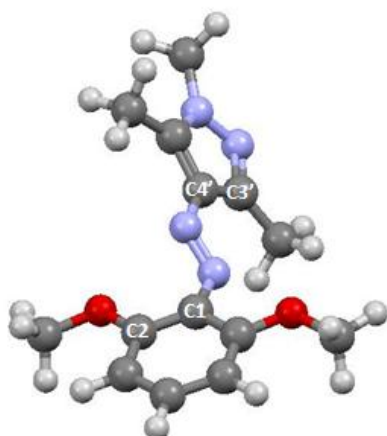

*Trans-2a*

Dihedral angle:  $\phi$  [C2-C1-N=N] = 55.9° &  
 $\theta$  [C3'-C4'-N=N] = 4.1°

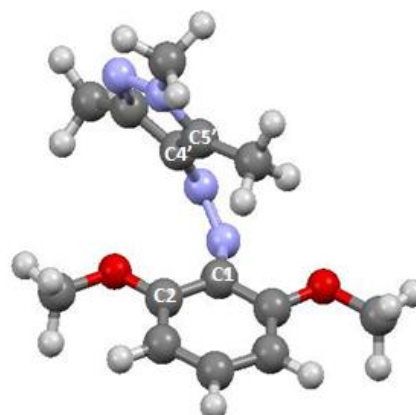

*cis-2a*

Dihedral angle:  $\phi$  [C2-C1-N=N] = 60.6°  
 $\theta$  [C5'-C4'-N=N] = 43.2°

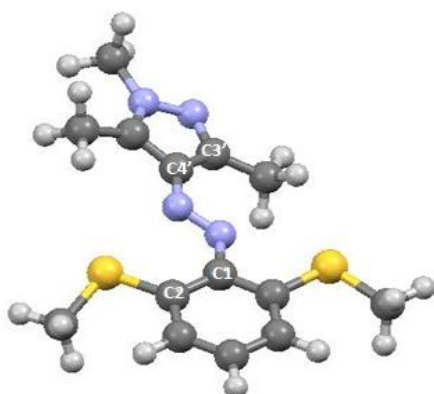

*trans-4*

Dihedral angle:  $\phi$  [C2-C1-N=N] = 19.9°  
 $\theta$  [C3'-C4'-N=N] = 4.0°

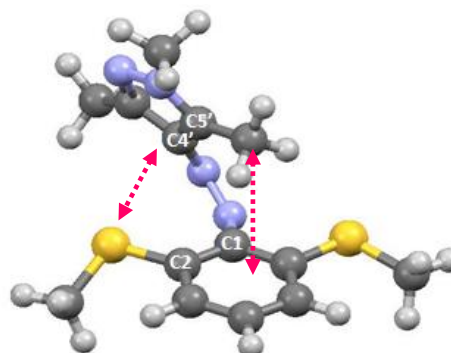

*cis-4*

Dihedral angles:  $\phi$  [C2-C1-N=N] = 59.4°  
 $\theta$  [C5'-C4'-N=N] = 36.3°

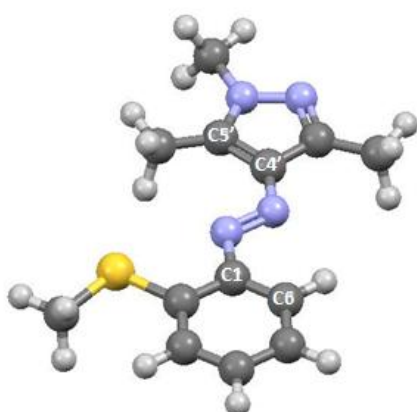

*trans-5 (conformer-1)*

Dihedral angles:  $\phi$  [C6-C1-N=N] = 0.15°  
 $\theta$  [C5'-C4'-N=N] = 0.9°

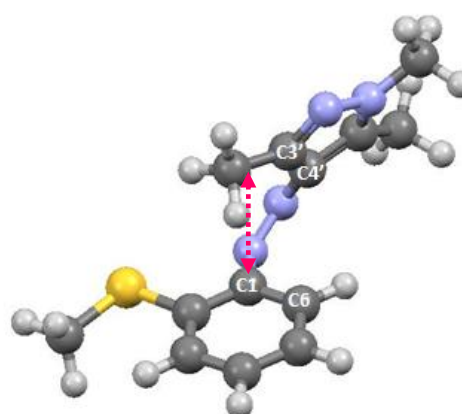

*cis-5 (conformer-1)*

Dihedral angles:  $\phi$  [C6-C1-N=N] = 50.43°  
 $\theta$  [C3'-C4'-N=N] = -40.0°

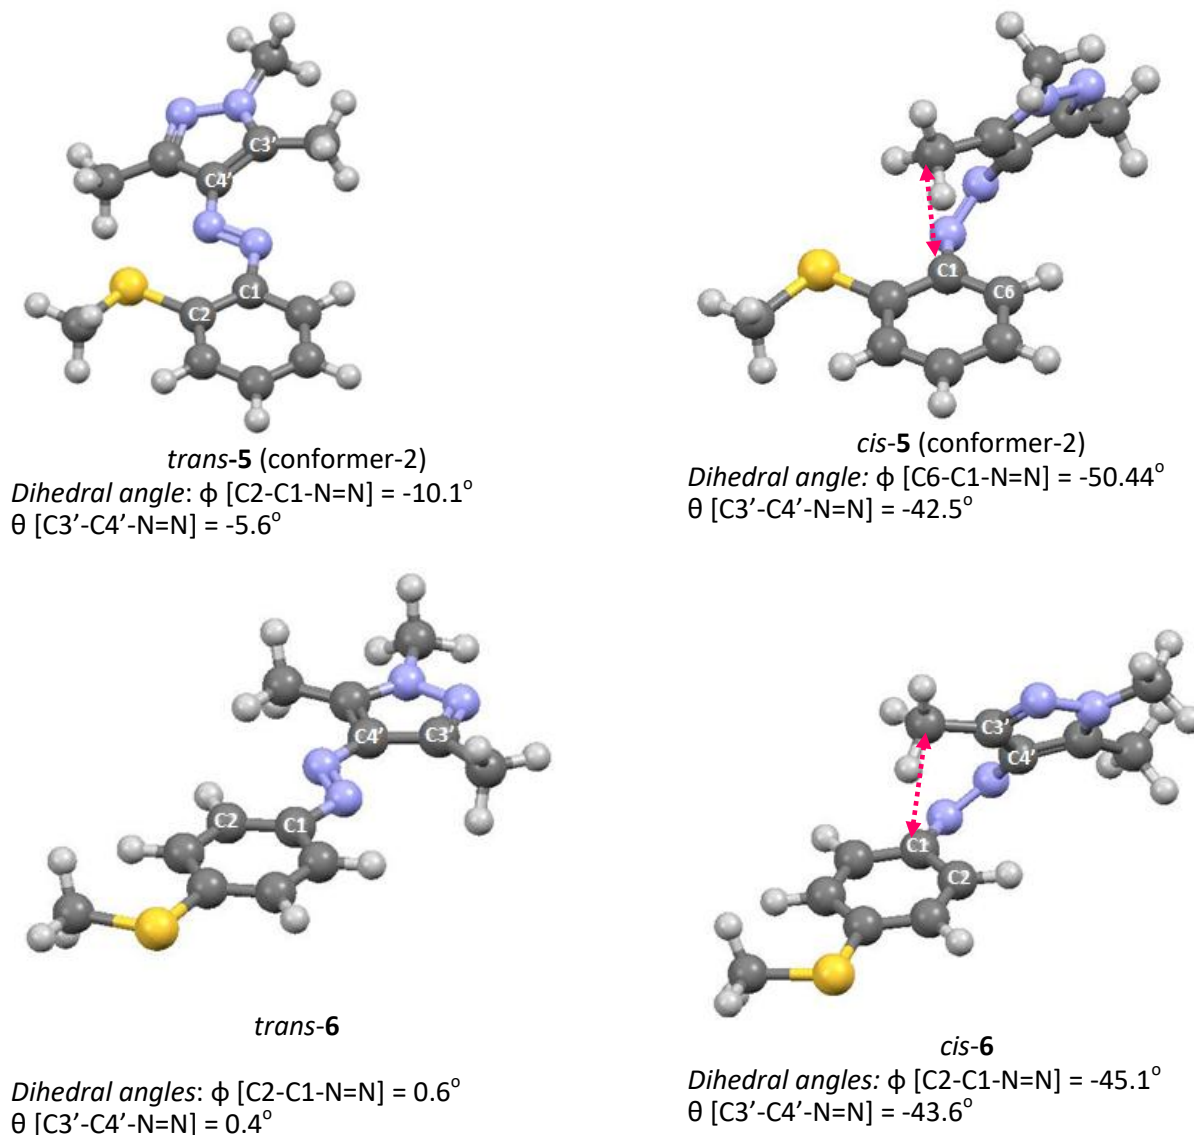

**Fig. S4.** Calculated structures of *trans* and *cis* isomers of **2a** and **4-6**, obtained on B3LYP/6-311++g(d,p) level of theory with DMSO solvent model. Dihedral angles are shown under each structure. The double headed arrow shows steric clash in *cis* isomer.

**Table S3.** Dihedral angles and n-MO energies of *trans* and *cis* isomers of **2a** & **4-6**.

|           | dihedral angle<br>$\phi$ ( <i>trans</i> ) | dihedral angle<br>$\theta$ ( <i>trans</i> ) | dihedral angle<br>$\phi$ ( <i>cis</i> ) | dihedral angle<br>$\theta$ ( <i>cis</i> ) |
|-----------|-------------------------------------------|---------------------------------------------|-----------------------------------------|-------------------------------------------|
| <b>2a</b> | $55.9^\circ$                              | $4.1^\circ$                                 | 60.6                                    | $43.2^\circ$                              |
| <b>4</b>  | $19.9^\circ$                              | $4.0^\circ$                                 | $59.4^\circ$                            | $36.3^\circ$                              |
| <b>5</b>  | $0.1^\circ/-10^\circ$                     | $0.9^\circ/-5.6^\circ$                      | $-50.43^\circ/-50.43^\circ$             | $-40.0^\circ/-42.5^\circ$                 |
| <b>6</b>  | $0.6^\circ$                               | $0.4^\circ$                                 | $-45.1^\circ$                           | $-43.6^\circ$                             |



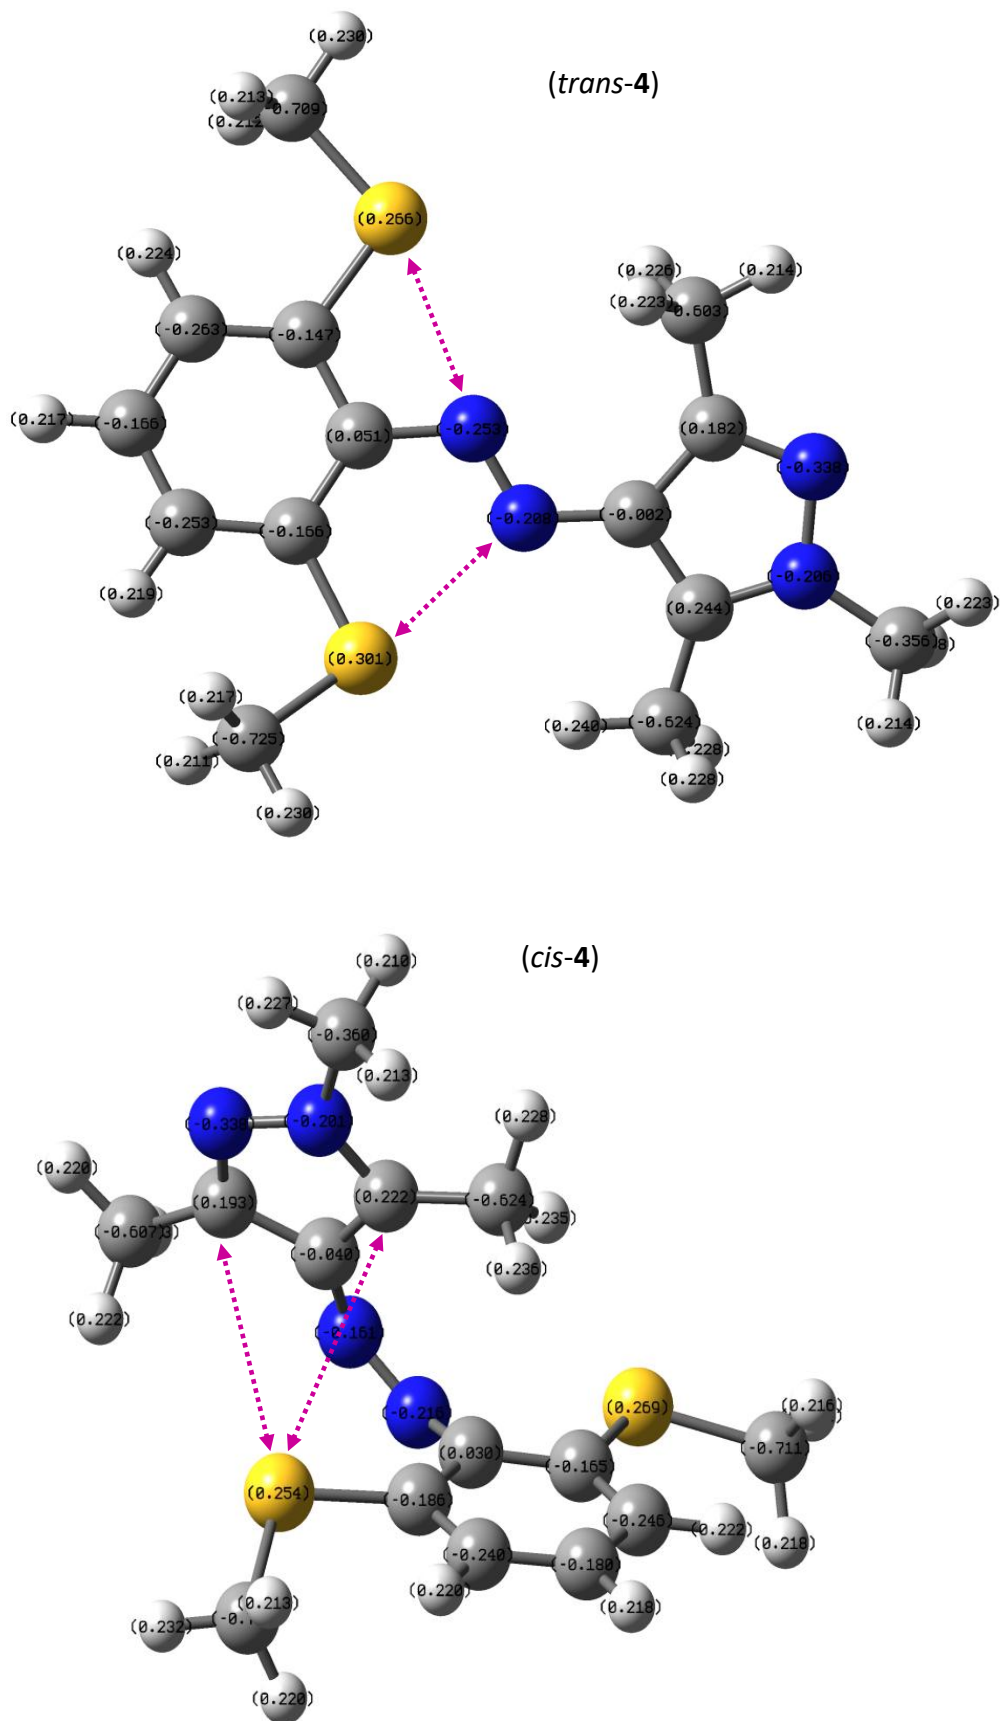

**Fig. S5.** Atomic charges calculated for minimum-energy geometry of *trans-4* and *cis-4*. The double headed dotted arrows indicate electrostatic attraction between positively charge S atom and negatively charged N atom in *trans-4* (top) leading to more planar structure than the *trans-2a*, and electrostatic repulsion between S atom and positively charged C atoms of pyrazole in *cis-4* (bottom) leading to its less thermal stable than most AAPZs.

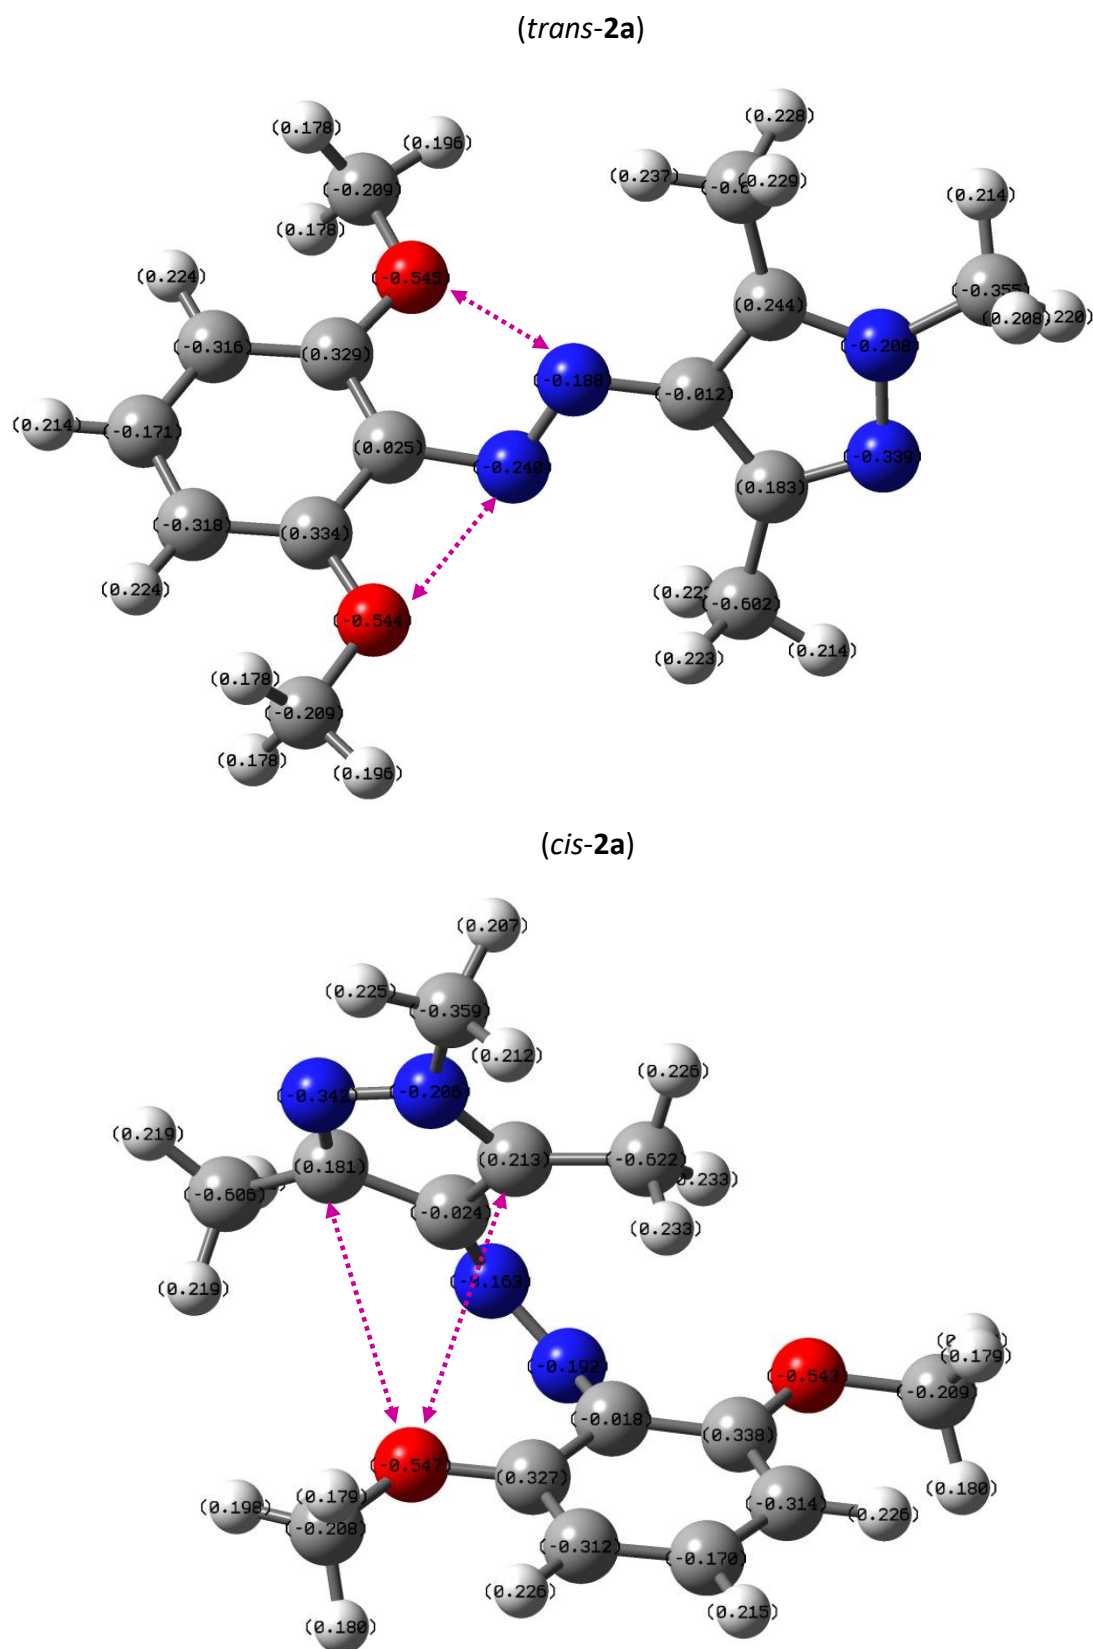

**Fig. S6.** Atomic charges calculated for minimum-energy geometry of *trans-2a* and *cis-2a*. The double headed dotted arrows indicate electrostatic repulsion between negatively charge O atom and negatively charged N atom in *trans-2a* (top) leading to more non-planar structure than the *trans-4*, and electrostatic attraction between O atom and positively charged C atoms of pyrazole in *cis-2a* (bottom) leading to its high thermal stable.

## Synthesis:

### General methods

Reagents were purchased from Alfa Aesar, Sigma-Aldrich, TCI, Avra or Spectrochem and used without further purification. Reactions requiring anhydrous conditions were conducted in oven-dried glassware under an inert atmosphere (argon). Solvents were dried according to conventional methods before use. All reactions were monitored by thin-layer chromatography (TLC) using Merck silica gel 60 F254 plates (0.25 mm). Column chromatography was performed using silica gel (100 – 200 mesh particle size) treated with a solvent system specified in the individual procedures. Solvents were removed by rotary evaporator and the compounds further dried using high vacuum pumps.

$^1\text{H}$  and  $^{13}\text{C}$  NMR were recorded on a Bruker 300 MHz spectrometer. Chemical shifts ( $\delta$ ) are quoted in ppm (parts per million). Low resolution ESI mass spectra were recorded by the Department of Chemistry Mass Spectroscopy Service using ESI-MS (waters).

Abbreviations: DMSO: dimethyl sulfoxide, DCM: dichloromethane, ACN: acetonitrile, rt: room temperature.

### Scheme S1. General synthetic route

The *thio*-substituted-arylazopyrazoles **4-8** were synthesized as outlined in the scheme below.

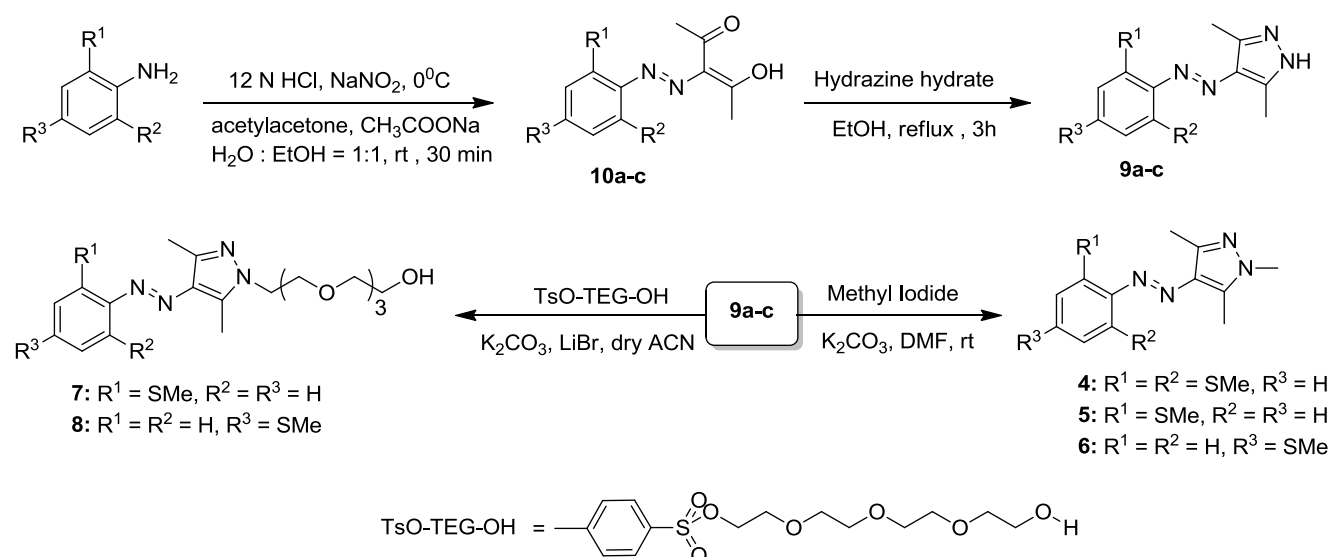

### Experimental:

**General procedure of synthesis of arylazoacetylacetone derivatives (10a-c):** To a ice-cold solution of a suitably substituted aniline derivative<sup>1-2</sup> (1.0 mmol) in AcOH (2 mL) containing HCl (12M, 0.5 mL) was added drop-wise a 2 mL aqueous solution of  $\text{NaNO}_2$  (1.2 mmol). After stirring the solution for 1 h, it was added drop-wise to a solution of pentan-2,4-dione (1.3 mmol) and NaOAc (3.0 mmol) in 50% aqueous EtOH (4 mL). The reaction was stirred for another 30 min, the yellow precipitate obtained was filtered and washed with 50% aqueous ethanol to afford a yellow solid.

**(E)-3-((E)-(2,6-bis(methylthio)phenyl)diazonyl)-4-hydroxypent-3-en-2-one (10a):** Yield 77% as a yellow solid;  $^1\text{H}$  NMR (300 MHz,  $\text{CDCl}_3$ ):  $\delta$  15.14 (brs, 1H), 7.19 – 7.10 (m, 3H), 2.56 (s, 3H), 2.46 (s, 3H), 2.38 (s, 6H);  $^{13}\text{C}$  NMR (300 MHz,  $\text{CDCl}_3$ ):  $\delta$  197.68, 137.44, 133.32, 131.00, 126.29, 125.85, 31.68, 27.62, 17.46.

**(E)-3-((E)-(2-(methylthio)phenyl)diazonyl)-4-hydroxypent-3-en-2-one (10b):**<sup>3</sup> Yield 79% as a yellow solid;  $^1\text{H}$  NMR (300 MHz,  $\text{CDCl}_3$ ):  $\delta$  15.00 (brs, 1H), 7.71 (dd,  $J = 8.2$  Hz, 1.1 Hz, 1H), 7.43 (dd,  $J = 7.8$  Hz, 1.2 Hz, 1H), 7.32 – 7.26 (m, 1H), 7.12 – 7.06 (m, 1H), 2.57 (s, 3H), 2.45 (s, 3H), 2.40 (s, 3H).

**(E)-3-((E)-(4-(methylthio)phenyl)diazenyl)-4-hydroxypent-3-en-2-one (10c):** Yield 73% as a yellow solid; <sup>1</sup>H NMR (300 MHz, CDCl<sub>3</sub>): δ 14.82 (brs, 1H), 7.38 – 7.28 (m, 4H), 2.61 (s, 3H), 2.52 (s, 3H), 2.49 (s, 3H); <sup>13</sup>C NMR (300 MHz, CDCl<sub>3</sub>): δ 197.94, 197.00, 139.09, 136.13, 133.12, 127.97, 116.80, 31.67, 26.65, 16.28.

**General procedure of synthesis of arylazopyrazole derivatives (9a-c):** Synthesis of **9a** is described as a representative case. A mixture of **10a** (0.30 mmol) and hydrazine-hydrate (0.30 mmol) in ethanol (3 mL) was refluxed for 3 h. After completion of the reaction, as judged by TLC analysis, it was cooled to room temperature, concentrated on a rotary evaporator and extracted with ethyl acetate. The combined organic layer was washed with water and brine, dried with anhyd. Na<sub>2</sub>SO<sub>4</sub>, filtered and concentrated *in vacuo*. The crude product was subjected to a flash silica gel column chromatography to afford pure **9a**.

**(E)-1-(2,6-bis(methylthio)phenyl)-2-(3,5-dimethyl-1H-pyrazol-4-yl)diazene (9a):** Yield 83% as a brown solid; <sup>1</sup>H NMR (300 MHz, CDCl<sub>3</sub>): δ 7.19 (t, *J* = 7.9 Hz, 1H), 7.01 (d, *J* = 8.1 Hz, 2H), 2.58 (s, 3H), 2.56 (s, 3H), 2.37 (s, 6H); <sup>13</sup>C NMR (300 MHz, CDCl<sub>3</sub>): δ 145.61, 141.73, 136.69, 135.10, 128.38, 120.16, 29.72, 15.95, 12.64; LRMS (ESI): *m/z* calcd for C<sub>13</sub>H<sub>17</sub>N<sub>4</sub>S<sub>2</sub>: 293.0894 [M+1]<sup>+</sup>; found: 293.0749.

**(E)-1-(3,5-dimethyl-1H-pyrazol-4-yl)-2-(2-(methylthio)phenyl)diazene (9b):** Yield 80% yield as a brown solid; <sup>1</sup>H NMR (300 MHz, CDCl<sub>3</sub>): δ 7.60 (dd, *J* = 8.1 Hz, 1.2 Hz, 1H), 7.31 – 7.25 (m, 1H), 7.22 (d, *J* = 1.2 Hz, 1H), 7.12 – 7.07 (m, 1H), 5.31 (brs, 1H), 2.57 (s, 6H), 2.43 (s, 3H); <sup>13</sup>C NMR (300 MHz, CDCl<sub>3</sub>): δ 149.27, 141.80, 139.72, 130.19, 124.36, 124.16, 115.55, 29.71, 14.46, 12.33; LRMS (ESI): *m/z* calcd for C<sub>12</sub>H<sub>15</sub>N<sub>4</sub>S: 247.1017 [M+1]<sup>+</sup>; found: 247.1021.

**(E)-1-(3,5-dimethyl-1H-pyrazol-4-yl)-2-(4-(methylthio)phenyl)diazene (9c):** Yield 81% as a yellow brown solid; <sup>1</sup>H NMR (300 MHz, CDCl<sub>3</sub>): δ 10.80 (brs, 1H), 7.75 (dd, *J* = 7.1 Hz, 1.6 Hz, 2H), 7.32 (dd, *J* = 6.9 Hz, 1.5 Hz, 2H), 2.62 (s, 6H), 2.56 (s, 3H); <sup>13</sup>C NMR (300 MHz, CDCl<sub>3</sub>): δ 151.00, 141.34, 140.57, 134.66, 126.27, 122.33, 15.62, 12.18; LRMS (ESI): *m/z* calcd for C<sub>12</sub>H<sub>15</sub>N<sub>4</sub>S: 247.1017 [M+1]<sup>+</sup>; found: 247.0803.

**General Procedure of Synthesis of arylazopyrazoles 4-6:** Synthesis of **4** from **9a** is described as a representative case. A mixture of **9a** (0.10 mmol) and K<sub>2</sub>CO<sub>3</sub> (0.20 mmol) in DMF (2 mL) was stirred at 40°C for 20 min. Then iodomethane (0.12 mmol) was added to the reaction and it was stirred for 12 h at room temperature. The reaction mixture was diluted with ethyl acetate, and the organic layer was washed with H<sub>2</sub>O and brine, dried over anhydrous Na<sub>2</sub>SO<sub>4</sub>, and filtered. The filtrate was concentrated under reduced pressure, and the crude produce was purified by column chromatography on silica gel to yield **4** as a brown-red solid.

**(E)-1-(2,6-bis(methylthio)phenyl)-2-(1,3,5-trimethyl-1H-pyrazol-4-yl)diazene (4):** Yield 87% as a brown red solid; <sup>1</sup>H NMR (300 MHz, CDCl<sub>3</sub>): δ 7.17 (dd, *J* = 8.4 Hz, 8.4 Hz, 1H), 7.00 (d, *J* = 7.8 Hz, 2H), 3.72 (s, 3H), 2.57 (s, 3H), 2.49 (s, 3H), 2.36 (s, 6H); <sup>13</sup>C NMR (300 MHz, CDCl<sub>3</sub>): δ 145.66, 142.57, 139.15, 136.39, 135.50, 128.22, 120.16, 36.06, 15.96, 14.30, 10.44; LRMS (ESI): *m/z* calcd for C<sub>14</sub>H<sub>19</sub>N<sub>4</sub>S<sub>2</sub>: 307.1051 [M+1]<sup>+</sup>; found: 307.0948.

**(E)-1-(2-(methylthio)phenyl)-2-(1,3,5-trimethyl-1H-pyrazol-4-yl)diazene (5):** Yield 85% as a brown solid; <sup>1</sup>H NMR (300 MHz, CDCl<sub>3</sub>): δ 7.68 (dd, *J* = 8.1 Hz, 1.2 Hz, 1H), 7.38 – 7.33 (m, 1H), 7.30 (d, *J* = 1.5 Hz, 1H), 7.21 – 7.15 (m, 1H), 3.82 (s, 3H), 2.63 (s, 3H), 2.56 (s, 3H), 2.52 (s, 3H); <sup>13</sup>C NMR (300 MHz, CDCl<sub>3</sub>): δ 149.34, 142.94, 139.38, 138.89, 135.78, 129.86, 124.34, 124.08, 115.41, 36.07, 14.46, 14.03, 10.18; LRMS (ESI): *m/z* calcd for C<sub>13</sub>H<sub>17</sub>N<sub>4</sub>S: 261.1173 [M+1]<sup>+</sup>; found: 261.1170.

**(E)-1,3,5-trimethyl-4-((4-(methylthio)phenyl)diazenyl)-1H-pyrazole (6):** Yield 91% as a brown solid; <sup>1</sup>H NMR (300 MHz, CDCl<sub>3</sub>): δ 7.75 (d, *J* = 8.7 Hz, 2H), 7.33 (d, *J* = 8.4 Hz, 2H), 3.83 (s, 3H), 2.60 (s, 3H), 2.56 (s, 3H), 2.53 (s, 3H); <sup>13</sup>C NMR (300 MHz, CDCl<sub>3</sub>): δ 151.11, 142.38, 140.26, 138.52, 135.06, 126.36, 122.24, 35.98, 15.68, 13.82, 9.97; LRMS (ESI): *m/z* calcd for C<sub>13</sub>H<sub>17</sub>N<sub>4</sub>S: 261.1173 [M+1]<sup>+</sup>; found: 261.1170.

**General procedure of synthesis of water soluble arylazopyrazole derivatives 7 and 8:** Synthesis of **7** is described as representative. To a mixture of arylazopyrazole **9b** (0.13 mmol) and K<sub>2</sub>CO<sub>3</sub> (0.65 mmol) in dry ACN (3 mL), TsO-TEG-OH<sup>4</sup> (0.14 mmol) and LiBr (catalytic amount) were added. After refluxing the reaction mixture for 24 h, it was concentrated under reduced pressure, and the residue obtained was diluted with EtOAc. The

organic layer was washed with water and brine, dried over Na<sub>2</sub>SO<sub>4</sub>, filtered and concentrated. The crude organic content was subjected to silica gel column chromatography with 2% methanol in DCM to yield **7** as red liquid.

**(E)-2-(2-(2-(2-(3,5-dimethyl-4-((2-(methylthio)phenyl)diazenyl)-1H-pyrazol-1-**

**yl)ethoxy)ethoxy)ethoxy)ethanol (7):** Yield 54% as a red liquid; <sup>1</sup>H NMR (300 MHz, CDCl<sub>3</sub>): δ 7.67 (dd, *J* = 7.8 Hz, 1.2 Hz, 1H), 7.37 - 7.32 (m, 1H), 7.28 (dd, *J* = 7.8 Hz, 1.2 Hz, 1H), 7.20 - 7.14 (m, 1H), 4.24 (t, *J* = 5.4 Hz, 2H), 3.89 (t, *J* = 5.4 Hz, 2H), 3.72 - 3.69 (m, 2H), 3.64 - 3.56 (m, 10H), 2.65 (s, 3H), 2.56 (s, 3H), 2.51 (s, 3H); <sup>13</sup>C NMR (300 MHz, CDCl<sub>3</sub>): δ 149.38, 143.00, 140.55, 139.35, 135.65, 129.82, 124.33, 124.07, 115.40, 72.50, 70.71, 70.59, 70.50, 70.29, 69.86, 61.67, 49.04, 14.44, 14.31, 10.08; LRMS (ESI): *m/z* calcd for C<sub>20</sub>H<sub>31</sub>N<sub>4</sub>O<sub>4</sub>S: 423.2066 [M+1]<sup>+</sup>; found: 423.1953.

**(E)-2-(2-(2-(2-(3,5-dimethyl-4-((4-(methylthio)phenyl)diazenyl)-1H-pyrazol-1-**

**yl)ethoxy)ethoxy)ethoxy)ethanol (8):** Yield 60% as a red liquid; <sup>1</sup>H NMR (300 MHz, DMSO-*d*<sub>6</sub>): δ 7.69 (d, *J* = 6.9 Hz, 2H), 7.37 (d, *J* = 8.7 Hz, 2H), 4.55 (t, *J* = 5.2 Hz, 1H), 4.20 (t, *J* = 5.1 Hz, 2H), 3.76 (t, *J* = 5.2 Hz, 2H), 3.51 - 3.43 (m, 12H), 2.57 (s, 3H), 2.54 (s, 3H), 2.38 (s, 3H); <sup>13</sup>C NMR (300 MHz, CDCl<sub>3</sub>): δ 151.10, 142.49, 140.28, 140.15, 134.90, 126.35, 122.23, 72.51, 70.69, 70.59, 70.51, 70.30, 69.88, 61.67, 49.0, 15.66, 14.06, 9.92; LRMS (ESI): *m/z* calcd for C<sub>20</sub>H<sub>31</sub>N<sub>4</sub>O<sub>4</sub>S: 423.2066 [M+1]<sup>+</sup>; found: 423.1975.

**X-ray Crystallography:** Crystals of both **4** and **5** were grown by slow evaporation of mixed solvents MeOH and Et<sub>2</sub>O.

| Compound                            | <b>4</b>                                                      | <b>5</b>                                         |
|-------------------------------------|---------------------------------------------------------------|--------------------------------------------------|
| Identification code                 | CCDC 2006348                                                  | CCDC 2006349                                     |
| Chemical formula                    | C <sub>14</sub> H <sub>18</sub> N <sub>4</sub> S <sub>2</sub> | C <sub>13</sub> H <sub>16</sub> N <sub>4</sub> S |
| Formula weight                      | 306.44                                                        | 260.36                                           |
| Temperature/K                       | 298(2)                                                        | 298(2)                                           |
| Radiation                           | MoK $\alpha$ ( $\lambda$ = 0.71073)                           | MoK $\alpha$ ( $\lambda$ = 0.71073)              |
| Crystal system                      | orthorhombic                                                  | triclinic                                        |
| Space group                         | P 21 21 21                                                    | P -1                                             |
| <i>a</i> /Å                         | 6.8868(8)                                                     | 6.9549(12)                                       |
| <i>b</i> /Å                         | 14.8106(17)                                                   | 8.8714(13)                                       |
| <i>c</i> /Å                         | 15.0914(17)                                                   | 11.149(2)                                        |
| $\alpha$ /°                         | 90                                                            | 80.680(3)                                        |
| $\beta$ /°                          | 90                                                            | 89.072(3)                                        |
| $\gamma$ /°                         | 90                                                            | 84.658(16)                                       |
| <i>Z</i>                            | 4                                                             | 2                                                |
| Volume/Å <sup>3</sup>               | 1539.3(3)                                                     | 675.9(2)                                         |
| Crystal density g/cm <sup>3</sup>   | 1.322                                                         | 1.279                                            |
| $\mu$ /mm <sup>-1</sup>             | 0.342                                                         | 0.228                                            |
| F(000)                              | 648                                                           | 276.0                                            |
| Crystal size/mm <sup>3</sup>        | 0.42 × 0.31 × 0.13                                            | 0.44 × 0.30 × 0.12                               |
| Reflections collected               | 24711                                                         | 10604                                            |
| Independent reflections             | 4357                                                          | 3091                                             |
| T <sub>min</sub> , T <sub>max</sub> | 0.881, 0.957                                                  | 0.921, 0.973                                     |
| Data completeness                   | 1.67/0.95                                                     | 0.986                                            |
| Theta(max)                          | 30.203                                                        | 27.611                                           |
| R(reflections)                      | 0.0339( 4065)                                                 | 0.0726( 2561)                                    |
| wR2(reflections)                    | 0.1148( 4357)                                                 | 0.2251( 3091)                                    |
| <i>S</i>                            | 1.001                                                         | 1.065                                            |



## Absorption spectra and photoswitching:

UV-Vis absorbance spectra and thermal relaxation data were collected on a Shimadzu UV-1900 spectrophotometer or a Pre-configured fiber-optic UV-Vis spectrophotometer (AvaSpec-ULS2048L-USB2-UARS) coupled to a temperature controlled cuvette holder was used. Spectra were acquired in a 1 cm path length quartz cuvette. At an angle of 90° to the measuring beam, the samples were irradiated with LEDs emitting at 365 nm, 400 nm, 475 nm, 450 nm or 530 nm until no further decrease in absorbance in case of *trans*-to-*cis* and increase in absorbance for *cis*-to-*trans* was observed. Various solvents such as DMSO, acetonitrile, ethanol and toluene were used for the photoswitching experiments. However, DMSO solvent was chosen for the following studies.

**(i) Determination of molar extinction coefficient:** To know accurate samples concentrations, <sup>1</sup>H NMR spectra of the compounds (**4-6**) in DMSO-*d*<sub>6</sub> were recorded with a known concentration of 1,2-dichloroethane as the internal standard. These samples with known concentrations were then used to record the UV/Vis absorption spectra to calculate the molar extinction coefficients.

### (ii) Determination of *cis* and *trans* % in PSSs followed by the determination of pure *cis* absorption spectra:

To determine the compositions of photostationary states (PSSs) for the *trans*-*cis* and the *cis*-*trans* isomerisations <sup>1</sup>H-NMR spectroscopy was employed. Solutions of arylazopyrazoles **4-6** (ca. 200 μM - 300 μM) in DMSO-*d*<sub>6</sub> were prepared and <sup>1</sup>H NMR spectra were acquired in the dark state (Fig. 3 and S7-S9). These samples were irradiated by 400 nm LED, 457 nm LED or 530 nm LED light for ca. 10 minutes and spectra of the achieved PSSs were recorded immediately. Signal integration of some distinct aromatic protons or the methyl group led to determine the percentages of *cis* and *trans* isomers. UV-Vis absorption spectra of these solutions were acquired after irradiating them under identical irradiation conditions. These two experiments led to determine the absorption spectra of PSSs and their compositions in terms of the percentages of *cis* and *trans* isomers. Extrapolated spectra of *cis* isomers were calculated from spectra of pure *trans*-isomer and PSS with known compositions.

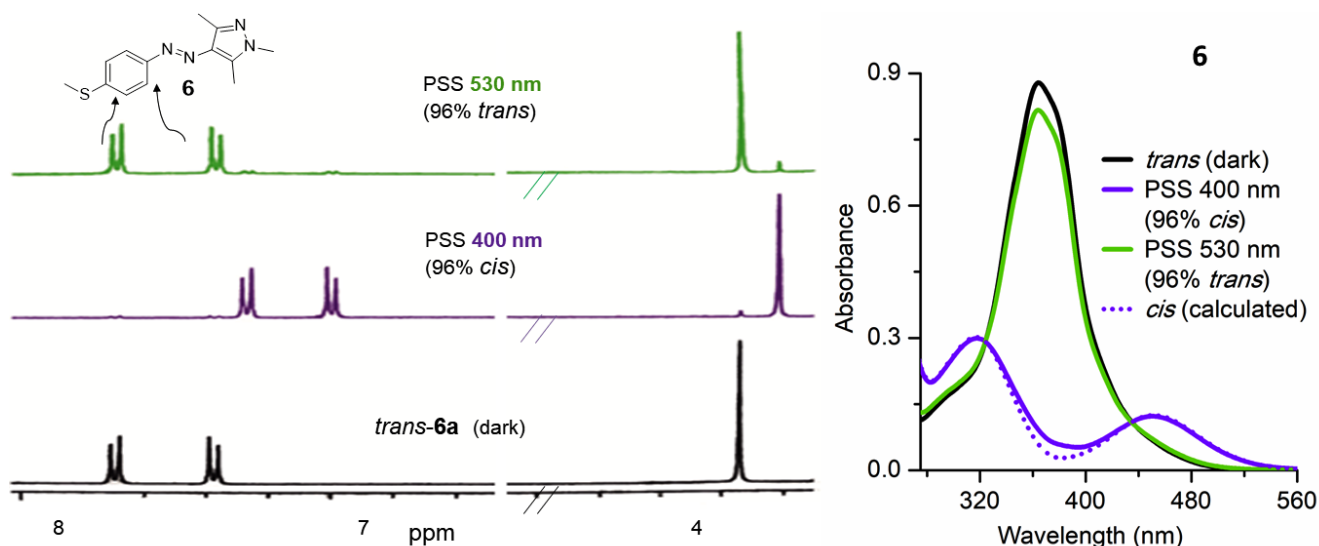

Fig. S7. <sup>1</sup>H NMR spectra of dark adapted state and PSSs of **6** in DMSO-*d*<sub>6</sub>.

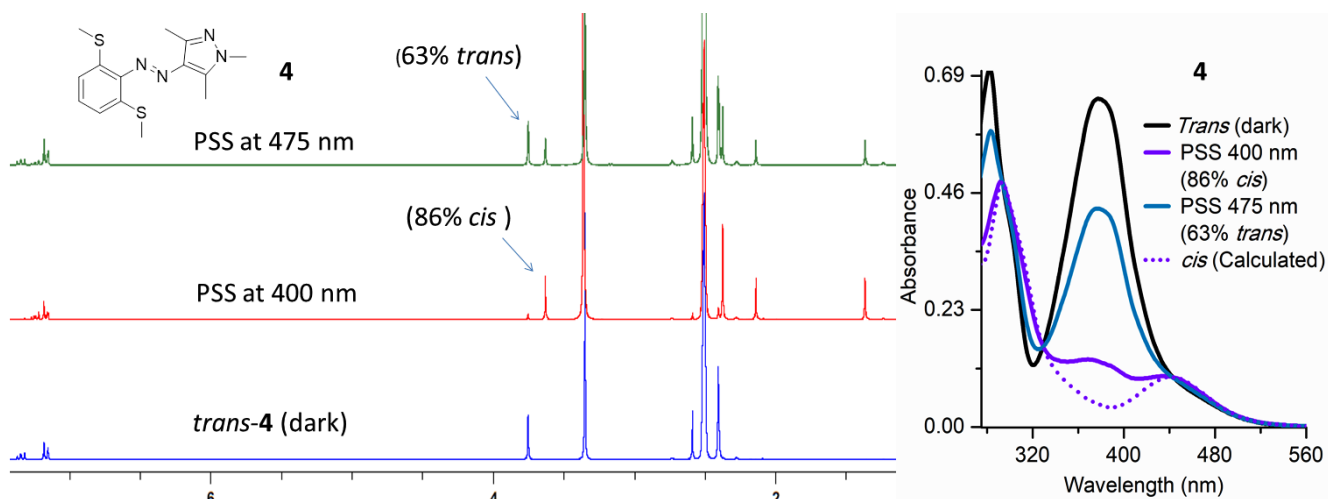

**Fig. S8.**  $^1\text{H}$  NMR spectra of dark adapted state and PSSs of **4** in  $\text{DMSO}-d_6$ .

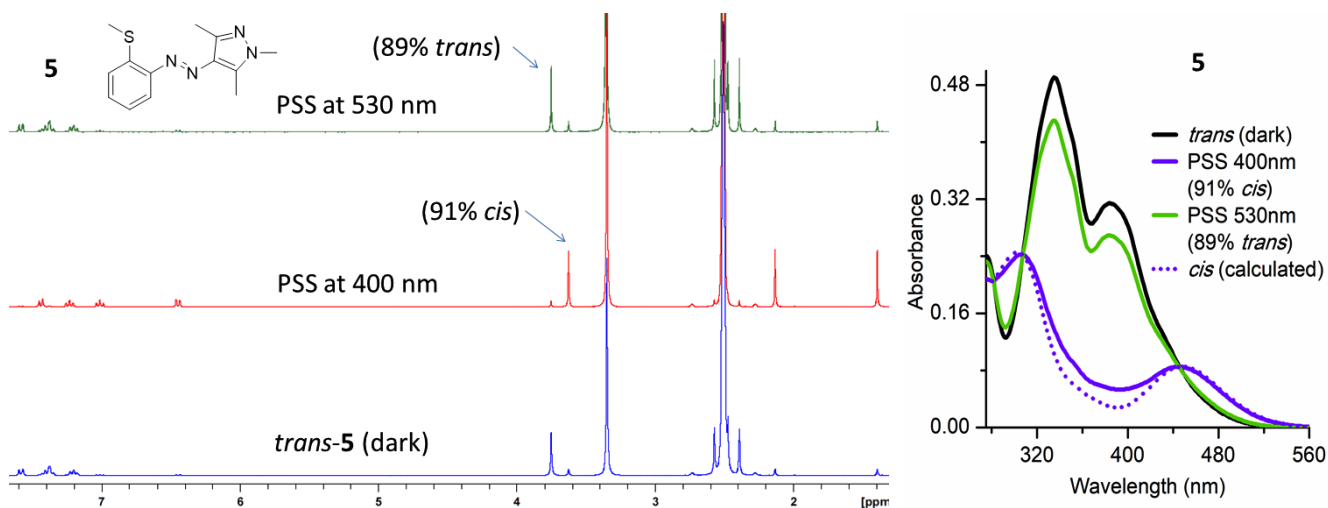

**Fig. S9.**  $^1\text{H}$  NMR spectra of dark adapted state and PSSs of **5** in  $\text{DMSO}-d_6$ .

(iii) Photoswitching in different organic solvents:

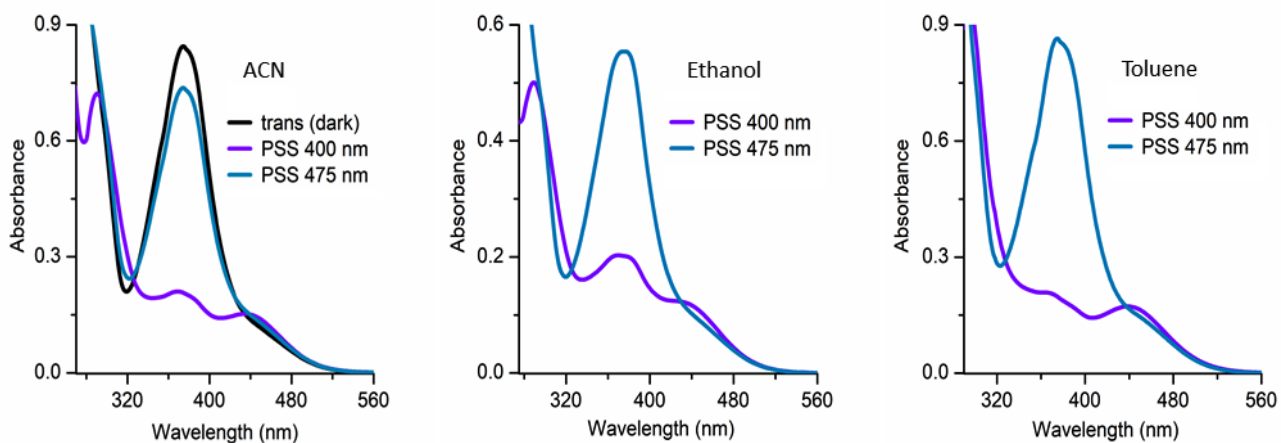

Fig. S10. Photoswitching of **4** in acetonitrile, ethanol and toluene.

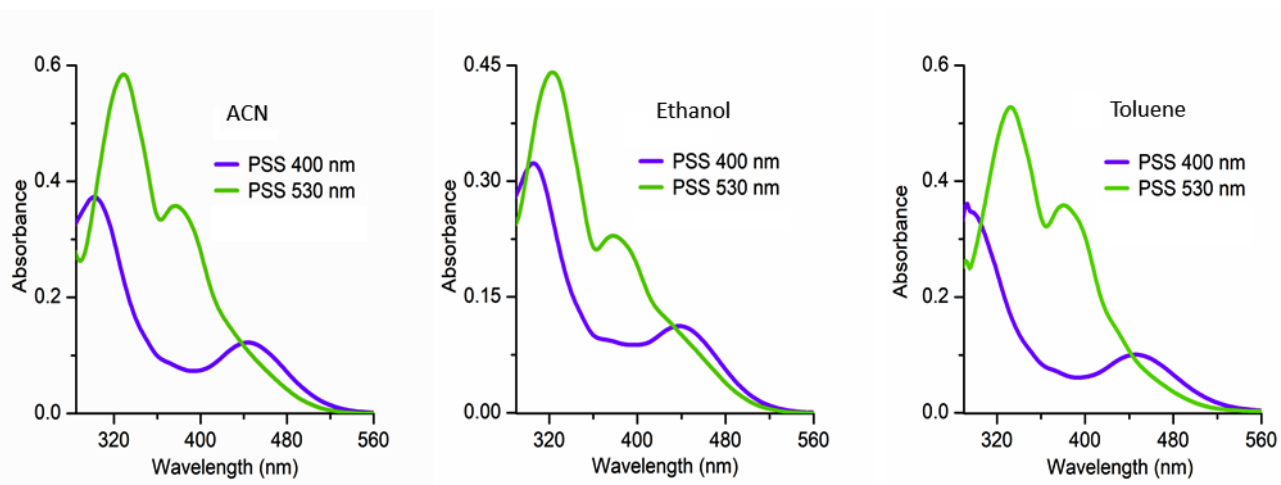

Fig. S11. Photoswitching of **5** in acetonitrile, ethanol and toluene.

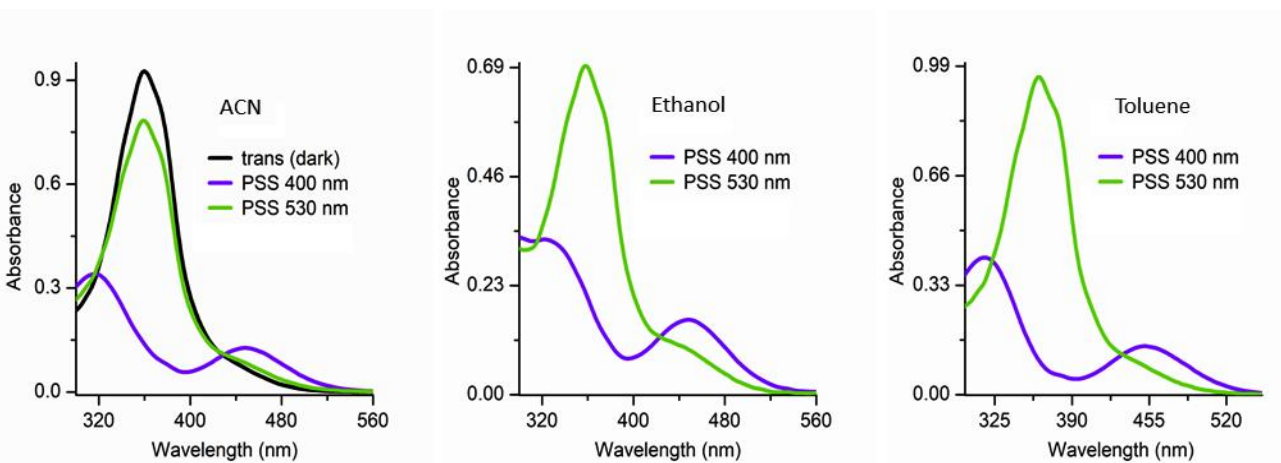

Fig. S12. Photoswitching of **6** in acetonitrile, ethanol and toluene.

**(iv) Determination of thermal half-lives of *cis*-isomers:** This was done in two ways: i) by acquiring UV-Vis absorption spectra of irradiated solutions at a particular time interval (4 h or 6 h), and ii) by recording absorbance at 395 nm as a function of time after irradiating samples at 400 nm in DMSO solvent at 27°C. The resulting curves obtained from both experiments were nicely fitted with mono-exponential functions, resulting in *cis* half-lives of 4-8.

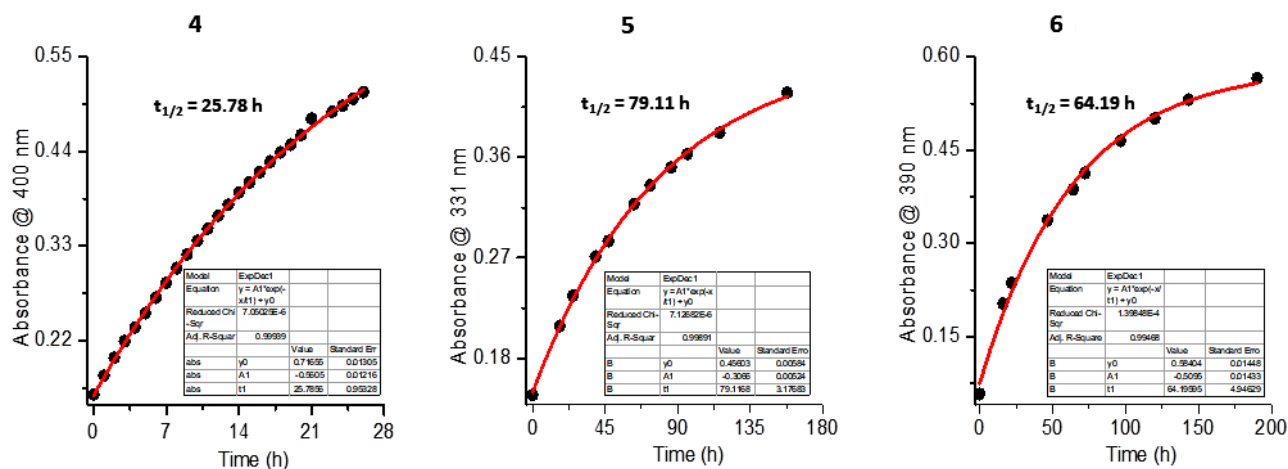

**Fig. S13.** Thermal *cis*-to-*trans* relaxation rates for 4, 5 and 6 at 27°C in DMSO solvent.

**(v) Photobleaching:** To check the photostability, solutions of switches 4-6 in DMSO were exposed to 400 nm and 475 nm /530 nm light alternately. After many cycles of photolysis, considerable photobleaching was not found for any of these switches (Fig. S14).

**Repeated cycles of photoswitching:**

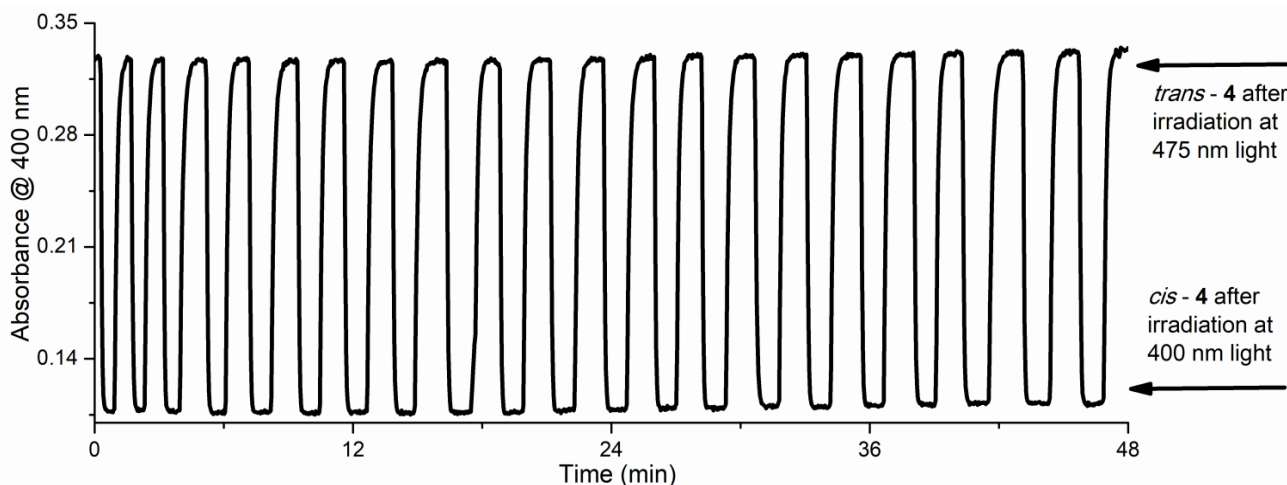

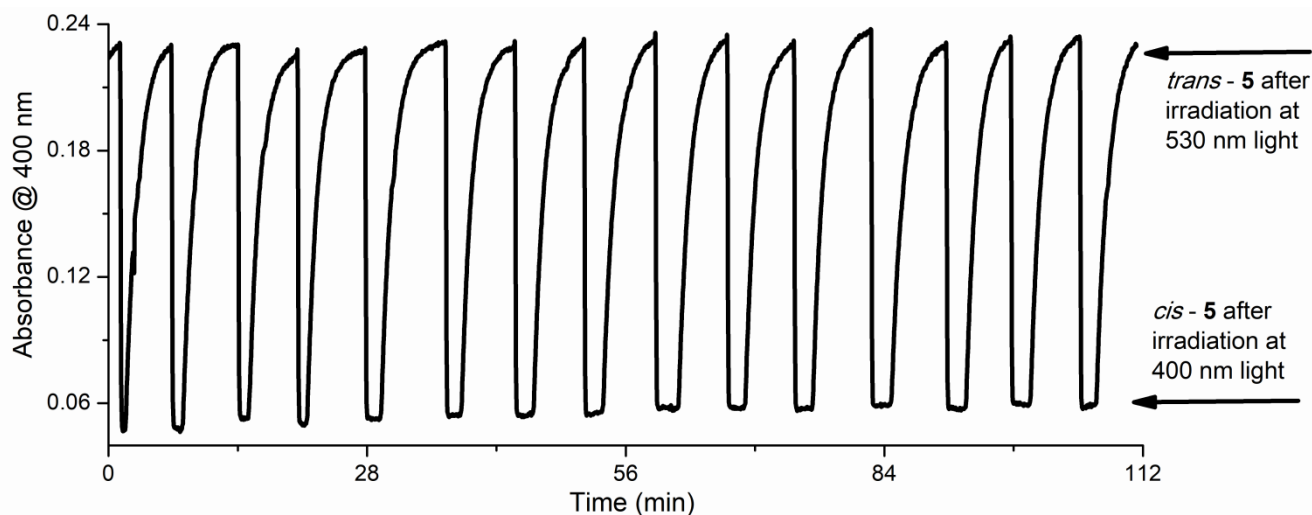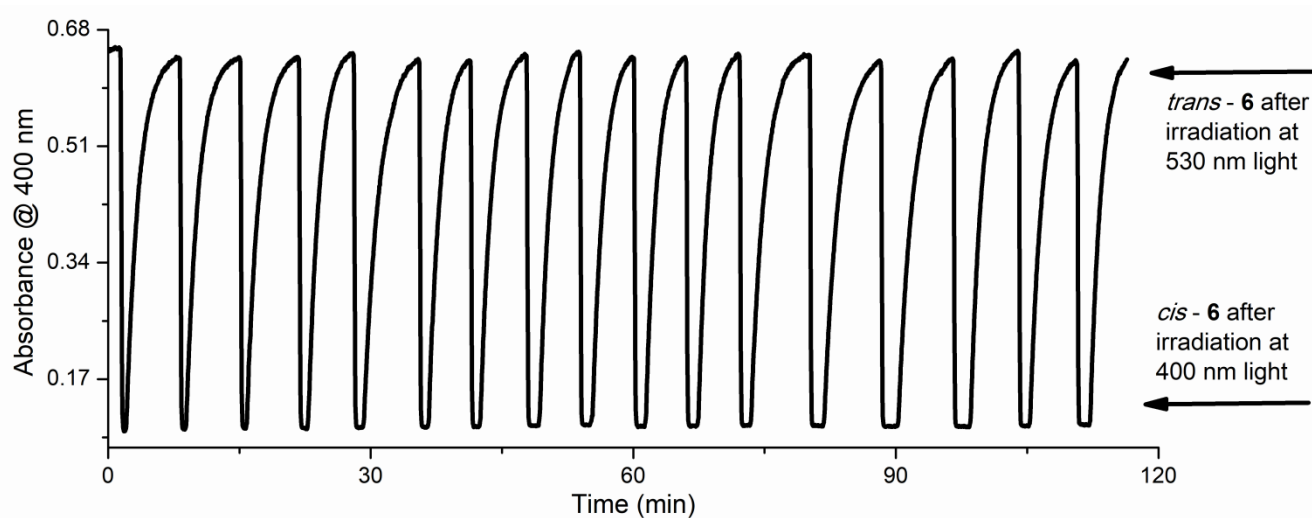

**Fig. S14.** Multiple rounds of photoswitching of 4-6 in DMSO.

**Photoswitching and kinetic studies on AAPZs 7 and 8:**

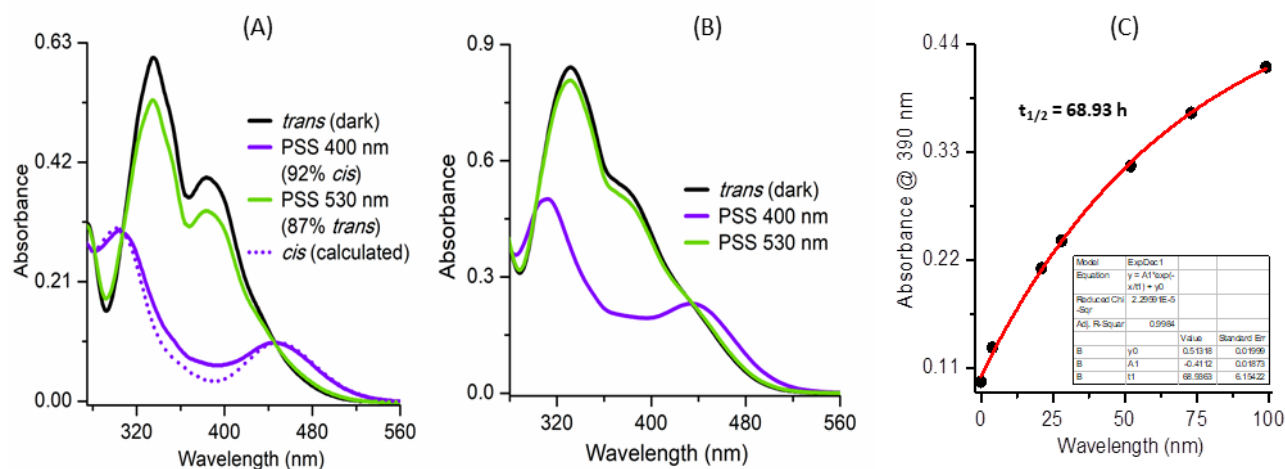

**Fig. S15.** Photoswitching of 7 in DMSO (A) and phosphate buffer (B). Thermal *cis*-to-*trans* relaxation rates in DMSO at 31°C (C).



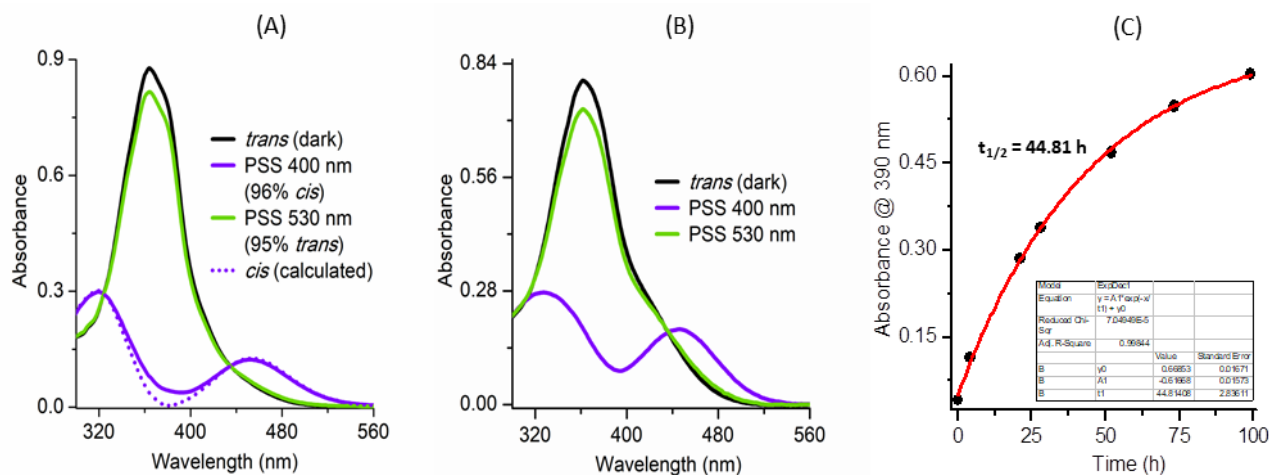

**Fig. S16.** Photoswitching of **8** in DMSO (A) and in phosphate buffer (B). Thermal *cis*-to-*trans* relaxation rates in DMSO at 31°C (C).

**Glutathione stability:** A 50  $\mu$ M solution of *trans*-**7**/**8** in 100 mM sodium phosphate buffer, (pH 7.4) was mixed with 0.25M glutathione to give a final concentration of 10 mM reduced glutathione (GSH). To suppress the GSH self-oxidation, the resulting solution was supplemented with 5 mM TCEP. During the incubation period of 12 h at 31°C, UV-Vis absorption spectra were recorded every 4 h interval in a Shimadzu uv-1900 spectrophotometer (Fig. S17). Similarly, *cis*-**8** was incubated with 10 mM GSH for 2 h, and absorption spectrum of the mixed solution was collected every 1 h interval (Fig. 3B). No reduction of the absorption intensity was noticed, suggesting that compound **7** and **8** are stable to reduction by glutathione. Finally, multiple rounds of photoswitching were tested by alternating irradiation of these solutions with violet and green. Photoswitching behaviour of **7**/**8** remained unchanged after GSH treatment as shown in Fig. S17.

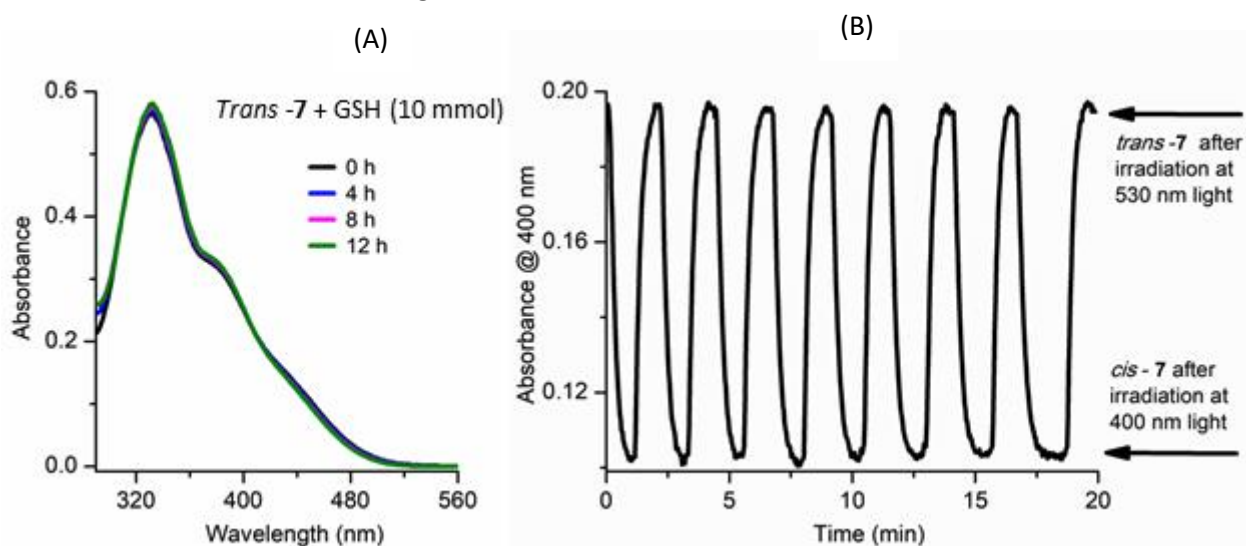

**Fig. S17.** UV-vis absorption scans of *trans*-**7** (A) incubated with 10 mM GSH and TCEP (5 mmol) in phosphate buffer (pH 7.4) at 31°C; spectra were acquired at 4h intervals over a period of 12 h. After this, multiple rounds of photoswitching were carried out upon alternating exposure to 400 nm and 530 nm light for *trans*-**7** (B).

<sup>1</sup>H and <sup>13</sup>C NMR spectra of all compounds:

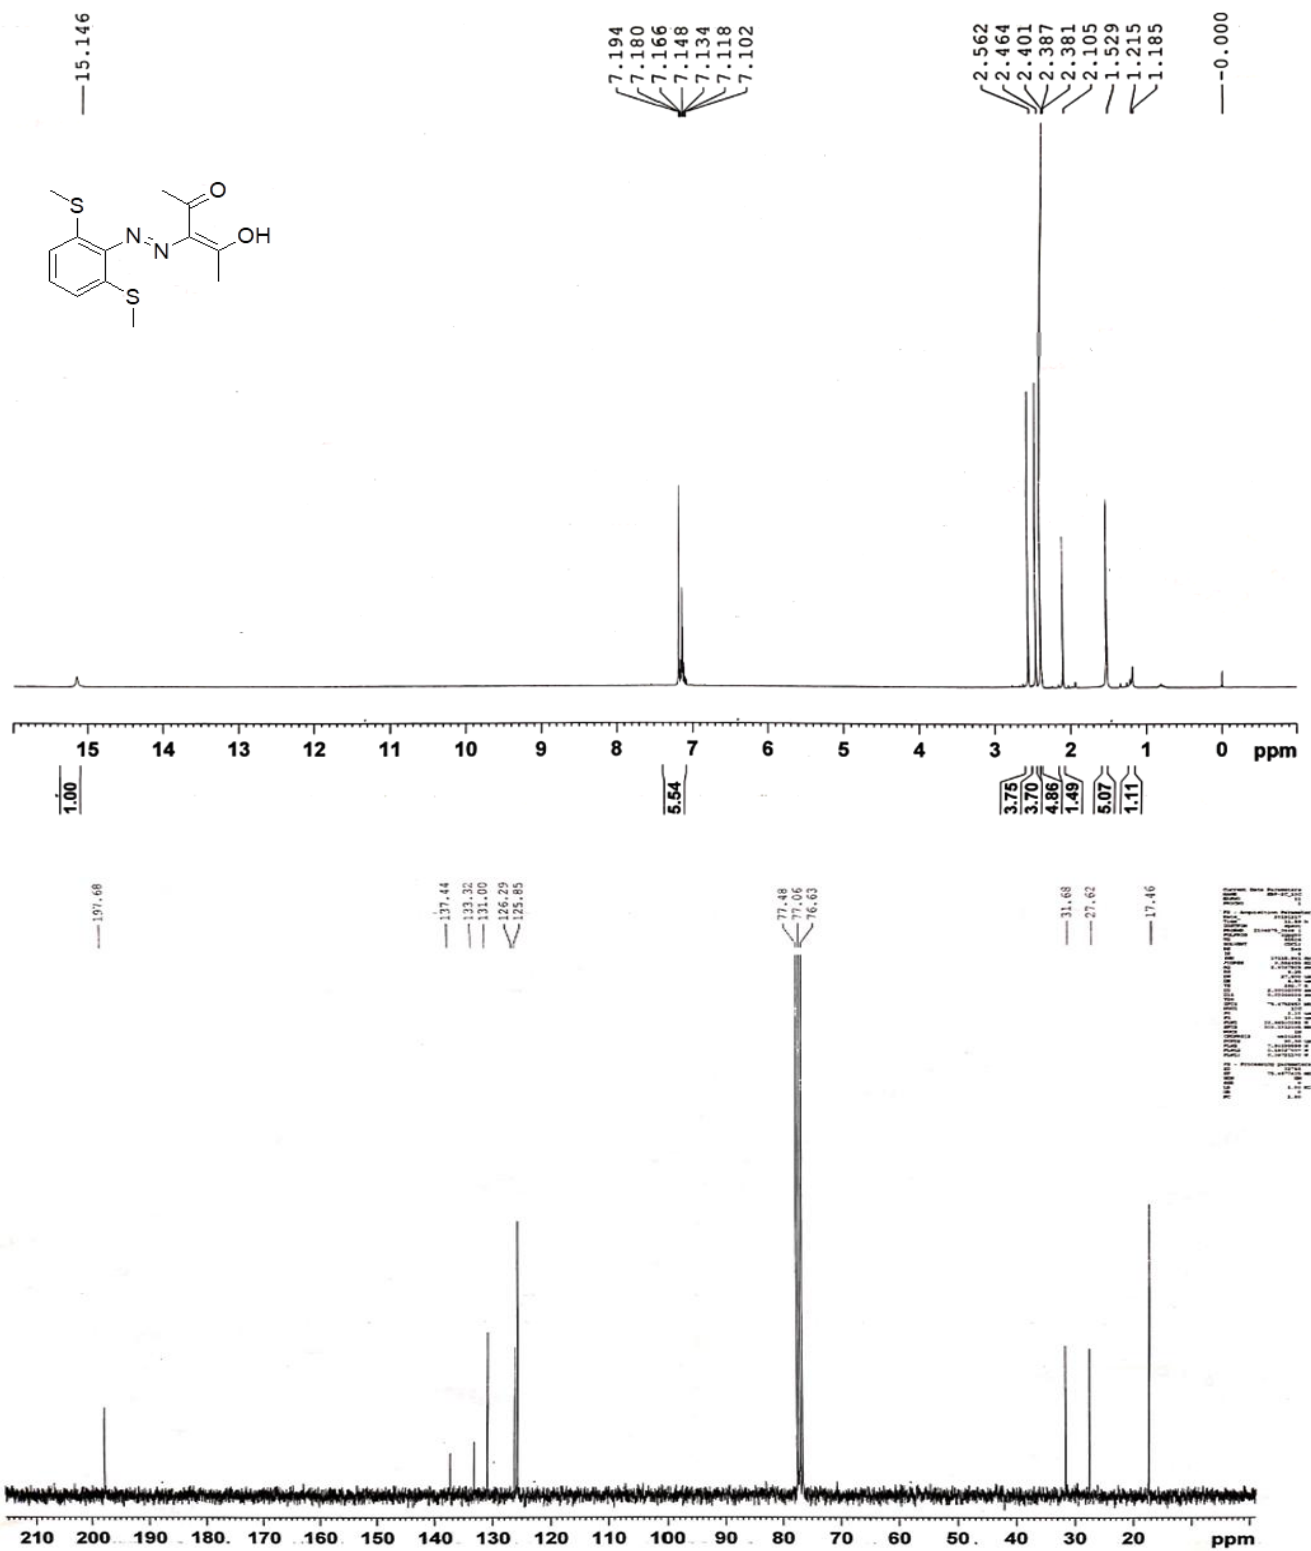

**Fig. S18.** <sup>1</sup>H and <sup>13</sup>C NMR spectra of (*E*)-3-((*E*)-(2,6-bis(methylthio)phenyl)diazenyl)-4-hydroxypent-3-en-2-one (**10a**) in CDCl<sub>3</sub>.

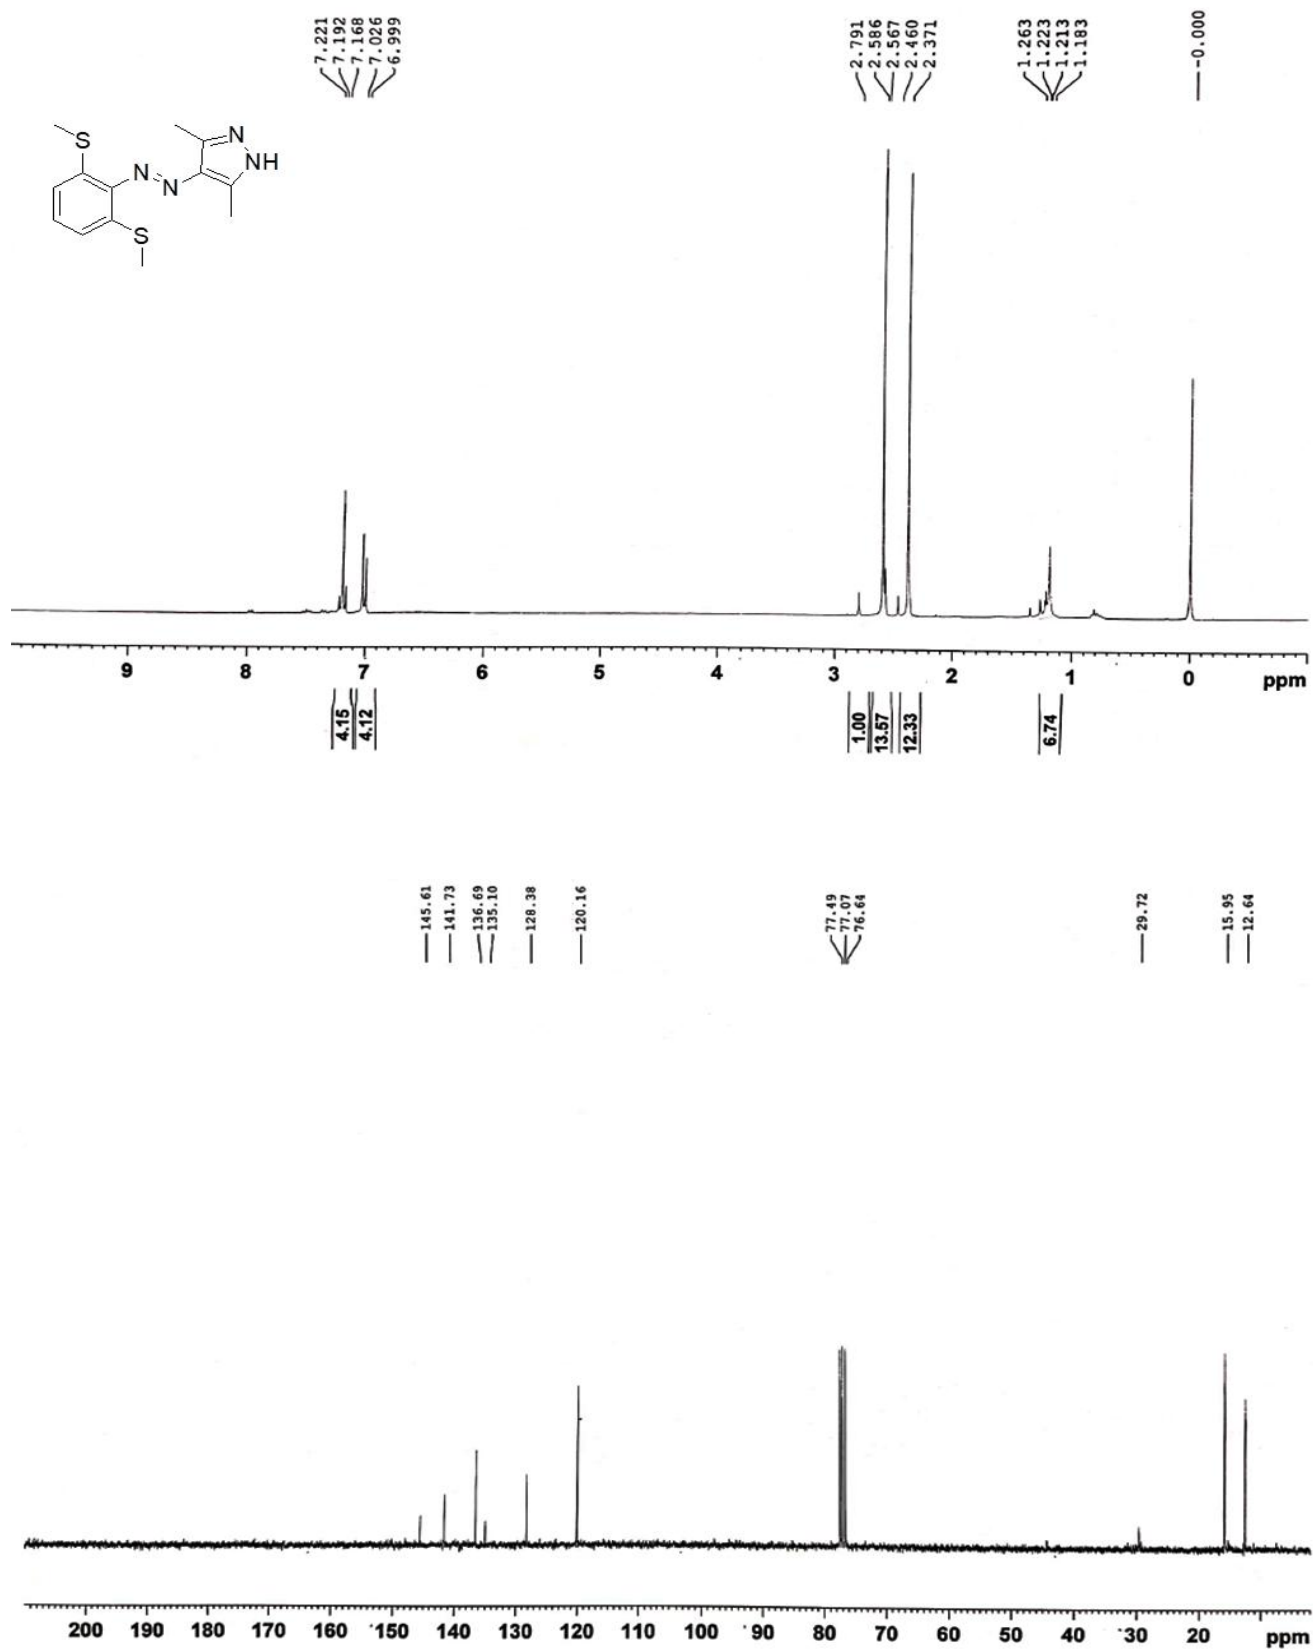

**Fig. S19.** <sup>1</sup>H and <sup>13</sup>C NMR spectra of (*E*)-4-((2,6-bis(methylthio)phenyl)diazenyl)-3,5-dimethyl-1H-pyrazole (**9a**) in CDCl<sub>3</sub>.

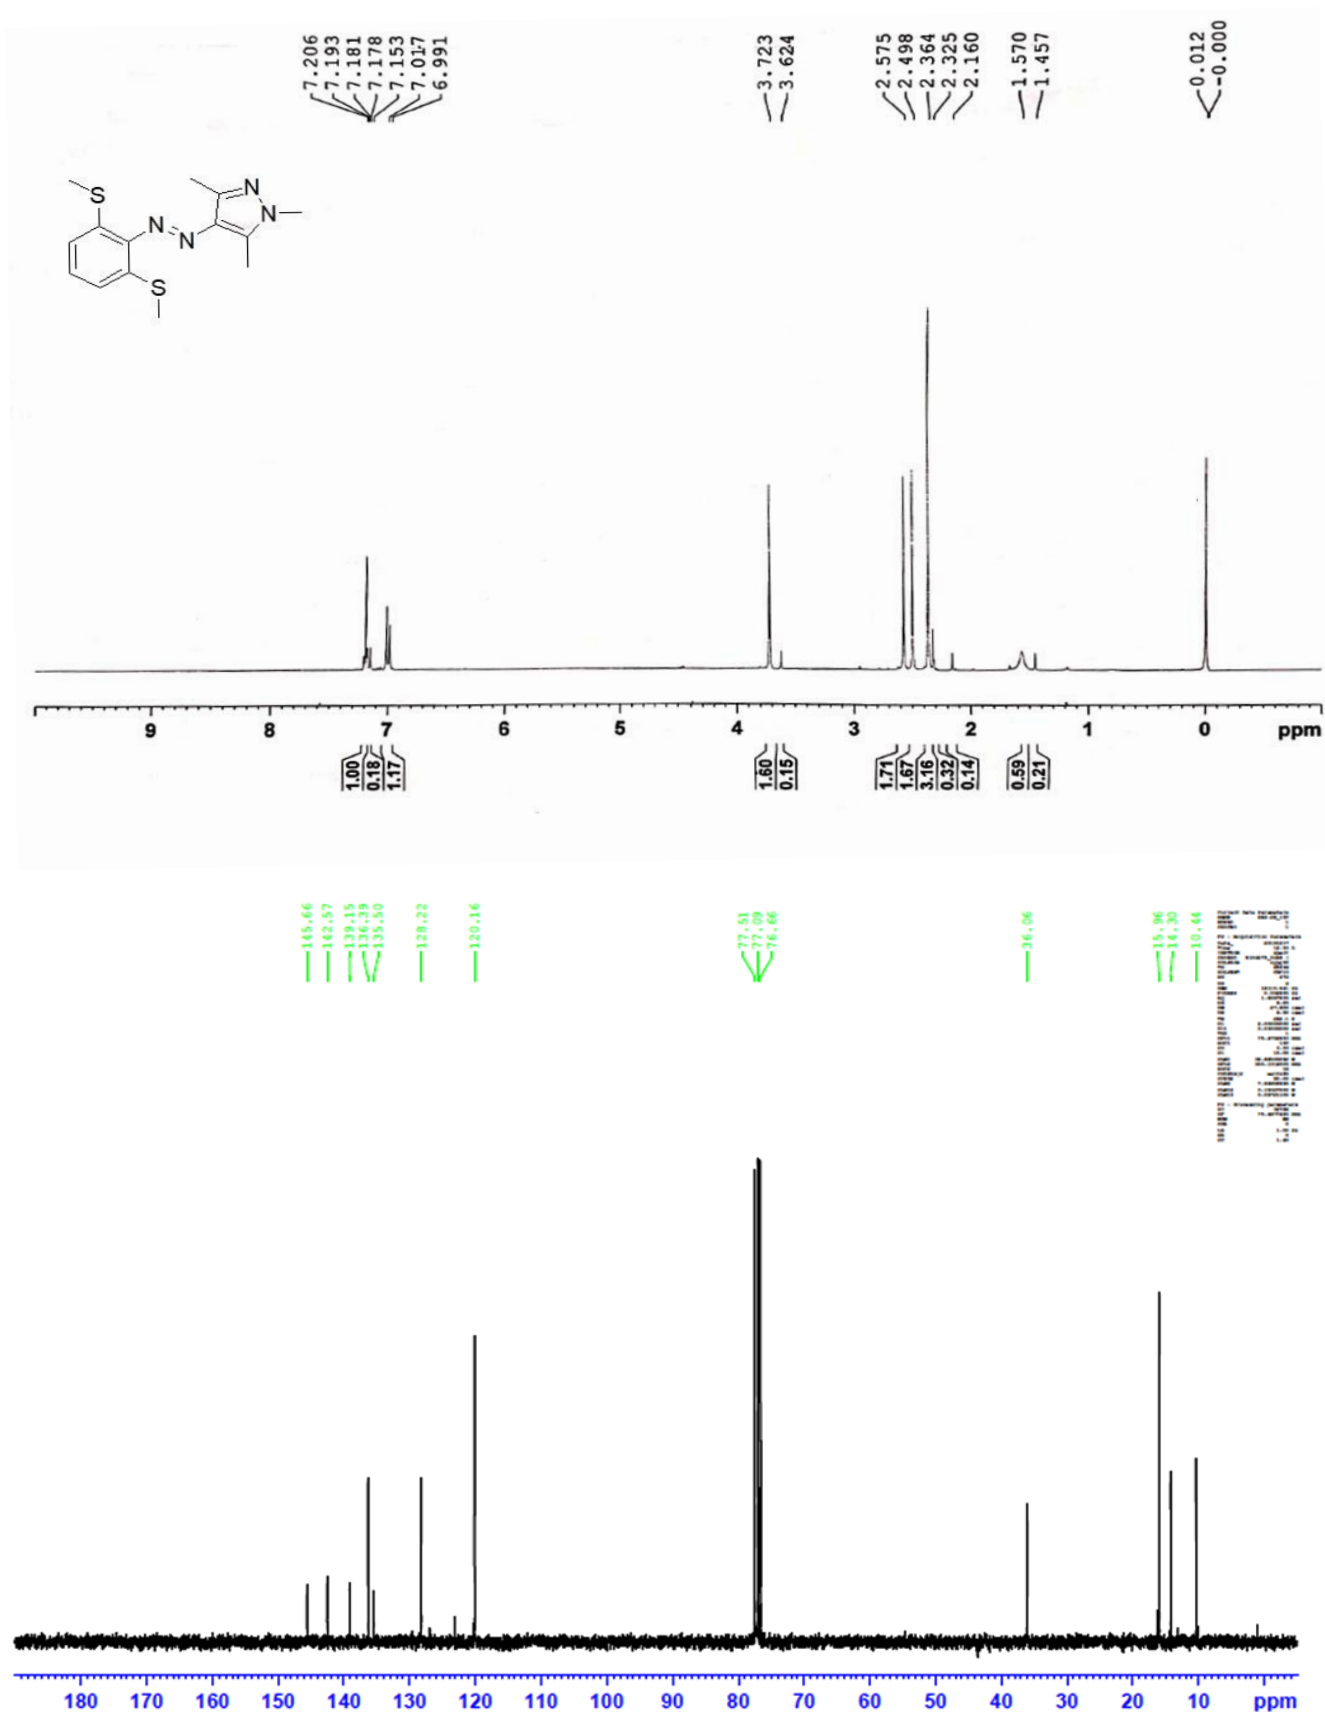

**Fig. S20.** <sup>1</sup>H and <sup>13</sup>C NMR spectra of (*E*)-4-((2,6-bis(methylthio)phenyl)diazenyl)-1,3,5-trimethyl-1H-pyrazole (**4**) in CDCl<sub>3</sub>.

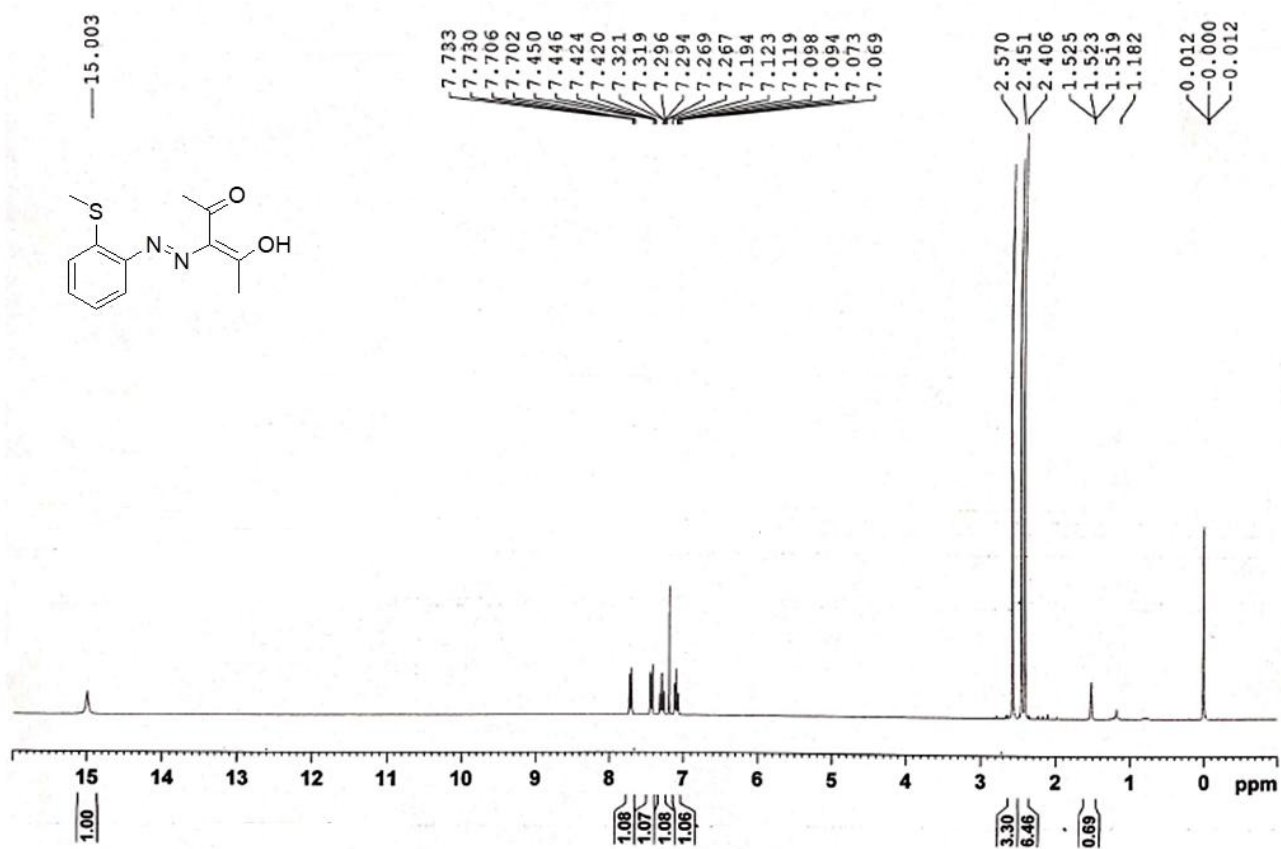

**Fig. S21.** <sup>1</sup>H NMR spectrum of (*E*)-4-hydroxy-3-((*E*)-(2-(methylthio)phenyl)diazenyl)pent-3-en-2-one (**10b**) in CDCl<sub>3</sub>.



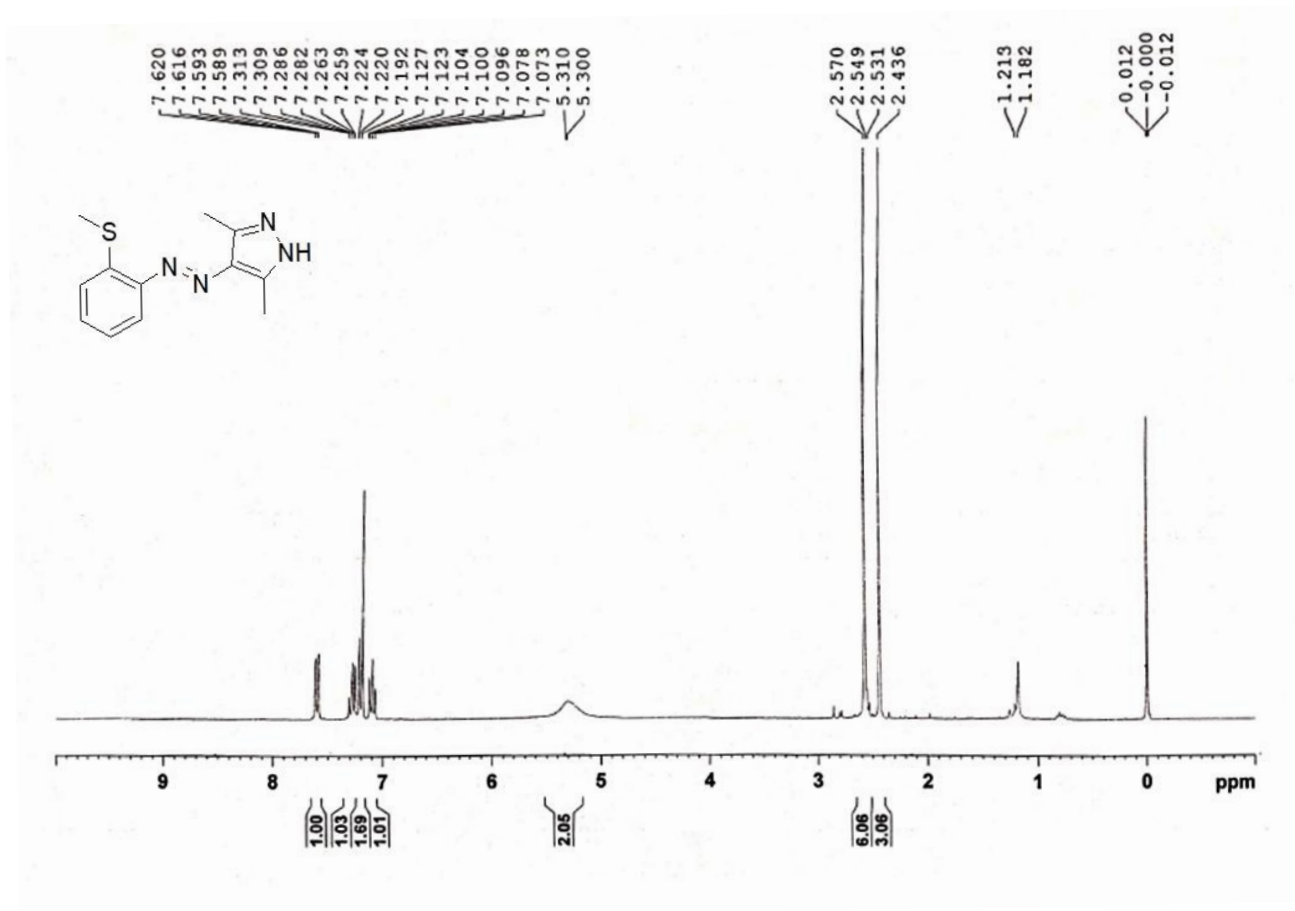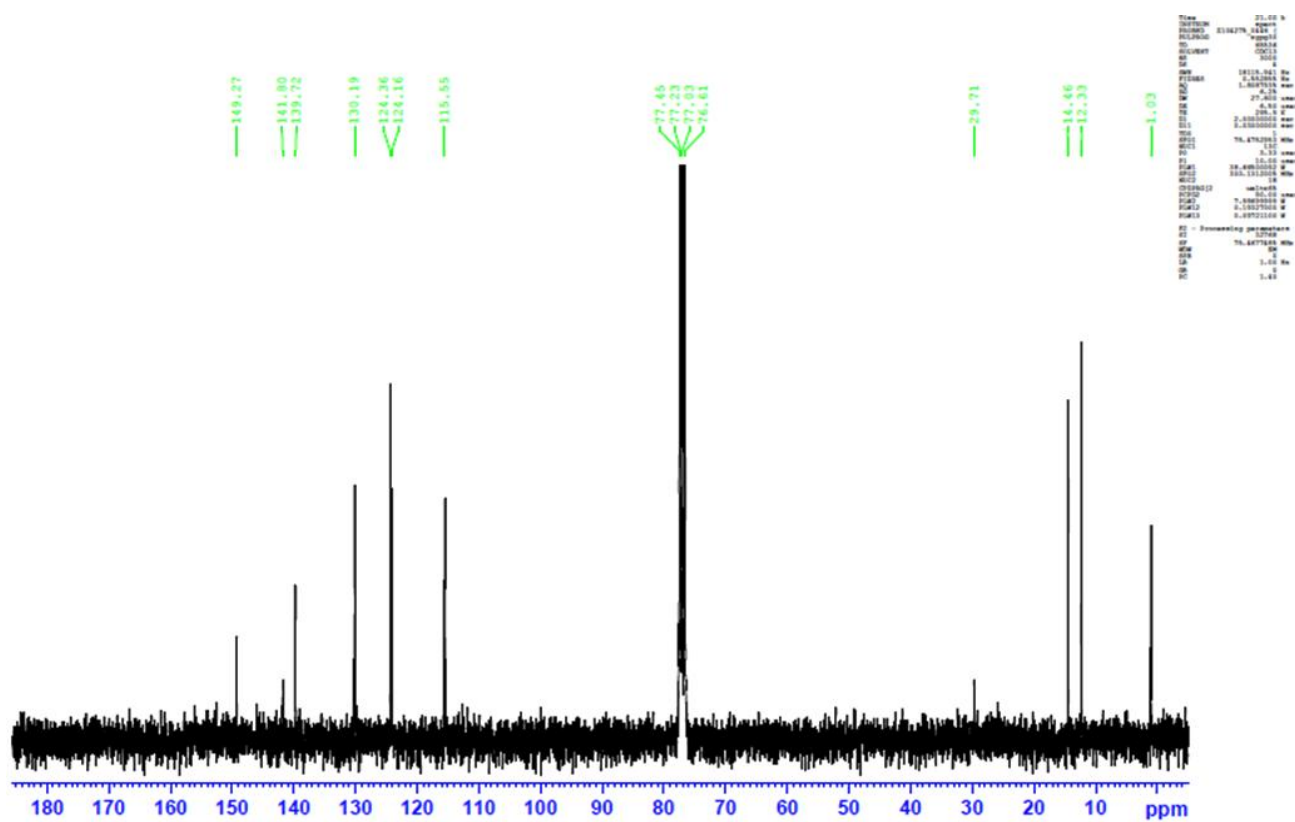

Fig. S22. <sup>1</sup>H and <sup>13</sup>C NMR spectra of (*E*)-3,5-dimethyl-4-((2-(methylthio)phenyl)diazenyl)-1H-pyrazole (**9b**) in CDCl<sub>3</sub>.

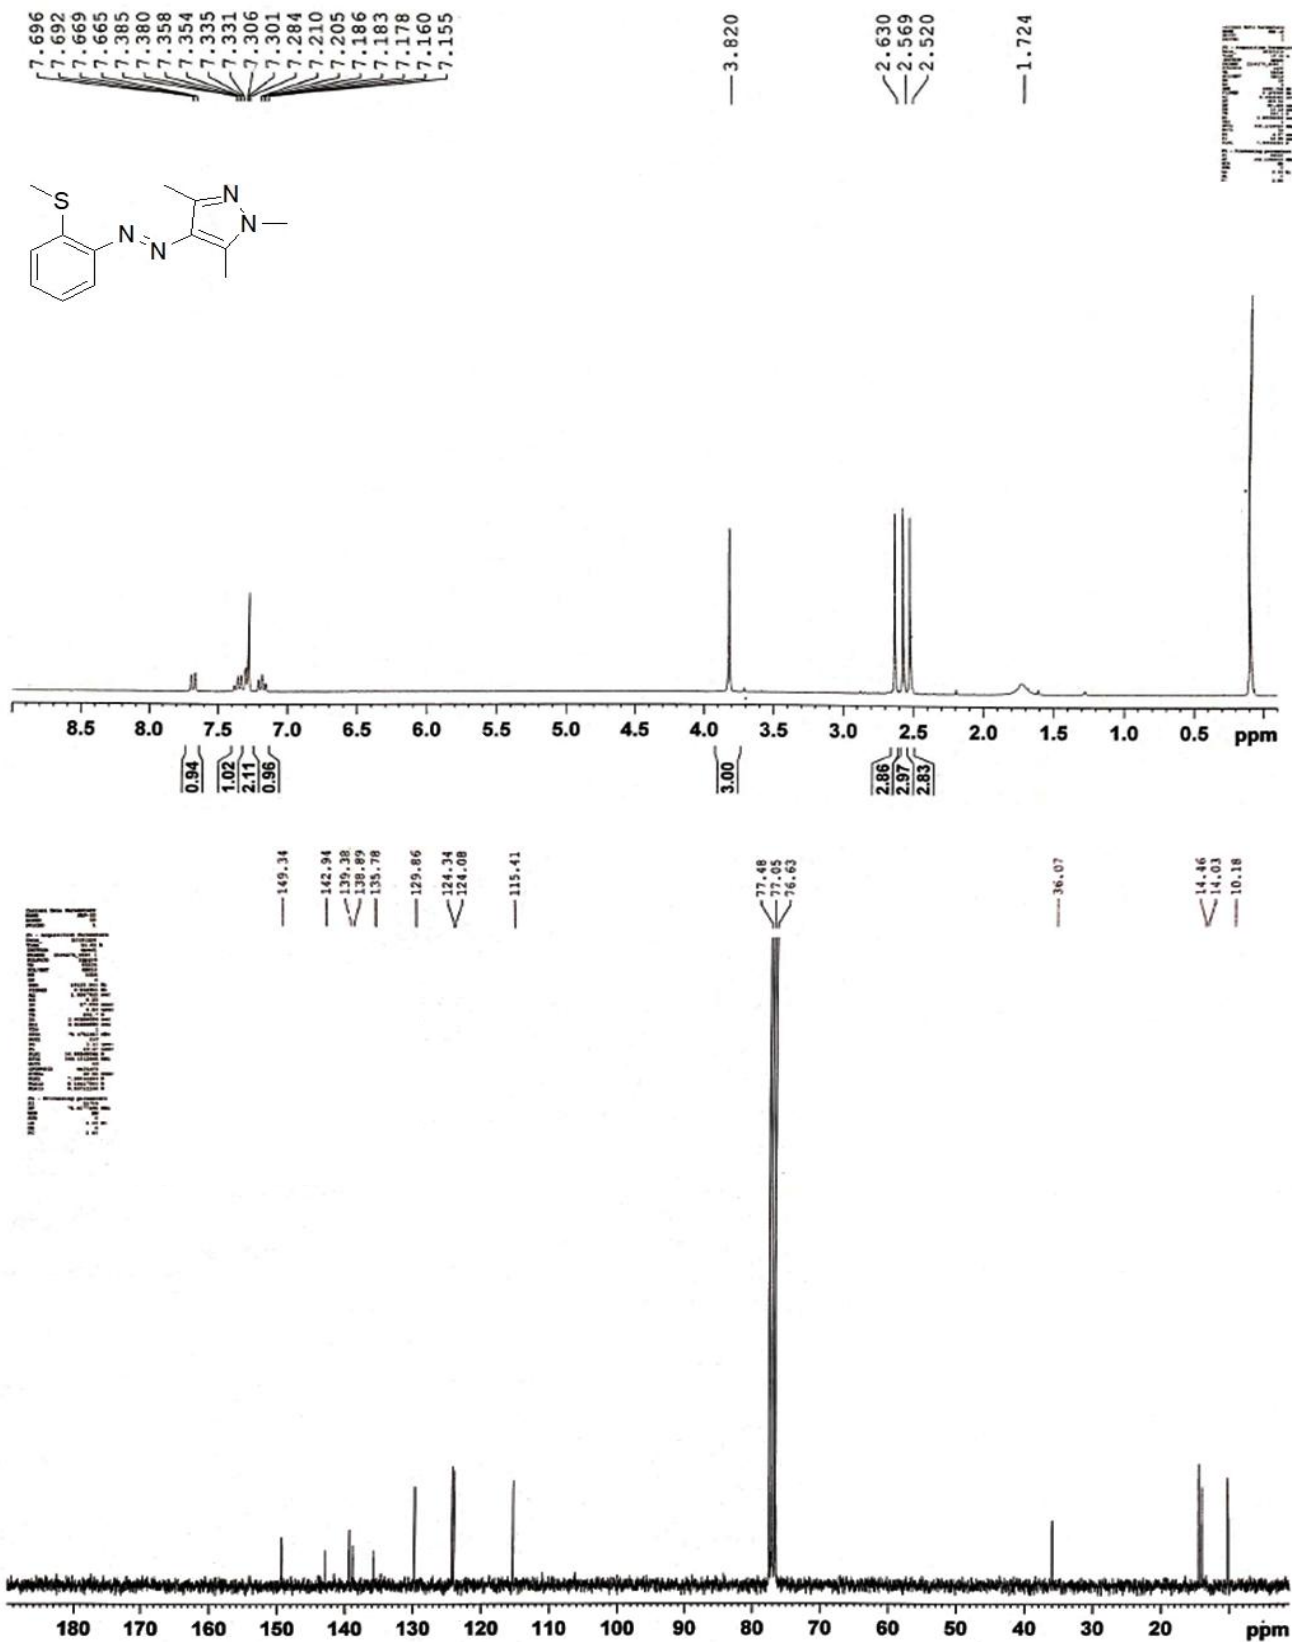

**Fig. S23.** <sup>1</sup>H and <sup>13</sup>C NMR spectra of (*E*)-1,3,5-trimethyl-4-((2-(methylthio)phenyl)diazenyl)-1H-pyrazole (5) in CDCl<sub>3</sub>.

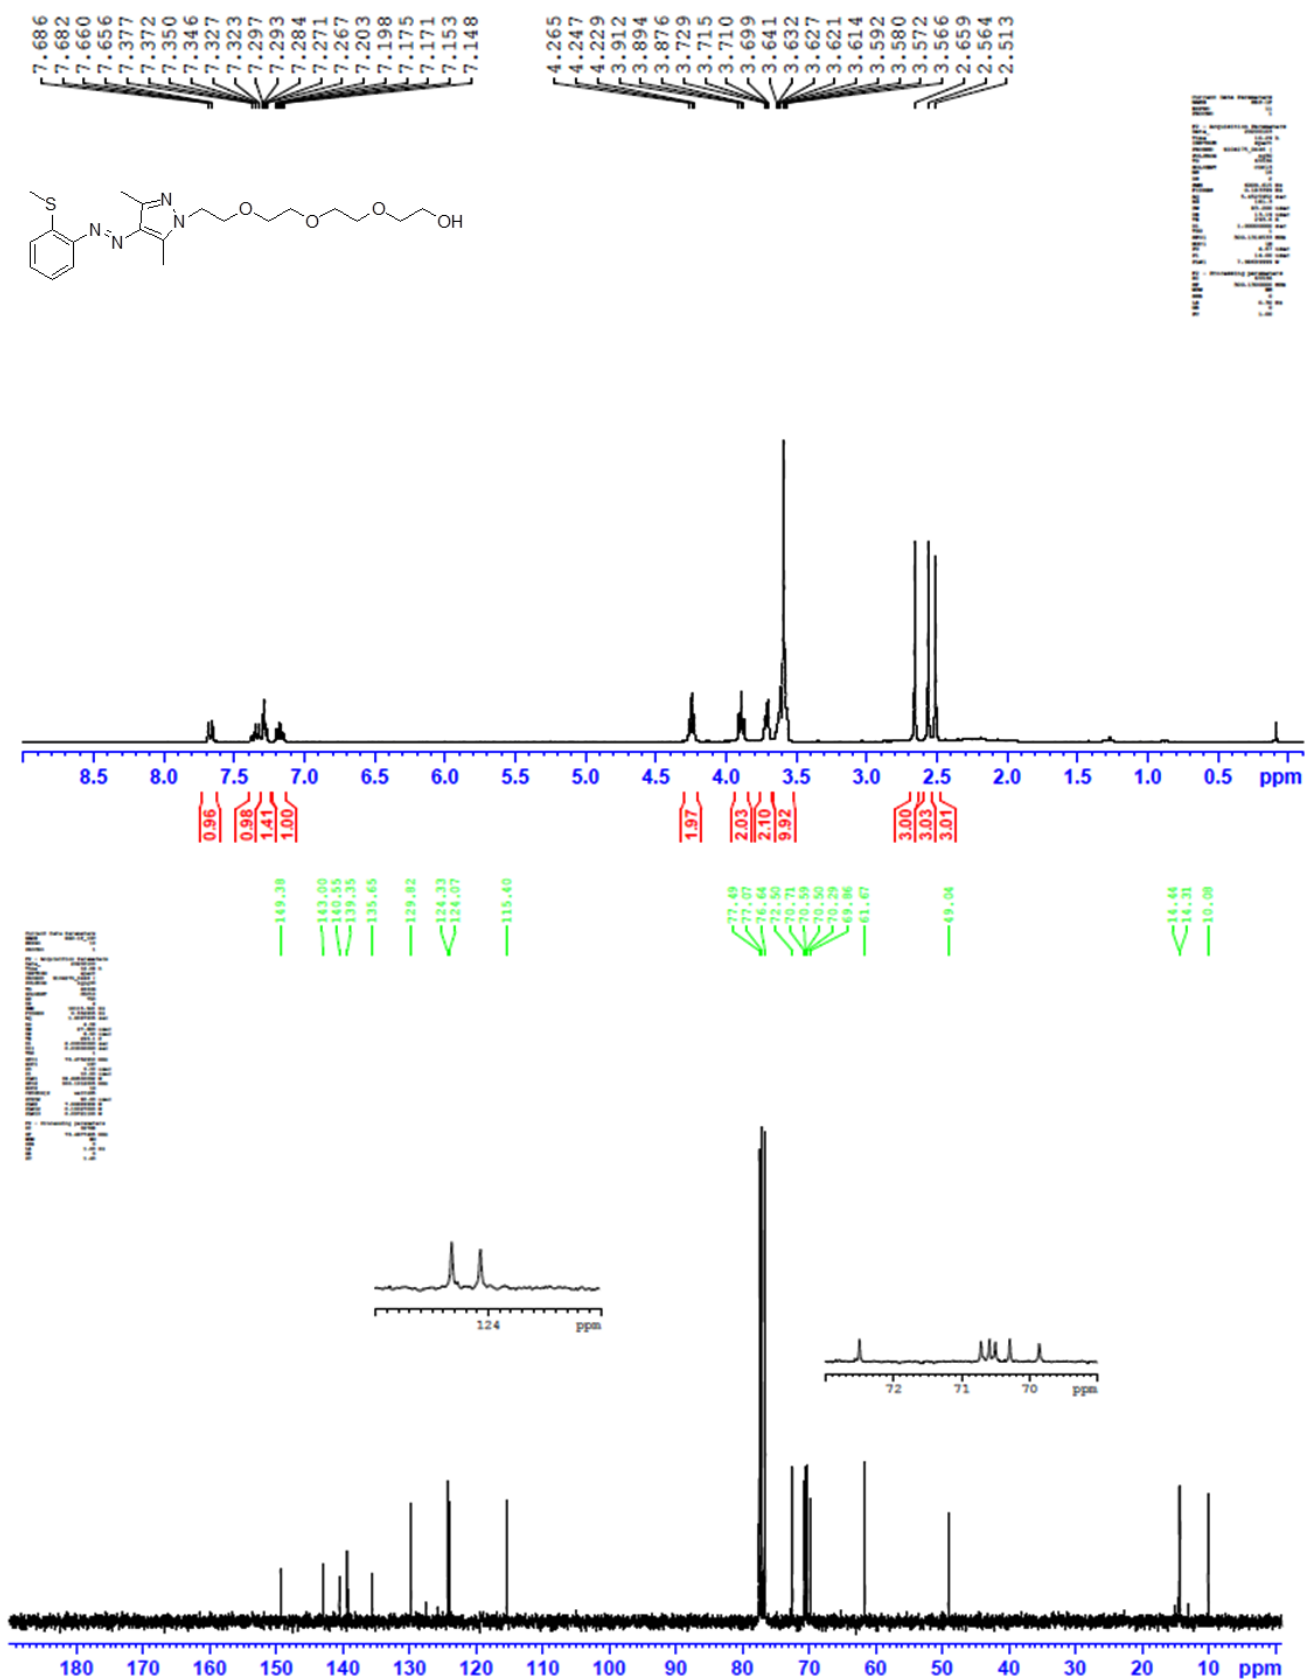

**Fig. S24.** <sup>1</sup>H and <sup>13</sup>C NMR spectra of (*E*)-2-(2-(2-(2-(3,5-dimethyl-4-((2-(methylthio)phenyl)diazenyl)-1H-pyrazol-1-yl)ethoxy)ethoxy)ethoxy)ethanol (**7**) in CDCl<sub>3</sub>.

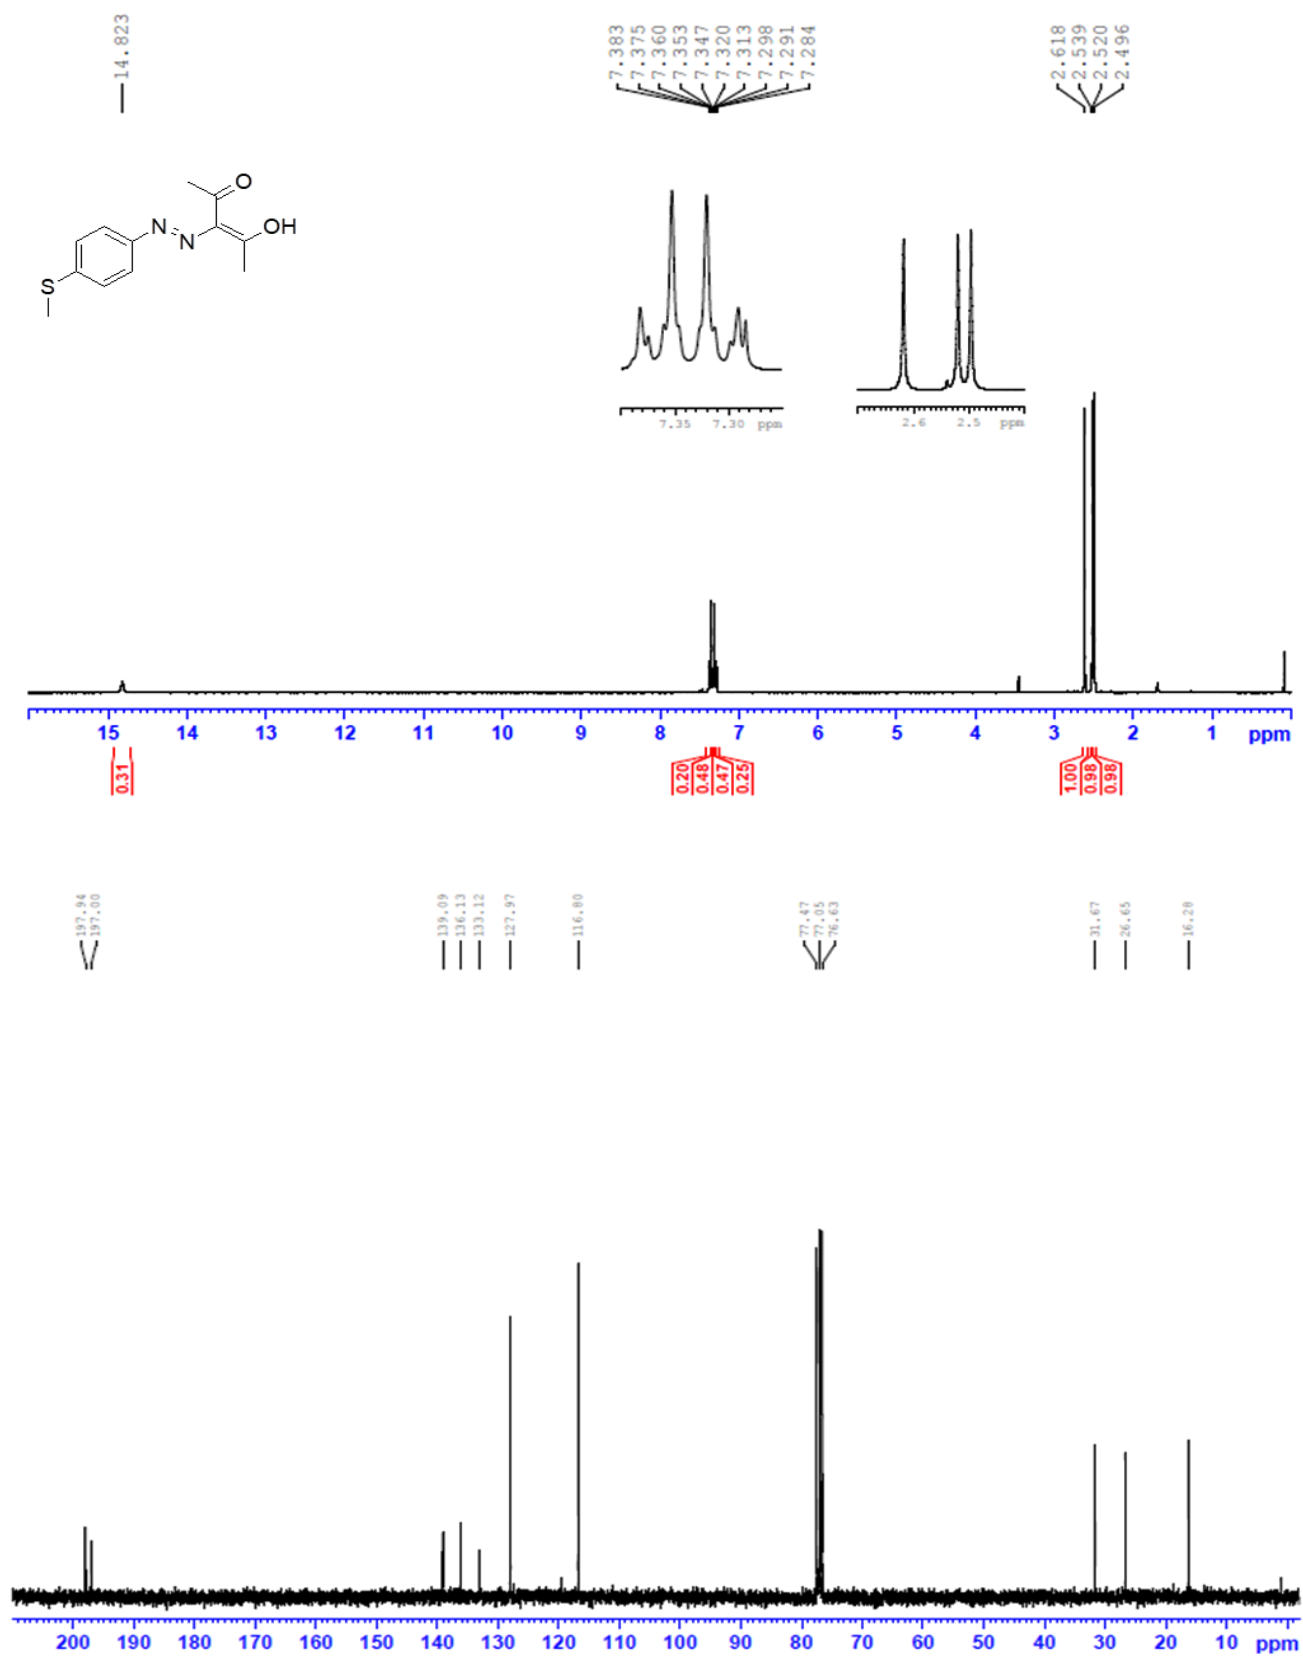

**Fig. S25.** <sup>1</sup>H and <sup>13</sup>C NMR spectra of (*E*)-4-hydroxy-3-((*E*)-(4-(methylthio)phenyl)diazenyl)pent-3-en-2-one (**10c**) in CDCl<sub>3</sub>.

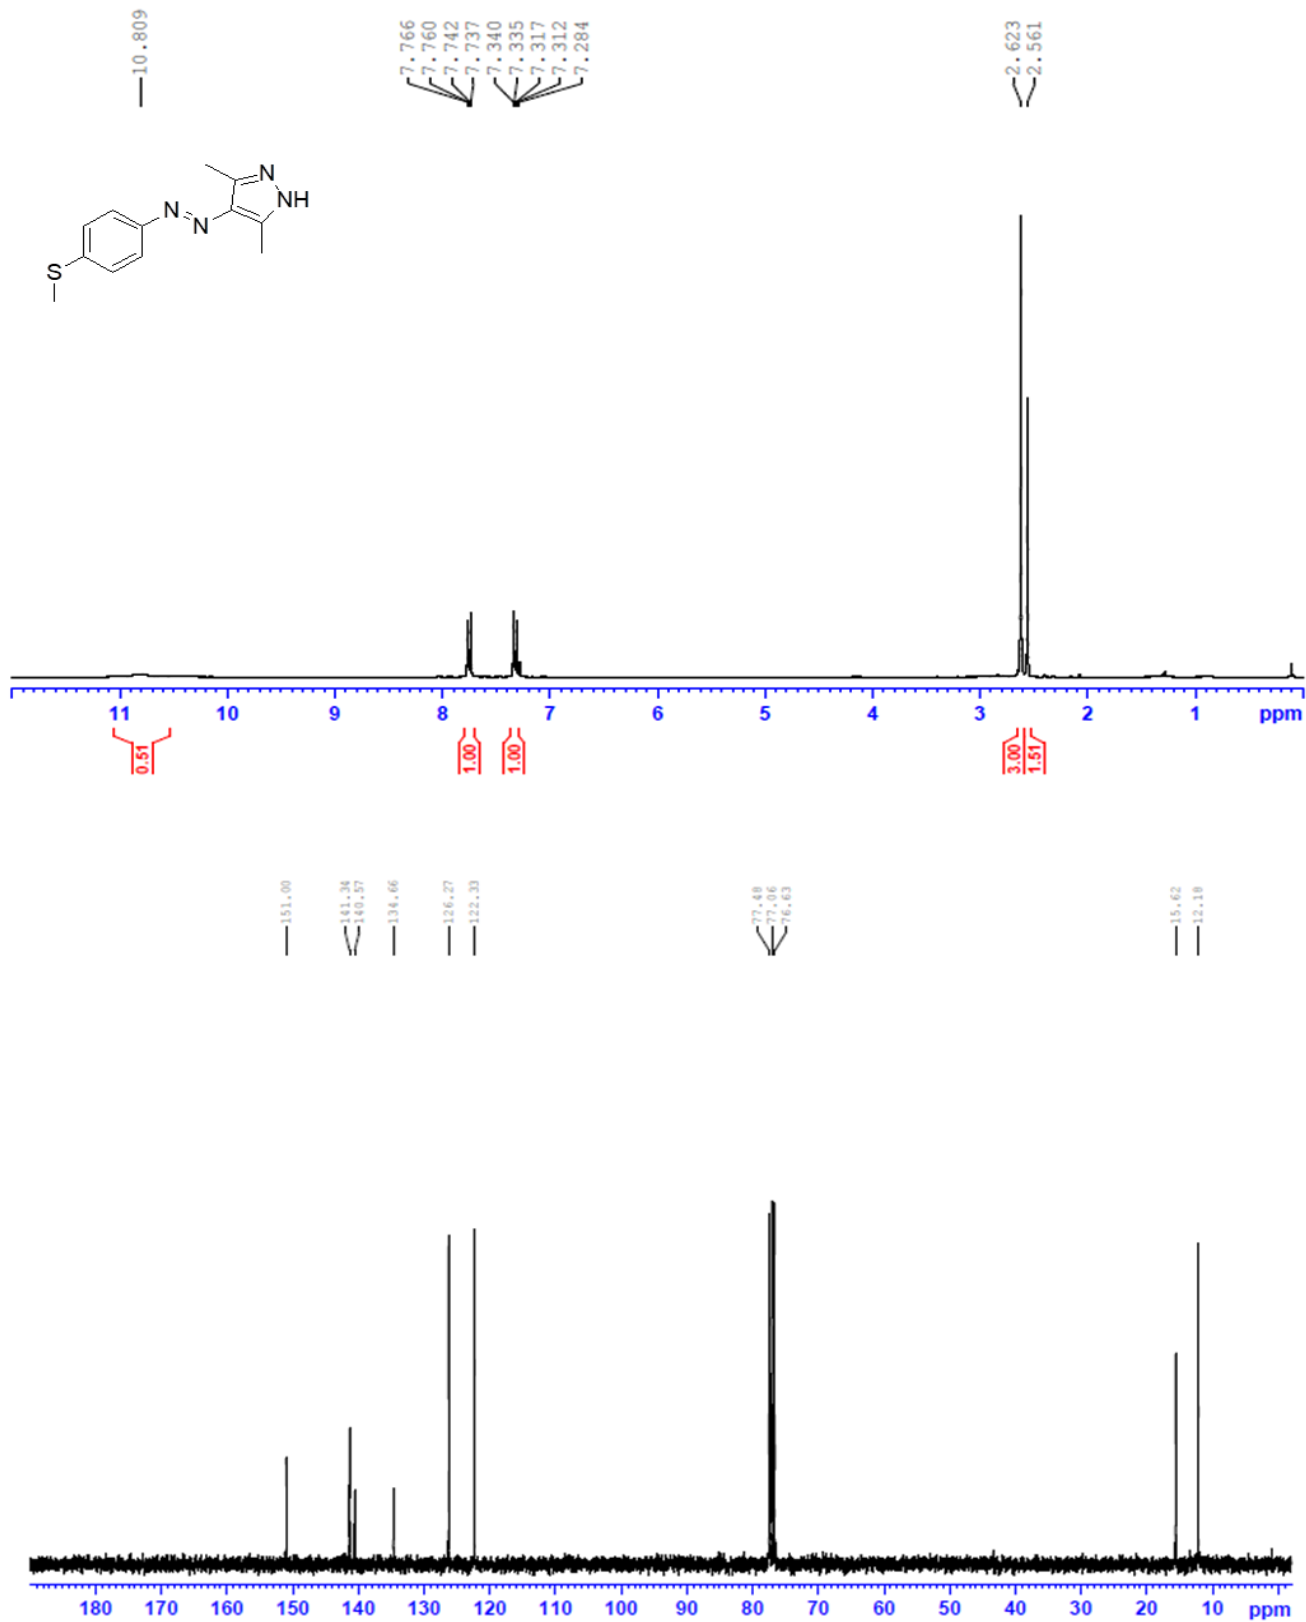

**Fig. S26.** <sup>1</sup>H and <sup>13</sup>C NMR spectra of *(E)*-3,5-dimethyl-4-((4-(methylthio)phenyl)diazenyl)-1H-pyrazole(9c) in CDCl<sub>3</sub>.



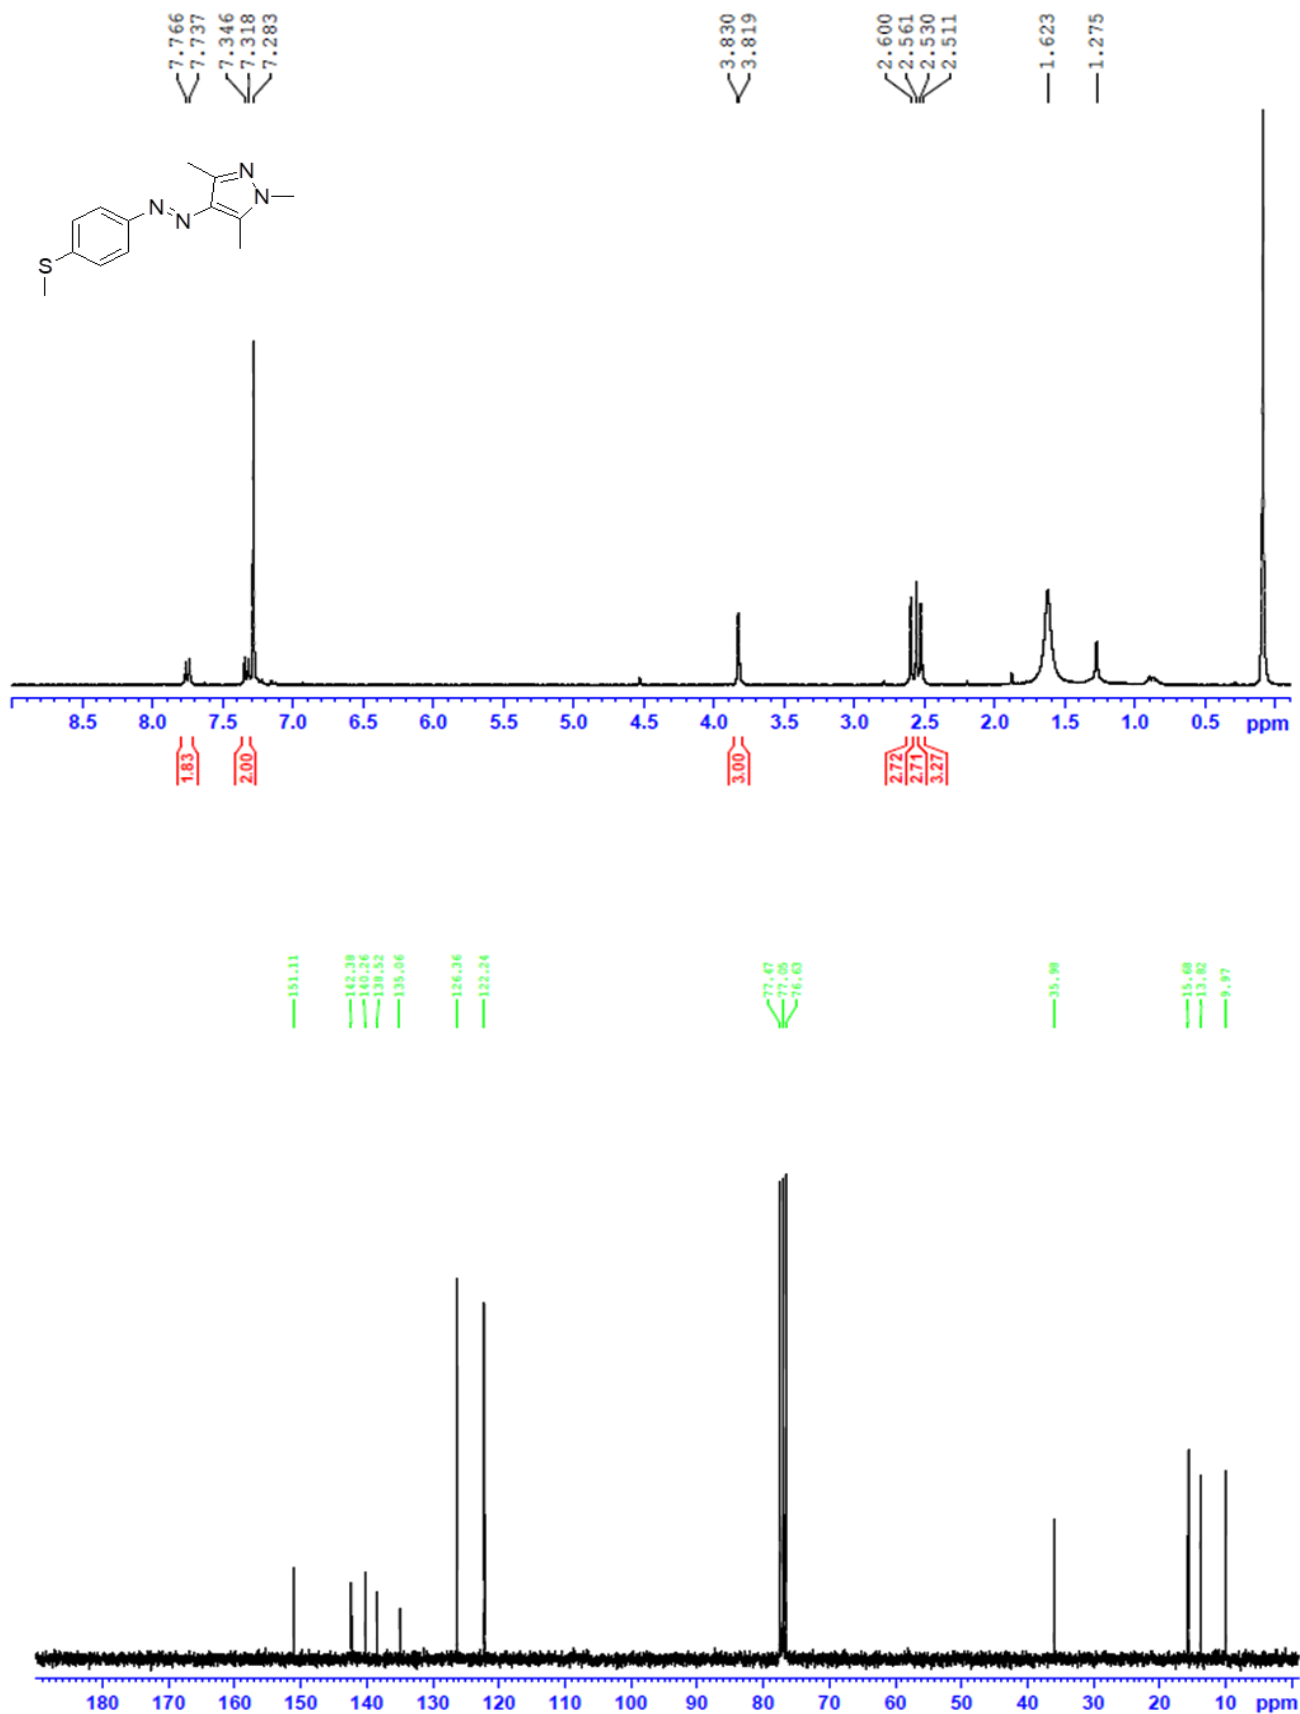

**Fig. S27.** <sup>1</sup>H and <sup>13</sup>C NMR spectra of *(E)*-1,3,5-trimethyl-4-((4-(methylthio)phenyl)diazenyl)-1H-pyrazole (**6**) in CDCl<sub>3</sub>.

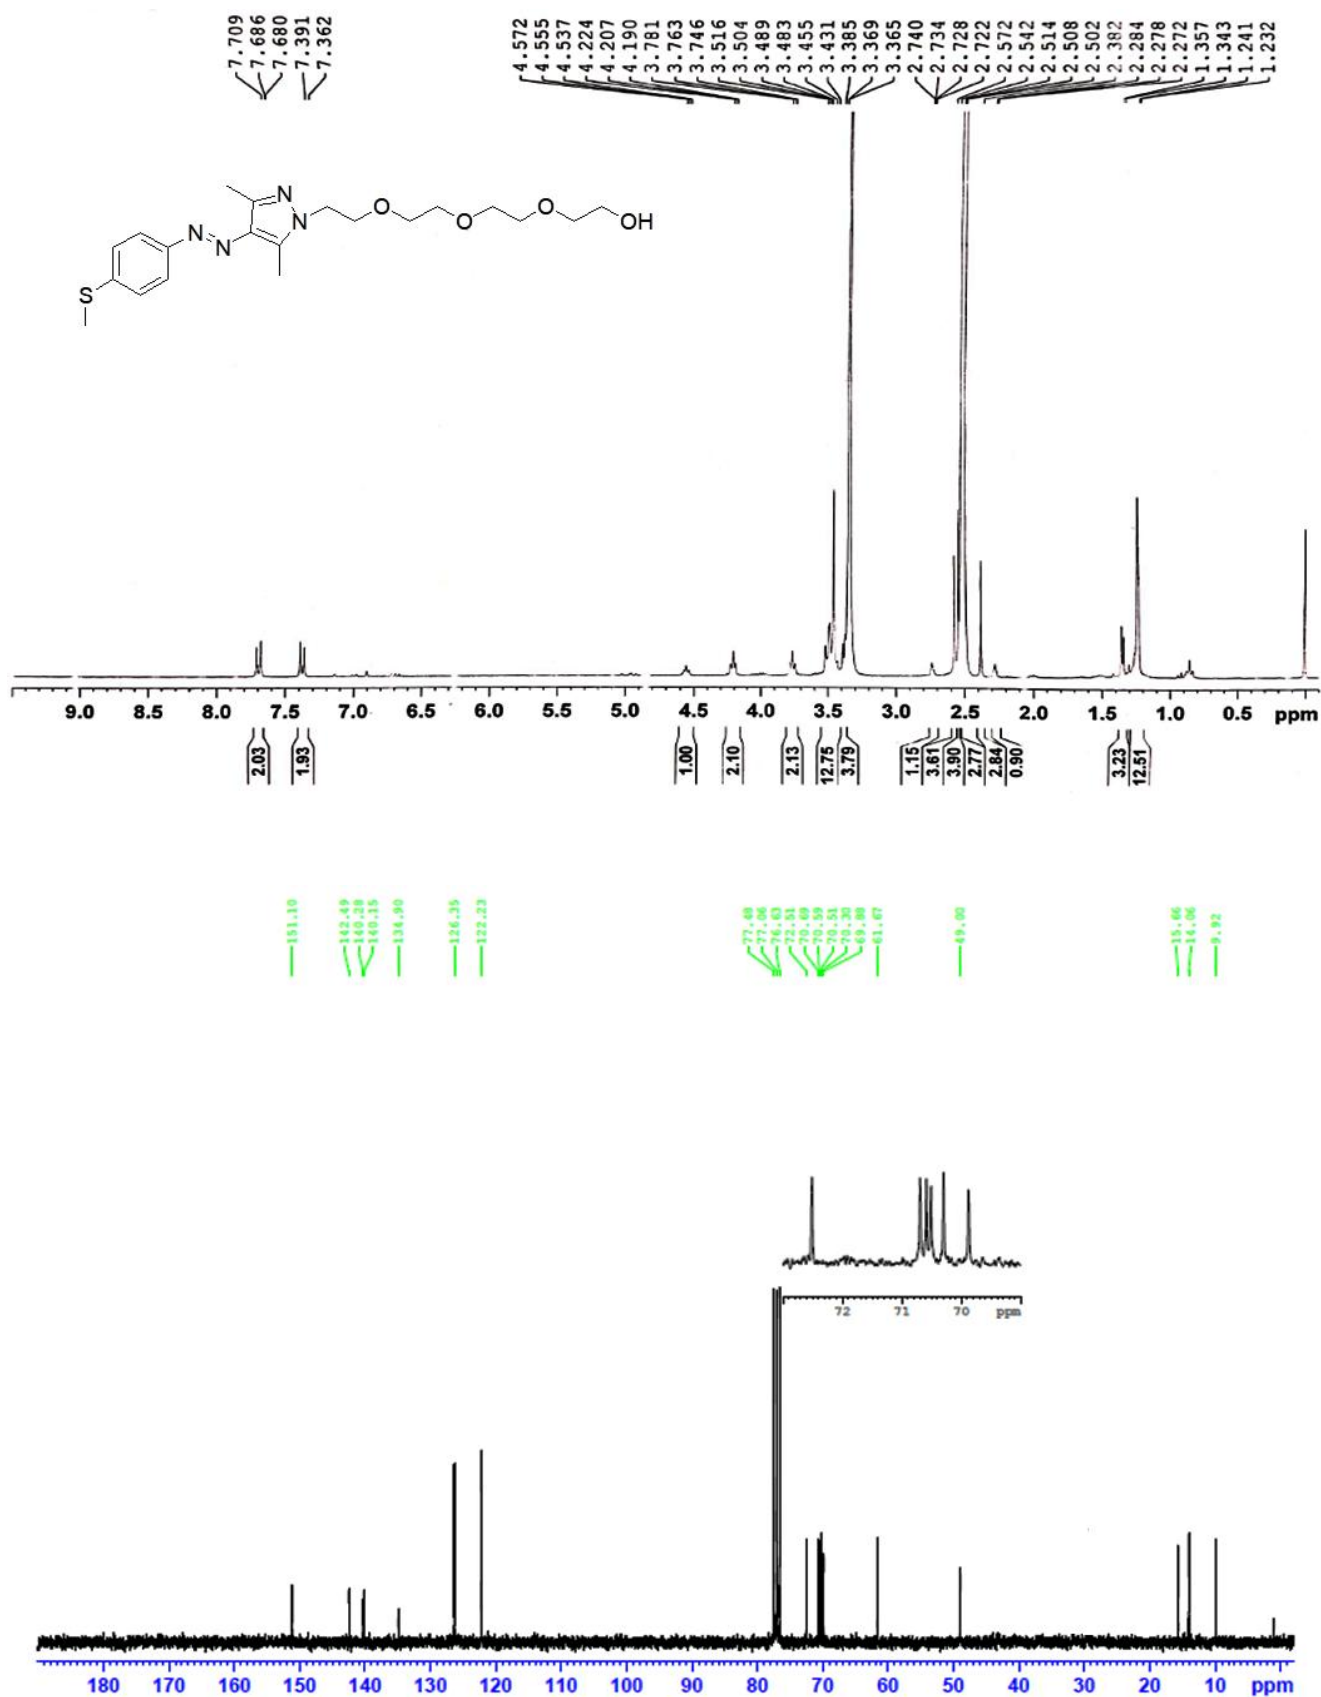

**Fig. S28.** <sup>1</sup>H and <sup>13</sup>C NMR spectra of (*E*)-2-(2-(2-(2-(3,5-dimethyl-4-((4-(methylthio)phenyl)diazenyl)-1H-pyrazol-1-yl)ethoxy)ethoxy)ethoxy)ethanol (**8**) in DMSO-*d*<sub>6</sub> and CDCl<sub>3</sub>, respectively.

## Computational Chemistry:

Geometries of *cis* and *trans* forms of **2a**, **4-6** were calculated with the nonlocal hybrid Becke three-parameter Lee-Yang-Parr (B3LYP) functional<sup>5</sup> and the 6-311++g(d,p) basis set with a DMSO solvent model (CPCM) using the Gaussian 09 suit of programs.<sup>6</sup> On the basis of the optimized geometries, singlet excited-states were calculated by time dependent DFT (TD-DFT)<sup>7</sup> method using same method and basis set, and the DMSO solvent model. Singlet excited-states having oscillator strength (f) higher than 0.01 were considered. The simulated UV-vis spectra were generated by fitting excited state energies to a Gaussian curve with full-width-at-half-maximum of the experimentally observed UV-vis spectra of compounds **4-6** (Figure S2).

Ground state free energies (sum of electronic and thermal free energies) of *trans* and *cis* isomers of **2a** and **4-6** shown in Table S1 were calculated from frequency calculations.

**Table S4. XYZ coordinates optimized molecular geometry of *trans*-4.**

|   |          |          |          |
|---|----------|----------|----------|
| C | -6.04858 | 0.34439  | -0.36968 |
| C | -3.94918 | 1.5229   | -0.06088 |
| C | -5.28711 | 1.92665  | -2.04549 |
| C | -6.24074 | 1.00639  | -1.58982 |
| H | -6.7767  | -0.35825 | -0.02176 |
| H | -5.43382 | 2.43211  | -2.9771  |
| H | -7.11557 | 0.80921  | -2.17351 |
| N | -2.74731 | 1.7938   | 0.74101  |
| N | -2.57838 | 1.21182  | 1.81366  |
| C | -1.04826 | 0.93267  | 3.78323  |
| C | -0.24467 | 2.43248  | 2.27542  |
| C | -1.37651 | 1.48271  | 2.61555  |
| N | 0.13144  | 1.63977  | 4.32997  |
| N | 0.65091  | 2.37272  | 3.21944  |
| C | -1.77217 | -0.25147 | 4.45059  |
| H | -2.80603 | -0.23851 | 4.17517  |
| H | -1.32818 | -1.16945 | 4.12641  |
| H | -1.68526 | -0.1692  | 5.51388  |
| C | -0.16131 | 3.31297  | 1.01471  |
| H | -0.67633 | 2.83235  | 0.20931  |
| H | -0.61436 | 4.26205  | 1.21191  |
| H | 0.86469  | 3.45626  | 0.74695  |
| C | -4.14133 | 2.1849   | -1.28103 |
| C | -3.73255 | 4.6024   | -2.84234 |
| H | -4.21328 | 4.14246  | -3.68035 |
| H | -4.46233 | 5.11027  | -2.24704 |
| H | -3.00443 | 5.30503  | -3.19026 |
| S | -2.93007 | 3.35378  | -1.85981 |
| C | -4.9028  | 0.60264  | 0.39479  |
| S | -4.65874 | -0.23821 | 1.94457  |
| C | -6.23956 | -0.60689 | 2.67496  |
| H | -6.77554 | 0.30367  | 2.84376  |
| H | -6.80056 | -1.23363 | 2.01361  |
| H | -6.09285 | -1.11235 | 3.60657  |
| C | 1.11472  | 0.70792  | 4.90069  |
| H | 1.95934  | 1.25718  | 5.261    |
| H | 0.66778  | 0.16941  | 5.71011  |
| H | 1.43275  | 0.01888  | 4.14638  |

**Table S5. Details of electronic transitions of *trans*-4.**

| Excited State | Energy (eV), $\lambda$ (nm) | Oscillator Strength (f) | MOs, coefficients (81 = HOMO, 82 = LUMO) |         |
|---------------|-----------------------------|-------------------------|------------------------------------------|---------|
| 1             | 2.6989 eV, 459.39 nm        | 0.0428                  | 79 -> 82                                 | 0.58287 |
|               |                             |                         | 81 -> 82                                 | 0.38829 |
| 2             | 3.0107 eV, 411.82 nm        | 0.0988                  | 79 -> 82                                 | 0.22148 |
|               |                             |                         | 80 -> 82                                 | 0.54326 |

|    |                      |        |          |          |
|----|----------------------|--------|----------|----------|
| 3  | 3.1616 eV, 392.15 nm | 0.3975 | 81 -> 82 | -0.38554 |
|    |                      |        | 79 -> 82 | -0.32471 |
|    |                      |        | 80 -> 82 | 0.44230  |
| 4  | 4.0763 eV, 304.16 nm | 0.0477 | 81 -> 82 | 0.43657  |
|    |                      |        | 77 -> 82 | 0.51322  |
|    |                      |        | 78 -> 82 | -0.47945 |
| 5  | 4.1740 eV, 297.04 nm | 0.2843 | 77 -> 82 | 0.47443  |
|    |                      |        | 78 -> 82 | 0.49790  |
| 6  | 4.5991 eV, 269.58 nm | 0.2056 | 80 -> 83 | 0.12290  |
|    |                      |        | 80 -> 88 | 0.16832  |
|    |                      |        | 81 -> 83 | 0.64594  |
| 7  | 4.8514 eV, 255.56 nm | 0.1901 | 76 -> 82 | -0.25428 |
|    |                      |        | 79 -> 83 | -0.10944 |
|    |                      |        | 80 -> 83 | 0.61714  |
|    |                      |        | 81 -> 83 | -0.10724 |
| 8  | 4.9313 eV, 251.42 nm | 0.0176 | 76 -> 82 | -0.11020 |
|    |                      |        | 80 -> 85 | 0.15168  |
|    |                      |        | 81 -> 84 | 0.60817  |
|    |                      |        | 81 -> 85 | -0.19234 |
|    |                      |        | 81 -> 86 | 0.11979  |
| 10 | 5.0192 eV, 247.02 nm | 0.0126 | 76 -> 82 | -0.21538 |
|    |                      |        | 80 -> 84 | 0.55374  |
|    |                      |        | 80 -> 86 | -0.11658 |
|    |                      |        | 81 -> 84 | 0.15400  |
|    |                      |        | 81 -> 85 | 0.22124  |
|    |                      |        | 81 -> 86 | -0.11211 |
|    |                      |        | 75 -> 82 | 0.11998  |
| 11 | 5.0864 eV, 243.75 nm | 0.0881 | 76 -> 82 | 0.48974  |
|    |                      |        | 80 -> 83 | 0.20513  |
|    |                      |        | 80 -> 84 | 0.13197  |
|    |                      |        | 81 -> 83 | -0.10837 |
|    |                      |        | 81 -> 84 | 0.15581  |
|    |                      |        | 81 -> 85 | 0.10821  |
|    |                      |        | 81 -> 88 | -0.32734 |
|    |                      |        | 75 -> 82 | 0.15062  |
| 13 | 5.2475 eV, 236.27 nm | 0.0167 | 80 -> 84 | 0.11866  |
|    |                      |        | 80 -> 86 | -0.11011 |
|    |                      |        | 81 -> 85 | 0.12479  |
|    |                      |        | 81 -> 86 | 0.60440  |
|    |                      |        | 75 -> 82 | 0.18393  |
| 15 | 5.3053 eV, 233.70 nm | 0.0498 | 79 -> 87 | 0.17343  |
|    |                      |        | 80 -> 85 | -0.22007 |
|    |                      |        | 80 -> 86 | 0.11945  |
|    |                      |        | 81 -> 87 | 0.56909  |
|    |                      |        | 74 -> 82 | 0.11953  |
| 16 | 5.3103 eV, 233.48 nm | 0.0215 | 75 -> 82 | -0.13398 |
|    |                      |        | 80 -> 84 | 0.12462  |
|    |                      |        | 80 -> 85 | -0.33538 |
|    |                      |        | 80 -> 86 | 0.35924  |
|    |                      |        | 80 -> 88 | 0.17192  |
|    |                      |        | 81 -> 85 | -0.20275 |
|    |                      |        | 81 -> 86 | 0.14874  |
|    |                      |        | 81 -> 87 | -0.20337 |
|    |                      |        | 81 -> 88 | -0.14914 |
|    |                      |        | 74 -> 82 | 0.13580  |
| 17 | 5.3379 eV, 232.27 nm | 0.0921 | 75 -> 82 | 0.27461  |
|    |                      |        | 76 -> 82 | -0.10277 |
|    |                      |        | 80 -> 85 | 0.36577  |
|    |                      |        | 80 -> 86 | 0.24677  |
|    |                      |        | 80 -> 88 | 0.36553  |
|    |                      |        | 74 -> 82 | 0.13850  |
| 18 | 5.3503 eV, 231.73 nm | 0.0154 | 75 -> 82 | 0.29977  |
|    |                      |        | 76 -> 82 | -0.16397 |

|    |                      |        |          |          |
|----|----------------------|--------|----------|----------|
|    |                      |        | 79 -> 84 | -0.19305 |
|    |                      |        | 79 -> 88 | -0.29673 |
|    |                      |        | 80 -> 84 | -0.12894 |
|    |                      |        | 80 -> 85 | -0.25214 |
|    |                      |        | 80 -> 86 | -0.19049 |
|    |                      |        | 81 -> 87 | -0.16681 |
|    |                      |        | 81 -> 88 | -0.13665 |
| 19 | 5.3837 eV, 230.29 nm | 0.1000 | 74 -> 82 | 0.10015  |
|    |                      |        | 79 -> 84 | 0.24618  |
|    |                      |        | 79 -> 88 | 0.25267  |
|    |                      |        | 80 -> 84 | -0.15786 |
|    |                      |        | 80 -> 85 | -0.10775 |
|    |                      |        | 80 -> 86 | -0.28098 |
|    |                      |        | 80 -> 88 | 0.39127  |
|    |                      |        | 81 -> 89 | 0.14336  |
| 20 | 5.4395 eV, 227.93 nm | 0.0473 | 74 -> 82 | 0.32494  |
|    |                      |        | 76 -> 82 | -0.10091 |
|    |                      |        | 78 -> 83 | -0.12231 |
|    |                      |        | 79 -> 84 | 0.40199  |
|    |                      |        | 79 -> 87 | -0.14292 |
|    |                      |        | 80 -> 88 | -0.25638 |
|    |                      |        | 81 -> 88 | -0.21021 |

**Table S6. XYZ coordinates optimized molecular geometry of *cis*-4.**

|   |          |          |          |
|---|----------|----------|----------|
| C | -6.11442 | 0.47     | -0.249   |
| C | -4.94811 | 0.70615  | 0.49119  |
| C | -3.97233 | 1.58405  | 0.00021  |
| C | -5.32916 | 1.98965  | -1.97115 |
| C | -6.30495 | 1.11176  | -1.48017 |
| H | -6.85946 | -0.20029 | 0.12587  |
| H | -5.47463 | 2.47964  | -2.91118 |
| H | -7.19545 | 0.93145  | -2.04532 |
| C | -4.16285 | 2.2258   | -1.23096 |
| C | -3.70052 | 4.59426  | -2.85136 |
| H | -4.21012 | 4.13279  | -3.67127 |
| H | -4.40306 | 5.13888  | -2.25578 |
| H | -2.95548 | 5.26456  | -3.22624 |
| S | -2.92345 | 3.34087  | -1.85458 |
| C | -5.53026 | -1.68658 | 2.03554  |
| H | -6.57685 | -1.5402  | 1.86782  |
| H | -5.12455 | -2.29129 | 1.25157  |
| H | -5.38479 | -2.17657 | 2.97557  |
| S | -4.70612 | -0.10898 | 2.05497  |
| C | -2.08777 | 0.19041  | -2.01384 |
| C | -2.77002 | -1.27717 | -0.43168 |
| C | -2.13731 | -0.05597 | -0.64492 |
| C | -1.44444 | 1.4709   | -2.57783 |
| H | -2.12366 | 1.94176  | -3.25743 |
| H | -1.22136 | 2.14159  | -1.77452 |
| H | -0.54131 | 1.21902  | -3.09341 |
| C | -2.98157 | -1.83612 | 0.98762  |
| H | -2.84096 | -1.05363 | 1.70374  |
| H | -3.97501 | -2.22414 | 1.07373  |
| H | -2.27571 | -2.61897 | 1.17152  |
| N | -1.60791 | 0.82823  | 0.40333  |
| N | -2.69068 | 1.84356  | 0.81361  |
| N | -2.69462 | -0.88368 | -2.67939 |
| N | -3.12723 | -1.8141  | -1.67638 |
| C | -2.8578  | -1.03035 | -4.13292 |
| H | -1.92791 | -0.82106 | -4.61914 |
| H | -3.16089 | -2.0314  | -4.35859 |

Table S7. Details of electronic transitions of *cis*-4.

| Excited State | Energy (eV), $\lambda$ (nm) | Oscillator Strength (f) | MOs, coefficients<br>(81 = HOMO, 82 = LUMO)                                                                                                    |
|---------------|-----------------------------|-------------------------|------------------------------------------------------------------------------------------------------------------------------------------------|
| 1             | 2.5987 eV 477.10 nm         | 0.0744                  | 77 -> 82 0.16040<br>79 -> 82 -0.12045<br>80 -> 82 0.17932<br>81 -> 82 0.64859                                                                  |
| 2             | 3.0508 eV 406.40 nm         | 0.0442                  | 80 -> 82 0.67412<br>81 -> 82 -0.19640                                                                                                          |
| 3             | 3.4360 eV 360.83 nm         | 0.0147                  | 77 -> 82 -0.19317<br>79 -> 82 0.64838<br>81 -> 82 0.14968                                                                                      |
| 4             | 4.0250 eV 308.04 nm         | 0.2384                  | 77 -> 82 0.62693<br>78 -> 82 -0.11890<br>79 -> 82 0.20528<br>81 -> 82 -0.11825<br>81 -> 84 -0.12603                                            |
| 6             | 4.3728 eV 283.53 nm         | 0.0660                  | 80 -> 84 0.29473<br>81 -> 83 0.62092                                                                                                           |
| 8             | 4.6960 eV 264.02 nm         | 0.0143                  | 76 -> 82 -0.27731<br>80 -> 83 -0.36233<br>81 -> 84 0.49901                                                                                     |
| 9             | 4.8257 eV 256.92 nm         | 0.2391                  | 76 -> 82 -0.10800<br>79 -> 83 0.13565<br>80 -> 83 -0.30356<br>80 -> 84 0.44733<br>81 -> 83 -0.17451<br>81 -> 84 -0.32778                       |
| 10            | 4.8917 eV 253.46 nm         | 0.1660                  | 75 -> 82 0.11231<br>76 -> 82 0.16449<br>79 -> 83 0.24880<br>80 -> 83 0.32568<br>80 -> 84 0.34902<br>81 -> 83 -0.21307<br>81 -> 84 0.28315      |
| 11            | 5.0455 eV 245.73 nm         | 0.0174                  | 80 -> 85 -0.11063<br>80 -> 86 0.12481<br>81 -> 85 0.61801<br>81 -> 86 -0.18394                                                                 |
| 12            | 5.0666 eV 244.71 nm         | 0.1453                  | 79 -> 83 0.51954<br>80 -> 83 -0.12168<br>80 -> 84 -0.17464<br>80 -> 85 -0.26255<br>80 -> 86 -0.14296<br>81 -> 85 -0.17214<br>81 -> 86 -0.16828 |
| 13            | 5.1583 eV 240.36 nm         | 0.1408                  | 75 -> 82 -0.12637<br>79 -> 83 0.31785<br>80 -> 84 -0.13403<br>80 -> 85 0.39136<br>81 -> 85 0.15271<br>81 -> 86 0.35086<br>81 -> 87 -0.14989    |
| 14            | 5.1866 eV 239.05 nm         | 0.0193                  | 80 -> 85 -0.26275<br>80 -> 86 0.14009<br>81 -> 86 0.42474<br>81 -> 87 0.41790<br>81 -> 88 0.13697                                              |
| 15            | 5.2343 eV 236.87 nm         | 0.0606                  | 75 -> 82 0.11688<br>79 -> 83 0.14809<br>79 -> 84 0.10989<br>80 -> 85 0.29830<br>80 -> 86 0.36175<br>81 -> 85 -0.15745                          |



|    |                     |        |  |          |          |
|----|---------------------|--------|--|----------|----------|
|    |                     |        |  | 81 -> 86 | -0.26566 |
|    |                     |        |  | 81 -> 87 | 0.27660  |
|    |                     |        |  | 81 -> 89 | -0.10914 |
| 16 | 5.2642 eV 235.52 nm | 0.0294 |  | 75 -> 82 | 0.63233  |
|    |                     |        |  | 79 -> 84 | -0.14715 |
|    |                     |        |  | 80 -> 86 | -0.14163 |
|    |                     |        |  | 81 -> 85 | 0.10228  |
| 18 | 5.3118 eV 233.41 nm | 0.0123 |  | 79 -> 84 | 0.60645  |
|    |                     |        |  | 80 -> 86 | -0.24507 |
|    |                     |        |  | 81 -> 88 | 0.13993  |
| 19 | 5.3621 eV 231.22 nm | 0.0146 |  | 74 -> 82 | 0.57540  |
|    |                     |        |  | 79 -> 84 | -0.15675 |
|    |                     |        |  | 80 -> 88 | 0.11158  |
|    |                     |        |  | 81 -> 88 | 0.15531  |
|    |                     |        |  | 81 -> 89 | -0.26639 |

**Table S8. XYZ coordinates optimized molecular geometry of *trans*-5 (conf-1).**

|   |          |          |          |
|---|----------|----------|----------|
| C | -6.34194 | 1.10883  | 0.02373  |
| C | -5.06585 | 1.17135  | 0.59956  |
| C | -4.06325 | 1.94472  | -0.00094 |
| C | -5.61285 | 2.59307  | -1.75313 |
| C | -6.61545 | 1.8197   | -1.15262 |
| H | -7.10745 | 0.51834  | 0.48223  |
| H | -5.82168 | 3.13584  | -2.65129 |
| H | -7.58978 | 1.77197  | -1.59228 |
| N | -2.72469 | 2.0103   | 0.60308  |
| N | -2.48424 | 1.38537  | 1.63723  |
| C | -0.67844 | 0.75991  | 3.50735  |
| C | -1.14568 | 1.45094  | 2.24126  |
| N | 1.095    | 1.76122  | 2.58901  |
| C | -1.53417 | -0.16632 | 4.39133  |
| H | -2.56113 | 0.12688  | 4.32576  |
| H | -1.42958 | -1.17676 | 4.05521  |
| H | -1.20638 | -0.09263 | 5.40721  |
| C | -0.12274 | 3.1768   | 0.65813  |
| H | -0.88204 | 2.91089  | -0.04731 |
| H | -0.3329  | 4.14594  | 1.06001  |
| H | 0.82884  | 3.19216  | 0.16909  |
| C | -4.33675 | 2.65559  | -1.17729 |
| C | -0.09701 | 2.14258  | 1.79889  |
| N | 0.56239  | 1.08759  | 3.73046  |
| C | 1.90991  | 2.92941  | 2.95253  |
| H | 2.26227  | 3.40912  | 2.06335  |
| H | 1.31563  | 3.61706  | 3.51722  |
| H | 2.74499  | 2.61237  | 3.54161  |
| S | -3.0633  | 3.6379   | -1.94003 |
| C | -3.32842 | 3.69066  | -3.69939 |
| H | -4.28454 | 4.12566  | -3.90312 |
| H | -2.56292 | 4.28115  | -4.15789 |
| H | -3.29718 | 2.69687  | -4.09475 |
| H | -4.85702 | 0.62858  | 1.49773  |

**Table S9. Details of electronic transitions of *trans*-5 (conf-1).**

| Excited State | Energy (eV), $\lambda$ (nm) | Oscillator Strength (f) | MOs, coefficients (69 = HOMO, 70 = LUMO) |          |
|---------------|-----------------------------|-------------------------|------------------------------------------|----------|
| 2             | 2.8888 eV 429.20 nm         | 0.2981                  | 67 -> 70                                 | 0.12959  |
|               |                             |                         | 69 -> 70                                 | 0.68981  |
| 3             | 3.5610 eV 348.18 nm         | 0.5080                  | 67 -> 70                                 | 0.65686  |
|               |                             |                         | 68 -> 70                                 | -0.19980 |
|               |                             |                         | 69 -> 70                                 | -0.14476 |

|    |           |           |        |          |          |
|----|-----------|-----------|--------|----------|----------|
| 4  | 3.9823 eV | 311.33 nm | 0.0210 | 66 -> 70 | 0.70362  |
| 5  | 4.5971 eV | 269.70 nm | 0.0785 | 64 -> 70 | 0.15086  |
|    |           |           |        | 65 -> 70 | 0.48920  |
|    |           |           |        | 69 -> 71 | 0.45103  |
|    |           |           |        | 69 -> 74 | -0.10649 |
| 6  | 4.8434 eV | 255.99 nm | 0.1710 | 65 -> 70 | -0.46837 |
|    |           |           |        | 69 -> 71 | 0.49447  |
| 10 | 5.0996 eV | 243.13 nm | 0.0101 | 63 -> 70 | -0.22915 |
|    |           |           |        | 64 -> 70 | 0.56467  |
|    |           |           |        | 67 -> 71 | -0.27048 |
|    |           |           |        | 69 -> 71 | -0.11525 |
|    |           |           |        | 69 -> 74 | 0.13794  |
| 12 | 5.2207 eV | 237.48 nm | 0.1608 | 67 -> 71 | 0.34447  |
|    |           |           |        | 68 -> 71 | -0.10250 |
|    |           |           |        | 69 -> 74 | 0.54689  |
|    |           |           |        | 69 -> 77 | -0.15155 |
| 15 | 5.4826 eV | 226.14 nm | 0.1372 | 64 -> 70 | 0.25974  |
|    |           |           |        | 67 -> 71 | 0.42091  |
|    |           |           |        | 68 -> 71 | -0.12603 |
|    |           |           |        | 69 -> 74 | -0.37133 |
|    |           |           |        | 69 -> 77 | -0.25746 |
| 17 | 5.5993 eV | 221.43 nm | 0.0107 | 67 -> 72 | -0.27285 |
|    |           |           |        | 69 -> 75 | -0.10500 |
|    |           |           |        | 69 -> 76 | 0.46097  |
|    |           |           |        | 69 -> 78 | -0.33931 |
|    |           |           |        | 69 -> 80 | 0.15980  |
|    |           |           |        | 69 -> 86 | -0.10679 |
| 19 | 5.6529 eV | 219.33 nm | 0.0221 | 64 -> 70 | 0.12910  |
|    |           |           |        | 65 -> 71 | 0.15934  |
|    |           |           |        | 67 -> 71 | 0.23245  |
|    |           |           |        | 67 -> 74 | -0.17062 |
|    |           |           |        | 68 -> 72 | -0.11417 |
|    |           |           |        | 69 -> 77 | 0.56583  |

**Table S10. XYZ coordinates optimized molecular geometry of *trans*-5 (conf-2).**

|   |          |          |          |
|---|----------|----------|----------|
| C | -6.29841 | 1.04378  | -0.01968 |
| C | -5.03314 | 1.12243  | 0.57767  |
| C | -4.00132 | 1.82722  | -0.05679 |
| C | -5.50004 | 2.37472  | -1.88596 |
| C | -6.53186 | 1.66992  | -1.2515  |
| H | -7.08622 | 0.50566  | 0.46474  |
| H | -5.67829 | 2.85279  | -2.82648 |
| H | -7.49792 | 1.60987  | -1.70759 |
| N | -2.67411 | 1.90972  | 0.5698   |
| N | -2.46888 | 1.35927  | 1.65271  |
| C | -0.71594 | 0.83805  | 3.60335  |
| C | -1.14168 | 1.44177  | 2.27931  |
| N | 1.09796  | 1.72996  | 2.65188  |
| C | -1.61017 | -0.00095 | 4.53505  |
| H | -2.62868 | 0.30809  | 4.42532  |
| H | -1.52172 | -1.03575 | 4.27763  |
| H | -1.30142 | 0.14188  | 5.54953  |
| C | -0.04805 | 3.02194  | 0.59458  |
| H | -0.79874 | 2.71988  | -0.10551 |
| H | -0.24428 | 4.02273  | 0.91832  |
| H | 0.91334  | 2.98047  | 0.1267   |
| C | -4.23477 | 2.45336  | -1.28861 |
| H | -3.44696 | 2.99149  | -1.77304 |
| C | -0.06886 | 2.07597  | 1.80961  |
| N | 0.52723  | 1.15532  | 3.82849  |
| C | 1.93161  | 2.9047   | 2.94496  |
| H | 2.31268  | 3.30876  | 2.0304   |
| H | 1.34177  | 3.64519  | 3.44363  |

|   |          |          |         |
|---|----------|----------|---------|
| H | 2.7472   | 2.61525  | 3.5742  |
| C | -5.78085 | -1.1072  | 2.2861  |
| H | -6.80671 | -0.80896 | 2.22635 |
| H | -5.56095 | -1.78957 | 1.4918  |
| H | -5.6026  | -1.58527 | 3.22662 |
| S | -4.73661 | 0.32713  | 2.14227 |

**Table S11. Details of electronic transitions of *trans*-5(conf-2).**

| Excited State | Energy (eV), $\lambda$ (nm) | Oscillator Strength (f) | MOs, coefficients<br>(69 = HOMO, 70 = LUMO) |          |
|---------------|-----------------------------|-------------------------|---------------------------------------------|----------|
|               |                             |                         |                                             |          |
| 1             | 2.7449 eV 451.68 nm         | 0.0162                  | 67 -> 70                                    | 0.27332  |
|               |                             |                         | 68 -> 70                                    | 0.61634  |
|               |                             |                         | 69 -> 70                                    | 0.19942  |
| 2             | 3.1465 eV 394.04 nm         | 0.3770                  | 68 -> 70                                    | -0.23351 |
|               |                             |                         | 69 -> 70                                    | 0.66229  |
|               |                             |                         | 69 -> 70                                    | -0.14476 |
| 3             | 3.7103 eV 334.17 nm         | 0.4620                  | 67 -> 70                                    | 0.63579  |
|               |                             |                         | 68 -> 70                                    | -0.23833 |
|               |                             |                         | 69 -> 70                                    | -0.13528 |
|               |                             |                         | 69 -> 71                                    | -0.12465 |
| 4             | 4.0813 eV 303.79 nm         | 0.0236                  | 66 -> 70                                    | 0.70260  |
|               |                             |                         | 65 -> 70                                    | 0.24001  |
| 5             | 4.6586 eV 266.14 nm         | 0.1824                  | 67 -> 70                                    | 0.10970  |
|               |                             |                         | 69 -> 71                                    | 0.61830  |
|               |                             |                         | 65 -> 70                                    | -0.19217 |
| 6             | 4.8736 eV 254.40 nm         | 0.0140                  | 67 -> 71                                    | 0.20150  |
|               |                             |                         | 68 -> 71                                    | 0.64609  |
|               |                             |                         | 65 -> 70                                    | 0.34546  |
|               |                             |                         | 68 -> 71                                    | 0.11309  |
| 7             | 4.9815 eV 248.89 nm         | 0.0364                  | 69 -> 71                                    | -0.17647 |
|               |                             |                         | 69 -> 72                                    | 0.5200   |
|               |                             |                         | 69 -> 74                                    | -0.13983 |
|               |                             |                         | 65 -> 70                                    | 0.43991  |
|               |                             |                         | 68 -> 71                                    | 0.13231  |
| 8             | 5.0223 eV 246.87 nm         | 0.0562                  | 68 -> 74                                    | -0.11141 |
|               |                             |                         | 69 -> 71                                    | -0.19679 |
|               |                             |                         | 69 -> 72                                    | -0.41085 |
|               |                             |                         | 69 -> 73                                    | 0.13815  |
|               |                             |                         | 69 -> 74                                    | -0.11244 |
| 12            | 5.2698 eV 235.27 nm         | 0.0389                  | 64 -> 70                                    | -0.25242 |
|               |                             |                         | 65 -> 70                                    | 0.12502  |
|               |                             |                         | 67 -> 71                                    | 0.25941  |
|               |                             |                         | 67 -> 72                                    | -0.11283 |
|               |                             |                         | 69 -> 73                                    | 0.14048  |
|               |                             |                         | 69 -> 74                                    | 0.51206  |
|               |                             |                         | 64 -> 70                                    | 0.11030  |
| 13            | 5.3440 eV 232.01 nm         | 0.0382                  | 67 -> 71                                    | -0.11957 |
|               |                             |                         | 67 -> 74                                    | 0.18203  |
|               |                             |                         | 68 -> 72                                    | -0.23881 |
|               |                             |                         | 68 -> 73                                    | -0.21464 |
|               |                             |                         | 68 -> 74                                    | 0.49388  |
|               |                             |                         | 68 -> 76                                    | 0.16393  |
|               |                             |                         | 69 -> 73                                    | 0.11119  |
|               |                             |                         | 67 -> 74                                    | 0.12739  |
| 15            | 5.4619 eV 227.00 nm         | 0.0196                  | 68 -> 72                                    | 0.60836  |
|               |                             |                         | 68 -> 73                                    | -0.13267 |
|               |                             |                         | 68 -> 74                                    | 0.18786  |
|               |                             |                         | 69 -> 73                                    | -0.15383 |
|               |                             |                         | 67 -> 74                                    | -0.17062 |
|               |                             |                         | 68 -> 72                                    | -0.11417 |
|               |                             |                         | 69 -> 77                                    | 0.56583  |

|    |                     |        |          |          |
|----|---------------------|--------|----------|----------|
| 16 | 5.4800 eV 226.25 nm | 0.0173 | 64 -> 70 | -0.25336 |
|    |                     |        | 65 -> 71 | 0.10686  |
|    |                     |        | 67 -> 71 | 0.39300  |
|    |                     |        | 68 -> 71 | -0.13932 |
|    |                     |        | 68 -> 74 | 0.15952  |
|    |                     |        | 69 -> 74 | -0.37821 |
|    |                     |        | 69 -> 76 | 0.18345  |
| 17 | 5.5881 eV 221.87 nm | 0.1043 | 67 -> 71 | -0.16545 |
|    |                     |        | 67 -> 76 | 0.10438  |
|    |                     |        | 68 -> 76 | 0.14095  |
|    |                     |        | 69 -> 76 | 0.60137  |

**Table S12. XYZ coordinates optimized molecular geometry of *cis*-5 (conformer-1)**

|   |          |          |          |
|---|----------|----------|----------|
| C | -6.11442 | 0.47     | -0.249   |
| C | -4.94811 | 0.70615  | 0.49119  |
| C | -3.97233 | 1.58405  | 0.00021  |
| C | -5.32916 | 1.98965  | -1.97115 |
| C | -6.30495 | 1.11176  | -1.48017 |
| H | -6.85946 | -0.20029 | 0.12587  |
| H | -5.47463 | 2.47964  | -2.91118 |
| H | -7.19545 | 0.93145  | -2.04532 |
| C | -4.16285 | 2.2258   | -1.23096 |
| C | -5.53026 | -1.68658 | 2.03554  |
| H | -6.57685 | -1.5402  | 1.86782  |
| H | -5.12455 | -2.29129 | 1.25157  |
| H | -5.38479 | -2.17657 | 2.97557  |
| S | -4.70612 | -0.10898 | 2.05497  |
| C | -2.08777 | 0.19041  | -2.01384 |
| C | -2.77002 | -1.27717 | -0.43168 |
| C | -2.13731 | -0.05597 | -0.64492 |
| C | -1.44444 | 1.4709   | -2.57783 |
| H | -2.12366 | 1.94176  | -3.25743 |
| H | -1.22136 | 2.14159  | -1.77452 |
| H | -0.54131 | 1.21902  | -3.09341 |
| C | -2.98157 | -1.83612 | 0.98762  |
| H | -2.84096 | -1.05363 | 1.70374  |
| H | -3.97501 | -2.22414 | 1.07373  |
| H | -2.27571 | -2.61897 | 1.17152  |
| N | -1.60791 | 0.82823  | 0.40333  |
| N | -2.69068 | 1.84356  | 0.81361  |
| N | -2.69462 | -0.88368 | -2.67939 |
| N | -3.12723 | -1.8141  | -1.67638 |
| C | -2.8578  | -1.03035 | -4.13292 |
| H | -1.92791 | -0.82106 | -4.61914 |
| H | -3.16089 | -2.0314  | -4.35859 |
| H | -3.60337 | -0.34535 | -4.47905 |
| H | -3.41782 | 2.8961   | -1.60583 |

**Table S13. Details of electronic transitions of *cis*-5 (conformer-1)**

| Excited State | Energy (eV), $\lambda$ (nm) | Oscillator Strength (f) | MOs, coefficients (69 = HOMO, 70 = LUMO) |          |
|---------------|-----------------------------|-------------------------|------------------------------------------|----------|
| 1             | 2.5689 eV 482.64 nm         | 0.0969                  | 66 -> 70                                 | 0.16505  |
|               |                             |                         | 68 -> 70                                 | -0.22645 |
|               |                             |                         | 69 -> 70                                 | 0.64305  |
| 2             | 3.1843 eV 389.36 nm         | 0.0541                  | 68 -> 70                                 | 0.64688  |
|               |                             |                         | 69 -> 70                                 | 0.25445  |
| 3             | 3.9768 eV 311.77 nm         | 0.1370                  | 66 -> 70                                 | -0.38822 |
|               |                             |                         | 67 -> 70                                 | 0.55622  |

|    |                     |        |          |          |
|----|---------------------|--------|----------|----------|
| 4  | 4.0401 eV 306.89 nm | 0.1598 | 68 -> 70 | -0.11339 |
|    |                     |        | 66 -> 70 | 0.53050  |
|    |                     |        | 67 -> 70 | 0.42510  |
| 5  | 4.2730 eV 290.16 nm | 0.0140 | 68 -> 70 | 0.10087  |
|    |                     |        | 65 -> 70 | 0.57778  |
|    |                     |        | 69 -> 71 | 0.35616  |
| 6  | 4.4962 eV 275.75 nm | 0.1066 | 69 -> 72 | -0.13271 |
|    |                     |        | 65 -> 70 | -0.33726 |
|    |                     |        | 68 -> 71 | -0.12184 |
|    |                     |        | 68 -> 72 | -0.14259 |
|    |                     |        | 69 -> 71 | 0.56717  |
| 7  | 4.8229 eV 257.07 nm | 0.0626 | 68 -> 71 | 0.27538  |
|    |                     |        | 69 -> 72 | 0.61069  |
| 8  | 4.9549 eV 250.23 nm | 0.0846 | 65 -> 71 | 0.10116  |
|    |                     |        | 68 -> 71 | 0.57197  |
|    |                     |        | 68 -> 72 | -0.21906 |
|    |                     |        | 69 -> 72 | -0.25020 |
|    |                     |        | 69 -> 73 | -0.11304 |
| 9  | 5.0042 eV 247.76 nm | 0.0226 | 68 -> 71 | 0.10127  |
|    |                     |        | 68 -> 74 | -0.11373 |
|    |                     |        | 69 -> 73 | 0.66325  |
|    |                     |        | 69 -> 74 | -0.11146 |
| 10 | 5.1014 eV 243.04 nm | 0.0333 | 64 -> 70 | -0.17309 |
|    |                     |        | 68 -> 72 | -0.28587 |
|    |                     |        | 68 -> 73 | -0.14956 |
|    |                     |        | 69 -> 73 | 0.13346  |
|    |                     |        | 69 -> 74 | 0.51644  |
|    |                     |        | 69 -> 76 | -0.12402 |
| 11 | 5.1598 eV 240.29 nm | 0.0511 | 64 -> 70 | 0.64306  |
|    |                     |        | 68 -> 71 | -0.11345 |
|    |                     |        | 68 -> 72 | -0.14369 |
|    |                     |        | 69 -> 74 | 0.12604  |
|    |                     |        | 69 -> 75 | 0.11569  |
| 12 | 5.2083 eV 238.05 nm | 0.0610 | 68 -> 71 | 0.13349  |
|    |                     |        | 68 -> 72 | 0.28998  |
|    |                     |        | 68 -> 73 | -0.10288 |
|    |                     |        | 69 -> 74 | 0.23219  |
|    |                     |        | 69 -> 75 | 0.53676  |
| 13 | 5.2615 eV 235.65 nm | 0.1102 | 64 -> 70 | 0.12080  |
|    |                     |        | 65 -> 71 | -0.13678 |
|    |                     |        | 68 -> 72 | 0.43490  |
|    |                     |        | 68 -> 73 | -0.10197 |
|    |                     |        | 69 -> 71 | 0.11193  |
|    |                     |        | 69 -> 74 | 0.25290  |
|    |                     |        | 69 -> 75 | -0.38541 |
| 14 | 5.4156 eV 228.94 nm | 0.0209 | 63 -> 70 | 0.44072  |
|    |                     |        | 68 -> 72 | -0.12852 |
|    |                     |        | 68 -> 73 | -0.13465 |
|    |                     |        | 69 -> 76 | 0.45521  |
|    |                     |        | 69 -> 78 | 0.12071  |
| 16 | 5.4574 eV 227.19 nm | 0.0212 | 63 -> 70 | 0.15061  |
|    |                     |        | 68 -> 73 | 0.58526  |
|    |                     |        | 68 -> 74 | -0.24682 |
|    |                     |        | 69 -> 74 | 0.21216  |
| 17 | 5.5199 eV 224.61 nm | 0.0120 | 68 -> 74 | 0.20869  |
|    |                     |        | 69 -> 77 | 0.56979  |
|    |                     |        | 69 -> 78 | 0.28630  |
| 18 | 5.5621 eV 222.91 nm | 0.0130 | 68 -> 73 | 0.22646  |
|    |                     |        | 68 -> 74 | 0.48414  |
|    |                     |        | 68 -> 75 | -0.20618 |
|    |                     |        | 68 -> 76 | -0.15807 |
|    |                     |        | 69 -> 73 | 0.11007  |
|    |                     |        | 69 -> 76 | 0.25452  |
|    |                     |        | 69 -> 77 | -0.15232 |
|    |                     |        | 69 -> 78 | -0.14395 |
| 19 | 5.6292 eV 220.25 nm | 0.0142 | 68 -> 74 | 0.10019  |
|    |                     |        | 69 -> 77 | -0.34955 |
|    |                     |        | 69 -> 78 | 0.53498  |

|    |                     |        |          |          |
|----|---------------------|--------|----------|----------|
| 20 | 5.6334 eV 220.09 nm | 0.0790 | 69 -> 80 | 0.10536  |
|    |                     |        | 66 -> 71 | 0.61768  |
|    |                     |        | 67 -> 71 | -0.26383 |

**Table S14. XYZ coordinates optimized molecular geometry of *cis*-5 (conformer-2)**

|   |          |          |          |
|---|----------|----------|----------|
| C | -6.11442 | 0.47     | -0.249   |
| C | -4.94811 | 0.70615  | 0.49119  |
| C | -3.97233 | 1.58405  | 0.00021  |
| C | -5.32916 | 1.98965  | -1.97115 |
| C | -6.30495 | 1.11176  | -1.48017 |
| H | -6.85946 | -0.20029 | 0.12587  |
| H | -5.47463 | 2.47964  | -2.91118 |
| H | -7.19545 | 0.93145  | -2.04532 |
| C | -4.16285 | 2.2258   | -1.23096 |
| C | -5.53026 | -1.68658 | 2.03554  |
| H | -6.57685 | -1.5402  | 1.86782  |
| H | -5.12455 | -2.29129 | 1.25157  |
| H | -5.38479 | -2.17657 | 2.97557  |
| S | -4.70612 | -0.10898 | 2.05497  |
| C | -2.08777 | 0.19041  | -2.01384 |
| C | -2.13731 | -0.05597 | -0.64492 |
| C | -1.44444 | 1.4709   | -2.57783 |
| H | -2.12366 | 1.94176  | -3.25743 |
| H | -1.22136 | 2.14159  | -1.77452 |
| H | -0.54131 | 1.21902  | -3.09341 |
| C | -2.98157 | -1.83612 | 0.98762  |
| H | -2.84096 | -1.05363 | 1.70374  |
| H | -3.97501 | -2.22414 | 1.07373  |
| H | -2.27571 | -2.61897 | 1.17152  |
| N | -1.60791 | 0.82823  | 0.40333  |
| N | -2.69068 | 1.84356  | 0.81361  |
| N | -3.12723 | -1.8141  | -1.67638 |
| H | -3.41782 | 2.8961   | -1.60583 |
| C | -2.77002 | -1.27717 | -0.43168 |
| N | -2.69462 | -0.88368 | -2.67939 |
| C | -4.27883 | -2.657   | -2.02888 |
| H | -4.08835 | -3.15024 | -2.95911 |
| H | -4.43368 | -3.38781 | -1.26283 |
| H | -5.15269 | -2.04648 | -2.12128 |

**Table S15. Details of electronic transitions of *cis*-5 (conformer-2).**

| Excited State | Energy (eV), $\lambda$ (nm) | Oscillator Strength (f) | MOs, coefficients<br>(69 = HOMO, 70 = LUMO)                                                       |
|---------------|-----------------------------|-------------------------|---------------------------------------------------------------------------------------------------|
| 1             | 2.5542 eV 485.41 nm         | 0.0912                  | 66 -> 70 -0.16020<br>68 -> 70 0.21504<br>69 -> 70 0.64714                                         |
| 2             | 3.1590 eV 392.48 nm         | 0.0447                  | 68 -> 70 0.64999<br>69 -> 70 -0.24438                                                             |
| 3             | 3.9108 eV 317.03 nm         | 0.1283                  | 65 -> 70 0.10573<br>66 -> 70 0.55452<br>67 -> 70 -0.36925<br>68 -> 70 0.13636<br>69 -> 70 0.11575 |
| 4             | 3.9579 eV 313.25 nm         | 0.0816                  | 66 -> 70 0.35144<br>67 -> 70 0.59812                                                              |
| 5             | 4.2473 eV 291.92 nm         | 0.0269                  | 65 -> 70 0.62200<br>69 -> 71 0.26773<br>69 -> 72 0.13401                                          |
| 6             | 4.5028 eV 275.35 nm         | 0.0833                  | 65 -> 70 -0.24876<br>68 -> 71 0.11685<br>68 -> 72 -0.16127                                        |



|    |                     |        |          |          |
|----|---------------------|--------|----------|----------|
| 7  | 4.8129 eV 257.61 nm | 0.0907 | 69 -> 71 | 0.60767  |
|    |                     |        | 68 -> 71 | 0.21303  |
| 8  | 4.9754 eV 249.20 nm | 0.0524 | 69 -> 72 | 0.62443  |
|    |                     |        | 64 -> 70 | -0.13152 |
|    |                     |        | 65 -> 71 | -0.10163 |
|    |                     |        | 68 -> 71 | 0.55275  |
|    |                     |        | 68 -> 72 | 0.26059  |
|    |                     |        | 69 -> 72 | -0.17088 |
| 9  | 4.9978 eV 248.08 nm | 0.0298 | 69 -> 73 | 0.22206  |
|    |                     |        | 68 -> 71 | -0.17778 |
|    |                     |        | 68 -> 74 | -0.10598 |
|    |                     |        | 69 -> 72 | 0.13496  |
|    |                     |        | 69 -> 73 | 0.63559  |
| 10 | 5.1129 eV 242.49 nm | 0.0441 | 64 -> 70 | 0.58173  |
|    |                     |        | 68 -> 73 | -0.12772 |
|    |                     |        | 69 -> 74 | 0.28795  |
| 11 | 5.1312 eV 241.63 nm | 0.0854 | 63 -> 70 | -0.11029 |
|    |                     |        | 64 -> 70 | -0.30679 |
|    |                     |        | 68 -> 71 | -0.20858 |
|    |                     |        | 68 -> 72 | 0.35015  |
|    |                     |        | 68 -> 73 | -0.15545 |
| 12 | 5.2238 eV 237.34 nm | 0.0959 | 69 -> 74 | 0.39293  |
|    |                     |        | 63 -> 70 | -0.24707 |
|    |                     |        | 64 -> 70 | 0.13709  |
|    |                     |        | 65 -> 71 | -0.11517 |
|    |                     |        | 68 -> 71 | -0.12612 |
|    |                     |        | 68 -> 72 | 0.41672  |
|    |                     |        | 68 -> 73 | 0.13474  |
|    |                     |        | 69 -> 71 | 0.13153  |
|    |                     |        | 69 -> 74 | -0.38712 |
|    |                     |        | 69 -> 75 | 0.11067  |
| 13 | 5.2931 eV 234.24 nm | 0.0361 | 69 -> 75 | 0.66443  |
| 14 | 5.3248 eV 232.84 nm | 0.0943 | 63 -> 70 | 0.61450  |
|    |                     |        | 68 -> 71 | -0.11425 |
|    |                     |        | 68 -> 72 | 0.22707  |
| 15 | 5.4455 eV 227.68 nm | 0.0205 | 68 -> 73 | 0.52996  |
|    |                     |        | 68 -> 74 | 0.17873  |
|    |                     |        | 69 -> 74 | 0.26725  |
|    |                     |        | 69 -> 76 | -0.10226 |
|    |                     |        | 69 -> 77 | 0.24583  |
|    |                     |        | 69 -> 78 | 0.10231  |
| 17 | 5.4897 eV 225.85 nm | 0.0127 | 68 -> 74 | 0.19862  |
|    |                     |        | 69 -> 76 | 0.60800  |
|    |                     |        | 69 -> 77 | 0.21736  |
|    |                     |        | 69 -> 78 | -0.10945 |
| 18 | 5.6146 eV 220.83 nm | 0.0131 | 68 -> 74 | 0.51264  |
|    |                     |        | 68 -> 78 | 0.10114  |
|    |                     |        | 69 -> 76 | -0.15853 |
|    |                     |        | 69 -> 77 | -0.23613 |
|    |                     |        | 69 -> 78 | -0.28791 |
| 19 | 5.6923 eV 217.81 nm | 0.0399 | 66 -> 71 | 0.63928  |
|    |                     |        | 67 -> 71 | -0.23506 |
| 20 | 5.6334 eV 220.09 nm | 0.0120 | 68 -> 74 | 0.27035  |
|    |                     |        | 68 -> 75 | 0.34082  |
|    |                     |        | 69 -> 77 | -0.10668 |
|    |                     |        | 69 -> 78 | 0.46393  |
|    |                     |        | 69 -> 80 | -0.11690 |

**Table S16. XYZ coordinates optimized molecular geometry of *trans*-6.**

|   |          |         |          |
|---|----------|---------|----------|
| C | -6.21894 | 0.69909 | -0.24854 |
| C | -5.02005 | 0.84572 | 0.46215  |
| C | -4.04586 | 1.7481  | 0.01428  |
| C | -5.46946 | 2.35721 | -1.85498 |
| C | -6.44364 | 1.45483 | -1.4071  |
| H | -6.96275 | 0.0101  | 0.09343  |
| H | -5.64103 | 2.93423 | -2.73958 |

|   |          |          |          |
|---|----------|----------|----------|
| N | -2.78829 | 1.90192  | 0.75976  |
| N | -2.59075 | 1.23754  | 1.77828  |
| C | -0.96976 | 0.74421  | 3.62961  |
| C | -0.17327 | 2.30618  | 2.18236  |
| C | -1.33317 | 1.39136  | 2.52377  |
| N | 0.27461  | 1.35184  | 4.15205  |
| N | 0.76931  | 2.13552  | 3.0651   |
| C | -1.71708 | -0.44741 | 4.25664  |
| H | -2.76259 | -0.36413 | 4.0448   |
| H | -1.34135 | -1.3607  | 3.84478  |
| H | -1.56653 | -0.44534 | 5.31599  |
| C | -0.11394 | 3.26893  | 0.98187  |
| H | -0.69806 | 2.87269  | 0.17769  |
| H | -0.50416 | 4.22269  | 1.26993  |
| H | 0.90162  | 3.38034  | 0.66387  |
| C | -4.27057 | 2.50385  | -1.14429 |
| H | -3.52676 | 3.19283  | -1.48626 |
| C | 1.23738  | 0.33459  | 4.59835  |
| H | 2.12885  | 0.8147   | 4.94432  |
| H | 0.80847  | -0.23752 | 5.39436  |
| H | 1.47561  | -0.31384 | 3.78124  |
| C | -7.87541 | -0.15086 | -2.70943 |
| H | -8.15335 | -0.79941 | -1.90505 |
| H | -8.61974 | -0.19523 | -3.47684 |
| H | -6.93257 | -0.46162 | -3.10866 |
| S | -7.76111 | 1.29369  | -2.18808 |
| H | -4.84848 | 0.2687   | 1.34675  |

**Table S17. Details of electronic transitions of *trans*-6.**

| Excited State | Energy (eV), $\lambda$ (nm) | Oscillator Strength (f) | MOs, coefficients (69 = HOMO, 70 = LUMO) |
|---------------|-----------------------------|-------------------------|------------------------------------------|
| 2             | 3.1163 eV 397.86 nm         | 0.9835                  | 69 -> 70 0.70472                         |
| 3             | 4.1017 eV 302.27 nm         | 0.0143                  | 66 -> 70 0.64377                         |
|               |                             |                         | 67 -> 70 -0.28106                        |
| 4             | 4.1808 eV 296.55 nm         | 0.0723                  | 65 -> 70 0.26061                         |
|               |                             |                         | 66 -> 70 0.24949                         |
|               |                             |                         | 67 -> 70 0.54743                         |
| 5             | 4.2373 eV 292.60 nm         | 0.0837                  | 69 -> 71 0.24278                         |
|               |                             |                         | 65 -> 70 0.41859                         |
|               |                             |                         | 66 -> 70 -0.12664                        |
|               |                             |                         | 67 -> 70 -0.32760                        |
|               |                             |                         | 69 -> 71 0.43750                         |
| 6             | 4.7106 eV 263.20 nm         | 0.1658                  | 65 -> 70 0.49787                         |
|               |                             |                         | 69 -> 71 -0.48257                        |
| 11            | 5.2592 eV 235.75 nm         | 0.0236                  | 64 -> 70 -0.25627                        |
|               |                             |                         | 67 -> 71 0.11798                         |
|               |                             |                         | 69 -> 76 0.63046                         |
| 13            | 5.3032 eV 233.79 nm         | 0.0717                  | 69 -> 74 0.63682                         |
|               |                             |                         | 69 -> 75 -0.24321                        |

**Table S18. XYZ coordinates optimized molecular geometry of *cis*-6.**

|   |          |          |          |
|---|----------|----------|----------|
| C | -6.11442 | 0.47     | -0.249   |
| C | -4.94811 | 0.70615  | 0.49119  |
| C | -3.97233 | 1.58405  | 0.00021  |
| C | -5.32916 | 1.98965  | -1.97115 |
| C | -6.30495 | 1.11176  | -1.48017 |
| H | -6.85946 | -0.20029 | 0.12587  |
| H | -5.47463 | 2.47964  | -2.91118 |
| C | -4.16285 | 2.2258   | -1.23096 |
| C | -2.08777 | 0.19041  | -2.01384 |
| C | -2.77002 | -1.27717 | -0.43168 |
| C | -2.13731 | -0.05597 | -0.64492 |
| C | -1.44444 | 1.4709   | -2.57783 |
| H | -2.12366 | 1.94176  | -3.25743 |

|   |          |          |          |
|---|----------|----------|----------|
| H | -1.22136 | 2.14159  | -1.77452 |
| H | -0.54131 | 1.21902  | -3.09341 |
| C | -2.98157 | -1.83612 | 0.98762  |
| H | -2.84096 | -1.05363 | 1.70374  |
| H | -3.97501 | -2.22414 | 1.07373  |
| H | -2.27571 | -2.61897 | 1.17152  |
| N | -1.60791 | 0.82823  | 0.40333  |
| N | -2.69068 | 1.84356  | 0.81361  |
| N | -2.69462 | -0.88368 | -2.67939 |
| N | -3.12723 | -1.8141  | -1.67638 |
| C | -2.8578  | -1.03035 | -4.13292 |
| H | -1.92791 | -0.82106 | -4.61914 |
| H | -3.16089 | -2.0314  | -4.35859 |
| H | -3.60337 | -0.34535 | -4.47905 |
| H | -3.41782 | 2.8961   | -1.60583 |
| C | -7.79048 | -0.66508 | -2.46013 |
| H | -8.03465 | -1.09827 | -1.5127  |
| H | -8.58822 | -0.84411 | -3.15039 |
| H | -6.89023 | -1.1071  | -2.83303 |
| H | -4.80265 | 0.21616  | 1.43121  |
| S | -7.5866  | 0.85225  | -2.29357 |

**Table S19. Details of electronic transitions of *cis*-6.**

| Excited State | Energy (eV), $\lambda$ (nm) | Oscillator Strength (f) | MOs, coefficients<br>(69 = HOMO, 70 = LUMO) |          |
|---------------|-----------------------------|-------------------------|---------------------------------------------|----------|
|               |                             |                         |                                             |          |
| 1             | 2.5281 eV 490.43 nm         | 0.1457                  | 66 -> 70                                    | 0.14436  |
|               |                             |                         | 68 -> 70                                    | 0.23801  |
|               |                             |                         | 69 -> 70                                    | 0.64527  |
| 2             | 3.5046 eV 353.78 nm         | 0.2285                  | 66 -> 70                                    | 0.18694  |
|               |                             |                         | 68 -> 70                                    | 0.61373  |
|               |                             |                         | 69 -> 70                                    | -0.27241 |
| 3             | 3.9936 eV 310.46 nm         | 0.1283                  | 66 -> 70                                    | 0.17404  |
|               |                             |                         | 67 -> 70                                    | 0.64930  |
|               |                             |                         | 69 -> 71                                    | 0.16830  |
| 4             | 4.0330 eV 307.42 nm         | 0.1297                  | 66 -> 70                                    | 0.60956  |
|               |                             |                         | 67 -> 70                                    | -0.22684 |
|               |                             |                         | 68 -> 70                                    | -0.19435 |
|               |                             |                         | 69 -> 72                                    | -0.11250 |
| 6             | 4.5693 eV 271.34 nm         | 0.0948                  | 65 -> 70                                    | 0.58923  |
|               |                             |                         | 68 -> 71                                    | -0.13918 |
|               |                             |                         | 69 -> 71                                    | -0.26027 |
|               |                             |                         | 69 -> 72                                    | 0.19168  |
| 7             | 4.7716 eV 259.84 nm         | 0.0867                  | 65 -> 70                                    | -0.15365 |
|               |                             |                         | 68 -> 71                                    | 0.12648  |
|               |                             |                         | 69 -> 72                                    | 0.61129  |
|               |                             |                         | 69 -> 73                                    | 0.19829  |
| 8             | 4.8364 eV 256.36 nm         | 0.0296                  | 69 -> 72                                    | -0.16291 |
|               |                             |                         | 69 -> 73                                    | 0.64280  |
|               |                             |                         | 69 -> 74                                    | -0.13689 |
|               |                             |                         | 65 -> 70                                    | 0.15477  |
| 10            | 4.9272 eV 251.63 nm         | 0.0246                  | 68 -> 71                                    | 0.66168  |
|               |                             |                         | 64 -> 70                                    | 0.64823  |
| 11            | 5.0382 eV 246.09 nm         | 0.0222                  | 69 -> 75                                    | -0.17749 |
|               |                             |                         | 64 -> 70                                    | 0.17574  |
| 12            | 5.0904 eV 243.57 nm         | 0.0533                  | 69 -> 75                                    | 0.66132  |
|               |                             |                         | 68 -> 72                                    | -0.11479 |
| 14            | 5.3654 eV 231.08 nm         | 0.0147                  | 68 -> 73                                    | -0.11364 |
|               |                             |                         | 69 -> 77                                    | 0.65891  |
|               |                             |                         | 68 -> 72                                    | 0.61961  |
| 16            | 5.4974 eV 225.53 nm         | 0.0236                  | 69 -> 78                                    | -0.22101 |
|               |                             |                         | 69 -> 79                                    | -0.13170 |
|               |                             |                         | 63 -> 70                                    | 0.43653  |
| 17            | 5.5172 eV 224.72 nm         | 0.0219                  | 66 -> 71                                    | 0.15074  |
|               |                             |                         | 68 -> 72                                    | 0.15947  |
|               |                             |                         | 69 -> 78                                    | 0.47425  |
| 18            | 5.5728 eV 222.48 nm         | 0.0739                  | 63 -> 70                                    | -0.11015 |

|    |           |           |          |          |
|----|-----------|-----------|----------|----------|
|    |           |           | 65 -> 71 | -0.12800 |
|    |           |           | 66 -> 71 | 0.38518  |
|    |           |           | 67 -> 71 | 0.55820  |
| 19 | 5.6186 eV | 220.67 nm | 66 -> 71 | 0.52069  |
|    |           | 0.0175    | 67 -> 71 | -0.40781 |
|    |           |           | 69 -> 79 | -0.14725 |

**Table S20. XYZ coordinates optimized molecular geometry of *trans-2a*.**

|   |          |          |          |
|---|----------|----------|----------|
| C | -6.07296 | 0.39044  | -0.33798 |
| C | -3.96675 | 1.55845  | -0.03564 |
| C | -5.31207 | 1.97403  | -2.01281 |
| C | -6.26777 | 1.05683  | -1.55532 |
| H | -6.80266 | -0.30987 | 0.01132  |
| H | -5.46081 | 2.48284  | -2.94227 |
| H | -7.14621 | 0.86533  | -2.13547 |
| N | -2.75993 | 1.82154  | 0.76138  |
| N | -2.58867 | 1.2357   | 1.83157  |
| C | -1.05067 | 0.94389  | 3.79315  |
| C | -0.24726 | 2.44436  | 2.28589  |
| C | -1.38184 | 1.49879  | 2.62859  |
| N | 0.1348   | 1.64401  | 4.33638  |
| N | 0.65244  | 2.37778  | 3.22553  |
| C | -1.77687 | -0.23885 | 4.46049  |
| H | -2.81194 | -0.22037 | 4.18995  |
| H | -1.33861 | -1.15791 | 4.13161  |
| H | -1.68463 | -0.16004 | 5.52359  |
| C | -0.16574 | 3.32808  | 1.02732  |
| H | -0.68672 | 2.85215  | 0.22298  |
| H | -0.61351 | 4.27865  | 1.22936  |
| H | 0.85964  | 3.46746  | 0.75518  |
| C | -4.16156 | 2.22484  | -1.25298 |
| C | -3.83013 | 4.16908  | -2.50325 |
| H | -4.31686 | 3.71376  | -3.34031 |
| H | -4.55479 | 4.67856  | -1.90308 |
| H | -3.10043 | 4.86938  | -2.85255 |
| C | -4.92245 | 0.64125  | 0.42185  |
| C | -5.99225 | -0.33081 | 2.25589  |
| H | -6.52326 | 0.58171  | 2.4298   |
| H | -6.5592  | -0.95307 | 1.59539  |
| H | -5.84351 | -0.83961 | 3.18535  |
| C | 1.11645  | 0.70604  | 4.89982  |
| H | 1.96525  | 1.25039  | 5.25774  |
| H | 0.67084  | 0.16724  | 5.70978  |
| H | 1.4278   | 0.01773  | 4.14206  |
| O | -4.72367 | -0.03874 | 1.66403  |
| O | -3.18636 | 3.16076  | -1.71981 |

**Table S21. Details of electronic transitions of *trans-2a*.**

| Excited State | Energy (eV), $\lambda$ (nm) | Oscillator Strength (f) | MOs, coefficients<br>(73 = HOMO, 74 = LUMO) |          |
|---------------|-----------------------------|-------------------------|---------------------------------------------|----------|
| 1             | 2.7561 eV 449.86 nm         | 0.0722                  | 71 -> 74                                    | -0.29866 |
|               |                             |                         | 73 -> 74                                    | 0.63069  |
| 2             | 3.6343 eV 341.15 nm         | 0.0226                  | 72 -> 74                                    | 0.69981  |
| 3             | 3.7415 eV 331.38 nm         | 0.4438                  | 69 -> 74                                    | -0.22861 |
|               |                             |                         | 71 -> 74                                    | 0.58703  |
|               |                             |                         | 73 -> 74                                    | 0.30988  |
| 4             | 4.3810 eV 283.00 nm         | 0.0184                  | 70 -> 74                                    | 0.69670  |
| 5             | 4.5661 eV 271.53 nm         | 0.2796                  | 69 -> 74                                    | 0.61063  |
|               |                             |                         | 71 -> 74                                    | 0.20936  |
|               |                             |                         | 73 -> 75                                    | -0.10766 |
|               |                             |                         | 73 -> 76                                    | -0.23272 |
| 6             | 4.9051 eV 252.76 nm         | 0.0120                  | 69 -> 74                                    | 0.11424  |
|               |                             |                         | 73 -> 75                                    | 0.65969  |

|    |                     |        |          |          |
|----|---------------------|--------|----------|----------|
| 9  | 5.1685 eV 239.88 nm | 0.0222 | 71 -> 78 | -0.10910 |
|    |                     |        | 73 -> 77 | 0.50412  |
|    |                     |        | 73 -> 78 | 0.45520  |
| 12 | 5.4294 eV 228.36 nm | 0.0166 | 72 -> 75 | 0.46949  |
|    |                     |        | 72 -> 76 | -0.16163 |
|    |                     |        | 72 -> 77 | -0.27068 |
|    |                     |        | 72 -> 78 | 0.13471  |
|    |                     |        | 73 -> 80 | -0.34105 |
|    |                     |        | 73 -> 81 | -0.12548 |
| 14 | 5.5752 eV 222.38 nm | 0.0811 | 68 -> 74 | 0.24631  |
|    |                     |        | 69 -> 79 | 0.13426  |
|    |                     |        | 71 -> 75 | 0.16977  |
|    |                     |        | 71 -> 79 | -0.30593 |
|    |                     |        | 72 -> 76 | 0.35509  |
|    |                     |        | 72 -> 77 | 0.19160  |
|    |                     |        | 73 -> 79 | 0.23709  |
|    |                     |        | 73 -> 80 | -0.10926 |
| 15 | 5.5798 eV 222.20 nm | 0.0333 | 68 -> 74 | 0.61452  |
|    |                     |        | 71 -> 75 | 0.11039  |
|    |                     |        | 71 -> 79 | 0.14587  |
|    |                     |        | 72 -> 76 | -0.17069 |
|    |                     |        | 73 -> 79 | -0.11982 |
| 16 | 5.6157 eV 220.78 nm | 0.0280 | 68 -> 74 | -0.21430 |
|    |                     |        | 71 -> 75 | 0.46030  |
|    |                     |        | 71 -> 76 | 0.23799  |
|    |                     |        | 71 -> 77 | 0.10706  |
|    |                     |        | 72 -> 79 | 0.16059  |
|    |                     |        | 73 -> 76 | 0.18135  |
|    |                     |        | 73 -> 82 | -0.20576 |
| 19 | 5.7359 eV 216.16 nm | 0.0356 | 71 -> 75 | -0.28835 |
|    |                     |        | 71 -> 76 | 0.53993  |
|    |                     |        | 72 -> 78 | -0.12763 |
|    |                     |        | 72 -> 79 | 0.15332  |
|    |                     |        | 72 -> 80 | -0.12946 |
|    |                     |        | 73 -> 82 | 0.12285  |
| 20 | 5.7558 eV 215.41 nm | 0.0191 | 72 -> 78 | 0.30975  |
|    |                     |        | 72 -> 79 | 0.24128  |
|    |                     |        | 72 -> 80 | 0.51905  |
|    |                     |        | 73 -> 83 | 0.10735  |

**Table S22. XYZ coordinates optimized molecular geometry of *cis*-2a.**

|   |          |          |          |
|---|----------|----------|----------|
| C | -6.10509 | 0.45961  | -0.26345 |
| C | -4.93878 | 0.69576  | 0.47674  |
| C | -3.963   | 1.57366  | -0.01424 |
| C | -5.31983 | 1.97926  | -1.9856  |
| C | -6.29561 | 1.10136  | -1.49462 |
| H | -6.85013 | -0.21068 | 0.11142  |
| H | -5.46529 | 2.46925  | -2.92563 |
| H | -7.18612 | 0.92106  | -2.05977 |
| C | -4.15352 | 2.21541  | -1.24541 |
| C | -3.74689 | 4.53375  | -2.83779 |
| H | -4.25649 | 4.07228  | -3.65769 |
| H | -4.44943 | 5.07837  | -2.2422  |
| H | -3.00186 | 5.20405  | -3.21266 |
| C | -5.48389 | -1.62607 | 2.02197  |
| H | -6.53048 | -1.47969 | 1.85424  |
| H | -5.07818 | -2.23078 | 1.23799  |
| H | -5.33842 | -2.11606 | 2.96199  |
| C | -2.07844 | 0.18002  | -2.02829 |
| C | -2.76069 | -1.28756 | -0.44613 |
| C | -2.12798 | -0.06636 | -0.65937 |
| C | -1.43511 | 1.4605   | -2.59228 |
| H | -2.11433 | 1.93137  | -3.27188 |
| H | -1.21203 | 2.1312   | -1.78897 |
| H | -0.53198 | 1.20863  | -3.10786 |

|   |          |          |          |
|---|----------|----------|----------|
| C | -2.97224 | -1.84652 | 0.97317  |
| H | -2.83163 | -1.06402 | 1.68929  |
| H | -3.96568 | -2.23453 | 1.05928  |
| H | -2.26638 | -2.62937 | 1.15707  |
| N | -1.59858 | 0.81784  | 0.38888  |
| N | -2.68134 | 1.83316  | 0.79916  |
| N | -2.68528 | -0.89408 | -2.69384 |
| N | -3.1179  | -1.8245  | -1.69083 |
| C | -2.84847 | -1.04075 | -4.14737 |
| H | -1.91858 | -0.83145 | -4.63359 |
| H | -3.15156 | -2.0418  | -4.37304 |
| H | -3.59404 | -0.35575 | -4.4935  |
| O | -2.96982 | 3.28036  | -1.841   |
| O | -4.69679 | -0.11937 | 2.04052  |

**Table S23. Details of electronic transitions of *cis*-2a.**

| Excited State | Energy (eV), $\lambda$ (nm) | Oscillator Strength (f) | MOs, coefficients<br>(73 = HOMO, 74 = LUMO) |          |
|---------------|-----------------------------|-------------------------|---------------------------------------------|----------|
|               |                             |                         |                                             |          |
|               | 2.6873 eV 461.37 nm         | 0.0743                  | 69 -> 74                                    | 0.17839  |
|               |                             |                         | 73 -> 74                                    | 0.68072  |
| 1             | 3.5716 eV 347.14 nm         | 0.0260                  | 72 -> 74                                    | 0.70170  |
| 3             | 3.8516 eV 321.91 nm         | 0.0239                  | 69 -> 74                                    | -0.33606 |
| 4             | 4.1019 eV 302.26 nm         | 0.2198                  | 71 -> 74                                    | 0.60076  |
|               |                             |                         | 69 -> 74                                    | 0.56088  |
|               |                             |                         | 70 -> 74                                    | 0.20222  |
|               |                             |                         | 71 -> 74                                    | 0.30908  |
| 5             | 4.1644 eV 297.72 nm         | 0.0204                  | 73 -> 74                                    | -0.16075 |
|               |                             |                         | 69 -> 74                                    | -0.17401 |
|               |                             |                         | 70 -> 74                                    | 0.67002  |
| 6             | 4.8036 eV 258.11 nm         | 0.0996                  | 71 -> 74                                    | -0.11866 |
|               |                             |                         | 73 -> 75                                    | 0.64572  |
|               |                             |                         | 73 -> 76                                    | -0.12903 |
| 8             | 4.9886 eV 248.53 nm         | 0.0245                  | 73 -> 76                                    | 0.67180  |
| 9             | 5.2127 eV 237.85 nm         | 0.0337                  | 73 -> 77                                    | -0.10843 |
|               |                             |                         | 72 -> 75                                    | 0.11211  |
|               |                             |                         | 73 -> 77                                    | -0.23243 |
|               |                             |                         | 73 -> 78                                    | -0.33521 |
|               |                             |                         | 73 -> 79                                    | 0.47482  |
| 11            | 5.3697 eV 230.90 nm         | 0.0715                  | 73 -> 80                                    | -0.22777 |
|               |                             |                         | 73 -> 81                                    | -0.12775 |
|               |                             |                         | 68 -> 74                                    | 0.12836  |
|               |                             |                         | 71 -> 77                                    | 0.11372  |
|               |                             |                         | 72 -> 75                                    | 0.35597  |
|               |                             |                         | 73 -> 77                                    | -0.24830 |
|               |                             |                         | 73 -> 79                                    | -0.33826 |
|               |                             |                         | 73 -> 80                                    | -0.18221 |
| 12            | 5.4256 eV 228.52 nm         | 0.0413                  | 73 -> 81                                    | -0.29531 |
|               |                             |                         | 68 -> 74                                    | 0.61128  |
|               |                             |                         | 73 -> 79                                    | 0.11741  |
|               |                             |                         | 73 -> 80                                    | 0.22211  |
| 13            | 5.4502 eV 227.48 nm         | 0.0160                  | 73 -> 81                                    | -0.14539 |
|               |                             |                         | 72 -> 75                                    | 0.22291  |
|               |                             |                         | 72 -> 76                                    | -0.42530 |
|               |                             |                         | 72 -> 79                                    | 0.12056  |
|               |                             |                         | 73 -> 78                                    | -0.10180 |
|               |                             |                         | 73 -> 79                                    | 0.10785  |
| 14            | 5.4601 eV 227.07 nm         | 0.0602                  | 73 -> 80                                    | 0.43229  |
|               |                             |                         | 68 -> 74                                    | -0.13014 |
|               |                             |                         | 71 -> 77                                    | 0.12816  |
|               |                             |                         | 72 -> 75                                    | 0.16915  |
|               |                             |                         | 72 -> 76                                    | 0.48770  |
| 15            | 5.4920 eV 225.76 nm         | 0.0212                  | 72 -> 79                                    | -0.10028 |
|               |                             |                         | 73 -> 77                                    | -0.18929 |
|               |                             |                         | 73 -> 80                                    | 0.35167  |
|               |                             |                         | 68 -> 74                                    | 0.24519  |
|               |                             |                         | 72 -> 75                                    | 0.18262  |
|               |                             |                         | 73 -> 80                                    | -0.14523 |



|    |           |           |        |          |          |
|----|-----------|-----------|--------|----------|----------|
| 18 | 5.7697 eV | 214.89 nm | 0.0248 | 73 -> 81 | 0.57353  |
| 19 | 5.7936 eV | 214.00 nm | 0.0282 | 72 -> 78 | 0.66179  |
|    |           |           |        | 67 -> 74 | -0.21562 |
|    |           |           |        | 69 -> 75 | -0.13536 |
|    |           |           |        | 72 -> 76 | 0.11059  |
|    |           |           |        | 72 -> 77 | -0.42568 |
|    |           |           |        | 72 -> 79 | 0.43585  |
|    |           |           |        | 72 -> 82 | 0.10126  |
| 20 | 5.8074 eV | 213.49 nm | 0.0438 | 67 -> 74 | 0.26498  |
|    |           |           |        | 69 -> 75 | 0.19135  |
|    |           |           |        | 72 -> 76 | 0.10485  |
|    |           |           |        | 72 -> 77 | 0.29088  |
|    |           |           |        | 72 -> 79 | 0.44338  |
|    |           |           |        | 72 -> 81 | 0.17289  |
|    |           |           |        | 72 -> 82 | 0.11646  |

## References:

- [1] S. Kudo, N. Hoshino, T. Beppu and H. Katagiri, *Chem. Phys. Chem.*, 2019, **20**, 1581–1589.
- [2] C. Bosset, G. Lefebvre, P. Angibaud, I. Stansfield, L. Meerpoel, D. Berthelot, A. Guérinot and J. Cossy, *J. Org. Chem.*, 2017, **82**, 4020-4036.
- [3] M. K. Paira, T. K. Mondal, D. Ojha, A. M. Z. Slawin, E. R. T. Tiekink, A. Samanta and C. Sinha, *Inorg. Chim. Acta.*, 2011, **370**, 175-186.
- [4] L. Stricker, M. Boeckmann, T. M. Kirse, N. L. Doltsinis and B. J. Ravoo, *Chem. Eur. J.*, 2018, **24**, 8639- 8647.
- [5] J. Tomasi, B. Mennucci and R. Cammi, *Chem. Rev.*, 2005, **105**, 2999-3093.
- [6] M. J. Frisch, G. W. Trucks, H. B. Schlegel, G. E. Scuseria, M. A. Robb, J. R. Cheeseman, G. Scalmani, V. Barone, B. Mennucci, G. A. Petersson, H. Nakatsuji, M. Caricato, X. Li, H. P. Hratchian, A. F. Izmaylov, J. Bloino, G. Zheng, J. L. Sonnenberg, M. Hada, M. Ehara, K. Toyota, R. Fukuda, J. Hasegawa, M. Ishida, T. Nakajima, Y. Honda, O. Kitao, H. Nakai, T. Vreven, J. A. Montgomery, Jr. J. E. Peralta, F. Ogliaro, M. Bearpark, J. J. Heyd, E. Brothers, K. N. Kudin, V. N. Staroverov, R. Kobayashi, J. Normand, K. Raghavachari, A. Rendell, J. C. Burant, S. S. Iyengar, J. Tomasi, M. Cossi, N. Rega, J. M. Millam, M. Klene, J. E. Knox, J. B. Cross, V. Bakken, C. Adamo, J. Jaramillo, R. Gomperts, R. E. Stratmann, O. Yazyev, A. J. Austin, R. Cammi, C. Pomelli, J. W. Ochterski, R. L. Martin, K. Morokuma, V. G. Zakrzewski, G. A. Voth, P. Salvador, J. J. Dannenberg, S. Dapprich, A. D. Daniels, Ö. Farkas, J. B. Foresman, J. V. Ortiz, J. Cioslowski, and D. J. Fox, *Gaussian, Inc. Wallingford CT*, 2009.
- [7] R. E. Stratmann, G. E. Scuseria and M. J. Frisch, *J. Chem. Phys.*, 1998, **109**, 8218-8224.
